# Supplementary material for: Multi-Omic Investigation of Low-Nitrogen Conditional Resistance to Clubroot Reveals Brassica napus Genes Involved in Nitrate Assimilation
Source: Front Plant Sci. 2022 Feb 11;13:790563. doi: 10.3389/fpls.2022.790563 (PMC8874135; doi:10.3389/fpls.2022.790563)
Supplement: Supplementary Table S1 — Number of paired-end reads sequenced for each sample. [file Table_1.XLSX]

## Sheet: eH vs Ni
Supplementary Table S3a: List of differentially expressed genes according to inoculation.
						Log2FC for the comparison between eH and Ni (positive value are up regulated in eH)
GO_Term	GO_acc	BnaGenesID	Chr	AthGeneID	Description	HD018_1mM_T14	Yudal_1mM_T14	HD018_8mM_T14	Yudal_8mM_T14	HD018_1mM_T27	Yudal_1mM_T27	HD018_8mM_T27	Yudal_8mM_T27
defense response to bacterium	GO:0042742	BnaA01g18260D	chrA01	AT4G12720	NUDT7	3.85785	3.34081	3.71473	2.62067	4.66342	4.79802	4.91135	4.46668
defense response to bacterium	GO:0042742	BnaA06g16150D	chrA06	AT3G49120	ATPERX34_PERX34_PRXCB_ATPCB_PRX34	3.77421	3.59982	2.81379	2.40667	4.76961	3.83069	4.1034	3.6933
defense response to bacterium	GO:0042742	BnaA01g20660D	chrA01	AT3G49120	ATPERX34_PERX34_PRXCB_ATPCB_PRX34	3.02537	1.70665	2.60897	2.19031	3.85164	2.27213	4.01335	3.4416
defense response to bacterium	GO:0042742	BnaC08g20820D	chrC08	AT3G49120	ATPERX34_PERX34_PRXCB_ATPCB_PRX34	2.69537	2.6389	1.74824	1.51409	4.40067	2.77878	3.34188	2.87888
defense response to bacterium	GO:0042742	BnaC04g03790D	chrC04	AT2G44490	PEN2_BGLU26	0	0	2.3961	0	4.82744	4.28201	5.00471	3.67664
defense response to bacterium	GO:0042742	BnaA01g12660D	chrA01	AT4G23190	CRK11_AT_RLK3	1.98353	1.7468	2.50022	1.98567	2.47844	1.18305	2.48701	2.51666
defense response to bacterium	GO:0042742	BnaC04g45370D	chrC04	AT2G37660	NAD	2.10943	0	0	2.66932	1.93487	0	4.29493	5.05093
defense response to bacterium	GO:0042742	BnaC08g47780D	chrC08_random	AT4G12720	NUDT7	1.62354	1.57627	1.79728	1.47169	1.58728	2.46633	2.138	2.7743
defense response to bacterium	GO:0042742	BnaA02g21660D	chrA02	AT4G11650	ATOSM34_OSM34	1.38572	1.01217	1.59953	1.11491	1.96776	1.73462	3.21308	2.88826
defense response to bacterium	GO:0042742	BnaC08g47770D	chrC08_random	AT4G12720	NUDT7	1.63111	1.48642	1.6255	1.64929	1.9635	1.7974	2.02116	2.55551
defense response to bacterium	GO:0042742	BnaC01g14620D	chrC01	AT4G23210	CRK13	2.2796	1.7674	1.91534	1.78545	2.00519	1.61565	1.54224	1.43003
defense response to bacterium	GO:0042742	BnaA01g12920D	chrA01	AT4G23210	CRK13	1.83492	1.75504	1.92416	1.82289	2.23534	1.09624	1.87246	1.73801
defense response to bacterium	GO:0042742	BnaC01g25860D	chrC01	AT3G49120	ATPERX34_PERX34_PRXCB_ATPCB_PRX34	1.25555	0.949152	0.925071	0	3.01281	1.48483	3.37975	2.54502
defense response to bacterium	GO:0042742	BnaA07g28800D	chrA07	AT1G70690	HWI1_PDLP5	1.6856	1.4123	2.02193	1.41568	1.88307	1.84851	1.71664	1.47119
defense response to bacterium	GO:0042742	BnaC06g31800D	chrC06	AT1G70690	HWI1_PDLP5	1.27805	1.54281	1.6779	1.48561	1.41047	1.92814	1.4698	1.5024
defense response to bacterium	GO:0042742	BnaC03g60820D	chrC03	AT4G39950	CYP79B2	1.23178	1.35547	0	1.19966	1.7786	2.72572	1.31565	2.14601
defense response to bacterium	GO:0042742	BnaA04g29010D	chrA04_random	AT2G37660	NAD	2.16027	3.62795	0	0	0	0	4.02685	0
defense response to bacterium	GO:0042742	BnaC07g40090D	chrC07	AT4G26070	MEK1_NMAPKK_ATMEK1_MKK1	1.1744	1.30067	1.21585	1.05617	1.28555	1.16207	1.28071	1.16719
defense response to bacterium	GO:0042742	BnaA03g20420D	chrA03	AT2G43710	SSI2_FAB2	0	0	0	0	3.14972	0	4.05235	2.41843
defense response to bacterium	GO:0042742	BnaC03g24420D	chrC03	AT2G43710	SSI2_FAB2	0	0	0	0	2.62433	1.35515	3.33647	2.04246
defense response to bacterium	GO:0042742	BnaA02g23720D	chrA02	AT5G45110	NPR3_ATNPR3	1.43219	1.00493	0.903986	1.14293	1.41038	1.98864	1.35413	0
defense response to bacterium	GO:0042742	BnaC01g00800D	chrC01	AT4G39950	CYP79B2	1.0947	1.07749	0.813207	0	2.28408	1.73638	1.08156	0.751179
defense response to bacterium	GO:0042742	BnaC09g32980D	chrC09	AT5G57220	CYP81F2	0	0	0	0	2.02884	1.33067	3.14309	1.49053
defense response to bacterium	GO:0042742	BnaC03g22580D	chrC03	AT4G12720	NUDT7	1.04675	0.734193	1.37504	0.930014	0.814725	0.692611	1.23334	1.02232
defense response to bacterium	GO:0042742	BnaA10g11290D	chrA10	AT5G57220	CYP81F2	1.23405	0	0	0	1.6277	1.2338	2.12226	1.23917
defense response to bacterium	GO:0042742	BnaA03g47820D	chrA03	AT4G26070	MEK1_NMAPKK_ATMEK1_MKK1	0.869846	0.903251	0.803275	0.830514	1.01538	0.947087	1.09768	0.952593
defense response to bacterium	GO:0042742	BnaC01g18040D	chrC01	AT4G26090	RPS2	1.25906	0	1.31502	0.895273	1.21116	0	1.85155	0.852056
defense response to bacterium	GO:0042742	BnaA01g15270D	chrA01	AT4G26090	RPS2	1.13275	0	1.54087	0.894722	0.746724	0	1.54532	1.16849
defense response to bacterium	GO:0042742	BnaA09g16870D	chrA09	AT5G44070	CAD1_ARA8_ATPCS1_PCS1	0	1.07367	0	0	1.39516	1.62643	0.953679	1.69343
defense response to bacterium	GO:0042742	BnaC09g32990D	chrC09	AT5G57220	CYP81F2	0	0	0	0	1.94056	0	2.98422	1.43882
defense response to bacterium	GO:0042742	BnaC02g47510D	chrC02_random	AT5G45260	NA	0.900476	0	0.874737	0	1.08061	1.13166	1.45234	0.881307
defense response to bacterium	GO:0042742	BnaA10g11280D	chrA10	AT5G57220	CYP81F2	0	0	0	0	1.63723	1.22707	2.13487	1.16034
defense response to bacterium	GO:0042742	BnaA09g00250D	chrA09	AT4G01050	TROL	1.26128	0	0	0	1.54667	0	3.05432	0
defense response to bacterium	GO:0042742	BnaCnng01840D	chrCnn_random	AT4G01050	TROL	0	0	0	0	1.16338	0	2.69049	1.99925
defense response to bacterium	GO:0042742	BnaC07g18270D	chrC07	AT5G45260	NA	1.03147	1.11036	0.852271	1.04549	0.596613	0	0	0.87421
defense response to bacterium	GO:0042742	BnaC04g03030D	chrC04	AT2G43710	SSI2_FAB2	0	0	0	0	1.92715	1.02514	2.12375	0
defense response to bacterium	GO:0042742	BnaC07g02890D	chrC07	AT5G45110	NPR3_ATNPR3	1.00327	0	1.16484	0	0.598109	0.65899	0.618484	0.832194
defense response to bacterium	GO:0042742	BnaC01g15640D	chrC01	AT4G23810	WRKY53_ATWRKY53	0.571951	0.577319	0.793073	0.553325	0	0.619086	0.73708	0.864761
defense response to bacterium	GO:0042742	BnaA08g16100D	chrA08	AT4G39950	CYP79B2	1.42937	0	0	0	1.64591	1.37822	0	0
defense response to bacterium	GO:0042742	BnaAnng05410D	chrAnn_random	AT5G45110	NPR3_ATNPR3	1.18288	0	0.929967	0	0.946029	1.35385	0	0
defense response to bacterium	GO:0042742	BnaAnng28220D	chrAnn_random	AT5G26920	CBP60G	0.964531	0	0.972714	0.884464	0	0	0.659178	0.892057
defense response to bacterium	GO:0042742	BnaC01g24000D	chrC01	AT3G44880	ACD1_LLS1_PAO	0	0	0	0	1.6812	1.54758	1.13303	0
defense response to bacterium	GO:0042742	BnaC02g40040D	chrC02	AT5G26920	CBP60G	0	0	0	0	0.884179	0.826503	1.17943	1.45364
defense response to bacterium	GO:0042742	BnaA01g34610D	chrA01_random	AT4G39950	CYP79B2	0.877664	0	0	0	1.28026	1.43762	0.747321	0
defense response to bacterium	GO:0042742	BnaA02g23810D	chrA02	AT5G45250	RPS4	0	0	0.663087	0	0.999994	0.927944	0.927823	0.72415
defense response to bacterium	GO:0042742	BnaA03g24880D	chrA03	AT4G11850	PLDGAMMA1_MEE54	1.01688	0	0	0	0	0	1.2879	1.73349
defense response to bacterium	GO:0042742	BnaA05g03490D	chrA05	AT2G43710	SSI2_FAB2	0	0	0	0	1.35665	0.777109	1.50883	0
defense response to bacterium	GO:0042742	BnaA01g13440D	chrA01	AT4G23810	WRKY53_ATWRKY53	0	0.634664	0.819551	0.521829	0	0	0.720114	0.875105
defense response to bacterium	GO:0042742	BnaA02g23780D	chrA02	AT5G45260	NA	0.53373	0	0	0	1.07334	0	1.16796	0.78937
defense response to bacterium	GO:0042742	BnaC09g17830D	chrC09	AT5G44070	CAD1_ARA8_ATPCS1_PCS1	0	0	0	0	1.71924	1.7826	0	0
defense response to bacterium	GO:0042742	BnaAnng03490D	chrAnn_random	AT3G44880	ACD1_LLS1_PAO	0	0	0	0	1.5951	0	1.65461	0
defense response to bacterium	GO:0042742	BnaC03g73050D	chrC03_random	AT4G11850	PLDGAMMA1_MEE54	0.916685	0	0.916451	0	0	0	0	1.22934
defense response to bacterium	GO:0042742	BnaC02g30770D	chrC02	AT5G44070	CAD1_ARA8_ATPCS1_PCS1	0.861856	0	0	0	0.841501	1.35335	0	0
defense response to bacterium	GO:0042742	BnaC02g11750D	chrC02	AT5G57220	CYP81F2	1.1527	0	0	0	0	1.49731	0	0
defense response to bacterium	GO:0042742	BnaA09g17530D	chrA09	AT5G45250	RPS4	0.94065	0	0	0	0.724917	0.877116	0	0
defense response to bacterium	GO:0042742	BnaA02g31430D	chrA02	AT5G26920	CBP60G	0	0	0	0	1.16752	0	0.960295	0
defense response to bacterium	GO:0042742	BnaA03g46280D	chrA03	AT4G23810	WRKY53_ATWRKY53	0	0	0	0.791006	0	0	0	0.748328
defense response to bacterium	GO:0042742	BnaC07g38550D	chrC07	AT4G23810	WRKY53_ATWRKY53	0	0	0.68672	0.746231	0	0	0	0
defense response to bacterium	GO:0042742	BnaA02g22480D	chrA02	AT5G44070	CAD1_ARA8_ATPCS1_PCS1	0	0	0	0	0	1.17441	0	0
defense response to bacterium	GO:0042742	BnaA09g16890D	chrA09	AT5G44070	CAD1_ARA8_ATPCS1_PCS1	0	0	0	0	0	1.10296	0	0
defense response to bacterium	GO:0042742	BnaC09g17850D	chrC09	AT5G44070	CAD1_ARA8_ATPCS1_PCS1	0	0	0	0	0	0	0	0.942544
defense response to bacterium	GO:0042742	BnaA09g21320D	chrA09	AT4G11850	PLDGAMMA1_MEE54	0	0	0	0	0	0.520905	0	0
defense response to fungus	GO:0050832	BnaC09g12650D	chrC09	AT1G64070	RLM1	6.68647	6.84452	5.95462	8.11265	8.26924	6.01825	7.30165	8.37827
defense response to fungus	GO:0050832	BnaA09g11740D	chrA09	AT1G64070	RLM1	3.33476	4.32659	4.27896	4.1216	3.85796	3.40962	6.70858	4.51828
defense response to fungus	GO:0050832	BnaCnng51060D	chrCnn_random	AT5G64120	Peroxidase_superfamily_protein	2.81952	0	2.49411	1.88859	5.71312	3.78991	4.59031	3.96052
defense response to fungus	GO:0050832	BnaA08g25340D	chrA08	AT1G11310	MLO2_ATMLO2_PMR2	2.28577	5.53874	1.95405	2.92198	3.05662	3.67869	1.91567	3.03118
defense response to fungus	GO:0050832	BnaA10g28130D	chrA10_random	AT5G64120	Peroxidase_superfamily_protein	2.32917	0	2.03761	1.55975	5.21542	3.41868	3.82388	3.56007
defense response to fungus	GO:0050832	BnaA06g23270D	chrA06	AT5G64120	Peroxidase_superfamily_protein	2.26839	1.09756	2.04867	1.53464	4.43696	2.38495	3.58577	3.03086
defense response to fungus	GO:0050832	BnaA08g04320D	chrA08	AT1G45145	ATTRX5_ATH5_LIV1_TRX5	3.71019	1.95242	3.59094	1.95562	2.19906	1.59535	2.57646	1.47022
defense response to fungus	GO:0050832	BnaC05g40680D	chrC05	AT3G12500	ATHCHIB_PR3_PR_3_CHI_B_B_CHI_HCHIB	2.11973	1.67721	1.91516	1.39575	2.38935	2.17065	2.78155	2.62629
defense response to fungus	GO:0050832	BnaA05g26640D	chrA05	AT3G12500	ATHCHIB_PR3_PR_3_CHI_B_B_CHI_HCHIB	1.91835	1.60637	1.80347	1.42916	2.27929	1.77319	3.04295	2.5599
defense response to fungus	GO:0050832	BnaA02g34070D	chrA02	AT5G64120	Peroxidase_superfamily_protein	0	0	0	0	4.13717	4.99757	2.18723	4.05412
defense response to fungus	GO:0050832	BnaC02g42930D	chrC02	AT5G64120	Peroxidase_superfamily_protein	0	0	0	0	4.49553	4.52264	2.8638	3.27728
defense response to fungus	GO:0050832	BnaA04g01330D	chrA04	AT3G60190	ADL4_ADLP2_EDR3_DRP1E_ADL1E_DL1E	1.51771	1.39441	1.78669	1.41908	1.29776	1.47824	1.78635	1.81187
defense response to fungus	GO:0050832	BnaA04g29190D	chrA04_random	AT2G37130	Peroxidase_superfamily_protein	0.96627	1.153	2.05414	1.96833	1.13958	1.41488	2.02402	1.67835
defense response to fungus	GO:0050832	BnaCnng25840D	chrCnn_random	AT1G45145	ATTRX5_ATH5_LIV1_TRX5	1.71043	1.07266	1.37691	0.991102	1.57125	1.4832	1.66746	1.35525
defense response to fungus	GO:0050832	BnaCnng42110D	chrCnn_random	AT4G11260	ATSGT1B_ETA3_RPR1_EDM1_SGT1B	0	0	0	0	3.09023	0	2.62189	4.62231
defense response to fungus	GO:0050832	BnaC04g22340D	chrC04	AT3G60190	ADL4_ADLP2_EDR3_DRP1E_ADL1E_DL1E	0.955974	0.622451	1.06121	0.588216	0.84283	1.09889	0.790113	0.65901
defense response to fungus	GO:0050832	BnaC09g11670D	chrC09	AT1G63880	Disease_resistance_protein_	0	0	0	0	3.37773	3.01224	0	0
defense response to fungus	GO:0050832	BnaC03g20530D	chrC03	AT2G37130	Peroxidase_superfamily_protein	0	0	0	0	0.926244	0	1.53368	1.10414
defense response to fungus	GO:0050832	BnaA03g32280D	chrA03	AT3G12500	ATHCHIB_PR3_PR_3_CHI_B_B_CHI_HCHIB	1.58257	0	0	0	0	1.72062	0	0
defense response to fungus	GO:0050832	BnaA03g17000D	chrA03	AT2G37130	Peroxidase_superfamily_protein	0	0	0	0	0	0	1.26808	0.957315
defense response to fungus	GO:0050832	BnaC03g37610D	chrC03	AT3G12500	ATHCHIB_PR3_PR_3_CHI_B_B_CHI_HCHIB	1.8777	0	0	0	0	0	0	0
defense response to fungus	GO:0050832	BnaC08g49800D	chrC08_random	AT1G11310	MLO2_ATMLO2_PMR2	0.595173	0	0	0	0	0	0	0
defense response to fungus	GO:0050832	BnaA09g21880D	chrA09	AT4G11260	ATSGT1B_ETA3_RPR1_EDM1_SGT1B	0	0	0	0	0	0	0.56627	0
glucosinolate metabolic process	GO:0019760	BnaC09g00440D	chrC09	AT4G03070	AOP1_AOP_AOP1_1	0	0	0	0	-0.763283	0	-0.557227	0
glucosinolate metabolic process	GO:0019760	BnaA02g20840D	chrA02	AT5G23010	MAM1_IMS3	0	0	0	0	-0.708447	0	0	-0.842158
glucosinolate metabolic process	GO:0019760	BnaC07g11830D	chrC07	AT3G16400	ATMLP_470_NSP1_ATNSP1	0	0	0	0	-2.12183	0	0	0
glucosinolate metabolic process	GO:0019760	BnaC01g35360D	chrC01	AT3G16410	NSP4	0	0	0	0	-1.3598	0	-1.11246	-1.02211
glucosinolate metabolic process	GO:0019760	BnaC06g34930D	chrC06	AT1G74090	SOT18_ATSOT18_ATST5B	0	0	0	0	-1.50205	0	-1.12824	-1.10162
glucosinolate metabolic process	GO:0019760	BnaC03g30370D	chrC03	AT4G03070	AOP1_AOP_AOP1_1	0	0	0	0	-1.95516	-0.929741	-1.12366	0
glucosinolate metabolic process	GO:0019760	BnaC06g34970D	chrC06	AT1G74090	SOT18_ATSOT18_ATST5B	0	0	0	0	-1.09834	-0.946255	-0.93553	-1.0468
glucosinolate metabolic process	GO:0019760	BnaA09g01270D	chrA09	AT4G03070	AOP1_AOP_AOP1_1	0	0	0	0	-2.62444	0	-1.67933	0
glucosinolate metabolic process	GO:0019760	BnaA01g28080D	chrA01	AT3G16410	NSP4	0	0	0	0	-2.25361	0	-1.66137	-1.191
glucosinolate metabolic process	GO:0019760	BnaC05g36930D	chrC05	AT3G16410	NSP4	0	0	0	0	-3.12642	0	-2.39638	0
glucosinolate metabolic process	GO:0019760	BnaA09g43670D	chrA09	AT2G20610	SUR1_HLS3_RTY_ALF1_RTY1	0	0	0	0	-2.17204	0	-2.10583	-1.5654
glucosinolate metabolic process	GO:0019760	BnaC07g11880D	chrC07	AT3G16400	ATMLP_470_NSP1_ATNSP1	0	0	0	0	-2.15924	-0.766487	-1.9043	-1.201
glucosinolate metabolic process	GO:0019760	BnaC08g36300D	chrC08	AT2G20610	SUR1_HLS3_RTY_ALF1_RTY1	0	0	0	0	-2.77665	0	-2.13548	-1.77479
glucosinolate metabolic process	GO:0019760	BnaC09g00430D	chrC09	AT4G03070	AOP1_AOP_AOP1_1	0	0	0	0	-2.67481	-1.64599	-2.24386	-1.52607
glucosinolate metabolic process	GO:0019760	BnaAnng40010D	chrAnn_random	AT3G16400	ATMLP_470_NSP1_ATNSP1	-0.87582	0	0	0	-2.96443	-1.48073	-2.02401	-1.1088
glucosinolate metabolic process	GO:0019760	BnaA05g15660D	chrA05	AT1G47600	BGLU34_TGG4	-1.01818	0	0	0	-3.30074	-1.42137	-2.09668	-1.41934
glucosinolate metabolic process	GO:0019760	BnaA07g31230D	chrA07	AT1G74090	SOT18_ATSOT18_ATST5B	0	0	-1.22995	0	-3.332	-2.26897	-1.98667	-1.31752
glucosinolate metabolic process	GO:0019760	BnaC05g12520D	chrC05	AT1G16410	CYP79F1_BUS1_SPS1	0	0	0	0	-4.70924	-2.20944	-2.0841	-1.43124
glucosinolate metabolic process	GO:0019760	BnaA06g11000D	chrA06	AT1G16410	CYP79F1_BUS1_SPS1	0	0	0	0	-4.82975	-2.18409	-2.13148	-1.37766
glucosinolate metabolic process	GO:0019760	BnaC03g73000D	chrC03_random	AT4G12030	BAT5_BASS5	0	0	-1.57716	0	-3.482	-2.01667	-2.39973	-1.49664
glucosinolate metabolic process	GO:0019760	BnaC09g23550D	chrC09	AT4G12030	BAT5_BASS5	-1.21021	0	-1.44173	0	-4.19652	-2.06441	-1.78169	-1.43464
glucosinolate metabolic process	GO:0019760	BnaA06g11010D	chrA06	AT1G16410	CYP79F1_BUS1_SPS1	0	0	-1.43533	0	-4.736	-2.232	-2.29873	-1.56545
glucosinolate metabolic process	GO:0019760	BnaA09g21160D	chrA09	AT4G12030	BAT5_BASS5	-1.48817	0	-1.72248	0	-3.73355	-2.15366	-2.09408	-1.39529
glucosinolate metabolic process	GO:0019760	BnaA09g21170D	chrA09	AT4G12030	BAT5_BASS5	-1.40387	0	-1.54861	0	-4.50356	-2.12102	-2.06112	-1.2175
glucosinolate metabolic process	GO:0019760	BnaA03g39680D	chrA03	AT5G23020	MAM_L_MAM3_IMS2	-1.40464	0	-1.7339	0	-4.28615	-1.73041	-2.424	-1.65627
glucosinolate metabolic process	GO:0019760	BnaC03g41100D	chrC03	AT3G19710	BCAT4	-1.38265	0	-2.1372	-1.53091	-3.75818	-0.997767	-2.21202	-1.55759
glucosinolate metabolic process	GO:0019760	BnaA03g35400D	chrA03	AT3G19710	BCAT4	-1.57141	0	-2.28904	-1.58513	-4.18348	0	-2.45822	-1.57157
glucosinolate metabolic process	GO:0019760	BnaAnng23360D	chrAnn_random	AT5G23010	MAM1_IMS3	-1.50258	0	-1.52113	0	-4.56115	-1.92022	-2.39058	-1.83531
glucosinolate metabolic process	GO:0019760	BnaC01g24090D	chrC01	AT5G23010	MAM1_IMS3	-3.16282	0	-2.01964	0	-4.61115	0	-2.15001	-2.1779
glucosinolate metabolic process	GO:0019760	BnaC09g23540D	chrC09	AT4G12030	BAT5_BASS5	-1.22717	0	-2.21312	0	-4.72245	-2.31789	-2.0081	-1.65846
glucosinolate metabolic process	GO:0019760	BnaA06g01390D	chrA06	AT1G54040	ESP_TASTY	-3.93026	-1.6194	-2.48275	-1.59306	-1.04883	-2.88787	-0.985486	0
glucosinolate metabolic process	GO:0019760	BnaA04g06630D	chrA04	AT4G13770	CYP83A1_REF2	-1.71463	0	-1.39678	0	-5.18552	-2.84832	-2.32996	-1.58846
glucosinolate metabolic process	GO:0019760	BnaAnng06570D	chrAnn_random	AT5G23020	MAM_L_MAM3_IMS2	-1.5416	0	-2.07446	0	-5.03032	-2.30168	-2.359	-1.82123
glucosinolate metabolic process	GO:0019760	BnaC04g29320D	chrC04	AT4G13770	CYP83A1_REF2	-1.72387	0	-1.5127	0	-5.07651	-2.89465	-2.55134	-1.93061
glucosinolate metabolic process	GO:0019760	BnaC06g06830D	chrC06	AT1G54040	ESP_TASTY	-2.97516	-2.37971	-1.31389	0	-1.97546	-2.8878	-3.16745	-1.35766
glucosinolate metabolic process	GO:0019760	BnaA03g24950D	chrA03	AT4G12030	BAT5_BASS5	-1.52593	0	-1.97916	-1.44564	-4.92326	-2.33173	-2.38112	-1.75945
glucosinolate metabolic process	GO:0019760	BnaC05g33030D	chrC05	AT3G19710	BCAT4	-1.77625	-1.16102	-2.43269	-1.70455	-4.86621	-1.73331	-2.46516	-1.6346
glucosinolate metabolic process	GO:0019760	BnaA03g39720D	chrA03	AT5G23020	MAM_L_MAM3_IMS2	-2.46238	0	-2.63221	-1.64659	-4.65854	-2.39849	-2.30867	-2.04878
glucosinolate metabolic process	GO:0019760	BnaA02g33040D	chrA02	AT5G23020	MAM_L_MAM3_IMS2	-1.91906	-1.27938	-2.52946	-2.13997	-3.54953	-2.03394	-2.72592	-2.10925
glucosinolate metabolic process	GO:0019760	BnaCnng21190D	chrCnn_random	AT5G23020	MAM_L_MAM3_IMS2	-2.24835	0	-2.34873	-1.54221	-5.19824	-2.52754	-2.84264	-1.92551
glucosinolate metabolic process	GO:0019760	BnaC02g41790D	chrC02	AT5G23020	MAM_L_MAM3_IMS2	-1.89145	-1.44657	-2.0844	-1.73047	-4.94224	-2.50641	-2.64266	-1.71336
glucosinolate metabolic process	GO:0019760	BnaA05g36800D	chrA05_random	AT3G19710	BCAT4	-1.87361	-1.21562	-2.61596	-1.90489	-5.77806	-2.3223	-2.66492	-1.73487
glucosinolate metabolic process	GO:0019760	BnaC09g00410D	chrC09	AT4G03050	AOP3	-3.14107	-1.60397	-2.40043	-1.89633	-4.44596	-3.12341	-2.55063	-2.07198
glucosinolate metabolic process	GO:0019760	BnaC02g26740D	chrC02	AT4G03070	AOP1_AOP_AOP1_1	-4.5005	-3.27741	0	-3.69525	-4.40953	-5.19519	0	-2.26691
glucosinolate metabolic process	GO:0019760	BnaA09g01260D	chrA09	AT4G03050	AOP3	-4.06592	-1.71434	-3.36779	-1.91479	-4.26241	-2.72529	-3.39898	-2.18766
glucosinolate metabolic process	GO:0019760	BnaC09g05300D	chrC09	AT5G61420	MYB28_HAG1	-3.56569	-1.9529	-2.78477	-2.36175	-6.62369	-2.73957	-3.10738	-2.53307
glucosinolate metabolic process	GO:0019760	BnaA02g20860D	chrA02	AT4G03070	AOP1_AOP_AOP1_1	-5.19123	-3.15945	-3.04319	-3.18107	-5.06089	-2.97248	-2.83434	-1.88236
glucosinolate metabolic process	GO:0019760	BnaA03g39710D	chrA03	AT5G23010	MAM1_IMS3	-3.92874	-2.45066	-3.58586	-2.98056	-4.68689	-4.73836	-5.31529	-3.79074
glucosinolate metabolic process	GO:0019760	BnaC03g30450D	chrC03	AT4G03050	AOP3	-5.19623	-2.47774	-3.48982	-2.60324	-8.254	-2.39401	-4.8958	-2.84307
glucosinolate metabolic process	GO:0019760	BnaA03g57230D	chrA03_random	AT4G03050	AOP3	-5.15759	-2.95428	-3.8547	-2.9383	-7.80578	-3.41849	-5.13625	-3.39247
lipid metabolic process	GO:0006629	BnaC07g05630D	chrC07	AT2G16530	3_oxo_5_alpha_steroid_4_dehydrogenase_family_protein	0	0	0	0	1.79915	0	0	-0.851266
lipid metabolic process	GO:0006629	BnaC07g39860D	chrC07	AT4G25700	BETA_OHASE_1_B1_chy1_BCH1	0.720071	0.785584	0	0	-0.607005	0	0	0
lipid metabolic process	GO:0006629	BnaA03g47590D	chrA03	AT4G25700	BETA_OHASE_1_B1_chy1_BCH1	0.586899	0.676212	0	0	-0.584141	0	0	0
lipid metabolic process	GO:0006629	BnaC04g45430D	chrC04	AT2G37700	Fatty_acid_hydroxylase_superfamily	0	0	0	0	1.52762	0	-1.25393	0
lipid metabolic process	GO:0006629	BnaA05g06830D	chrA05	AT2G37700	Fatty_acid_hydroxylase_superfamily	0	0	0	0	-0.692316	0.712497	0	0
lipid metabolic process	GO:0006629	BnaC08g04910D	chrC08	AT1G45201	ATTLL1_TLL1	0	0	0	0	1.01096	-1.23752	0	0
lipid metabolic process	GO:0006629	BnaC03g33050D	chrC03	AT3G02590	Fatty_acid_hydroxylase_superfamily_protein	0	0	0	0	-0.510334	0	0	0
lipid metabolic process	GO:0006629	BnaA03g43960D	chrA03	AT4G19230	CYP707A1	0	0	0	0	0	-0.554648	0	0
lipid metabolic process	GO:0006629	BnaA08g17830D	chrA08	AT1G29660	GDSL_like_Lipase_Acylhydrolase_superfamily_protein	0	0	0	0	-0.670202	0	0	0
lipid metabolic process	GO:0006629	BnaA10g09300D	chrA10	AT1G08510	FATB	0	0	0	0	0	0	-0.693878	0
lipid metabolic process	GO:0006629	BnaC07g07970D	chrC07	AT3G23530	Cyclopropane_fatty_acyl_phospholipid_synthase	0	0	0	0	0	0	-0.714986	0
lipid metabolic process	GO:0006629	BnaAnng26510D	chrAnn_random	AT1G08510	FATB	0	0	0	0	0	0	-0.736225	0
lipid metabolic process	GO:0006629	BnaA01g03770D	chrA01	AT4G33120	S_adenosyl_L_methionine_dependent_methyltransferases_superfamily_protein	0	0	0	0	-0.742104	0	0	0
lipid metabolic process	GO:0006629	BnaC03g43340D	chrC03	AT3G23530	Cyclopropane_fatty_acyl_phospholipid_synthase	0	0	0	0	0	-0.759552	0	0
lipid metabolic process	GO:0006629	BnaC05g00450D	chrC05	AT1G01610	ATGPAT4_GPAT4	0	0	0	0	0	0	-0.796672	0
lipid metabolic process	GO:0006629	BnaC06g08850D	chrC06	AT1G51500	CER5_D3_ABCG12_WBC12_ATWBC12	0	0	0	0	0	0	-0.868849	0
lipid metabolic process	GO:0006629	BnaC04g07690D	chrC04	AT2G37700	Fatty_acid_hydroxylase_superfamily	0	0	0	0	-0.962914	0	0	0
lipid metabolic process	GO:0006629	BnaA01g30950D	chrA01	AT3G11210	SGNH_hydrolase_type_esterase_superfamily_protein	0	0	0	0	0	0	-0.967942	0
lipid metabolic process	GO:0006629	BnaA02g02930D	chrA02	AT5G16010	3_oxo_5_alpha_steroid_4_dehydrogenase_family_protein	0	0	0	0	0	0	0	-0.986496
lipid metabolic process	GO:0006629	BnaA08g08850D	chrA08	AT4G18550	alpha_beta_Hydrolases_superfamily_protein	0	0	0	0	-1.01083	0	0	0
lipid metabolic process	GO:0006629	BnaC03g62710D	chrC03	AT4G18550	alpha_beta_Hydrolases_superfamily_protein	0	0	0	0	0	0	0	-1.02337
lipid metabolic process	GO:0006629	BnaC08g43130D	chrC08	AT1G08510	FATB	0	0	0	0	-0.500641	0	-0.659849	0
lipid metabolic process	GO:0006629	BnaA01g31120D	chrA01	AT3G11210	SGNH_hydrolase_type_esterase_superfamily_protein	0	0	0	0	0	0	-1.29307	0
lipid metabolic process	GO:0006629	BnaA06g30720D	chrA06	AT3G30180	CYP85A2_BR6OX2	0	0	0	0	0	-1.34506	0	0
lipid metabolic process	GO:0006629	BnaA08g26890D	chrA08	AT1G08510	FATB	0	0	0	0	-0.624914	0	-0.780242	0
lipid metabolic process	GO:0006629	BnaCnng67650D	chrCnn_random	AT3G55940	Phosphoinositide_specific_phospholipase_C_family_protein	0	0	0	0	-0.75755	0	0	-0.728769
lipid metabolic process	GO:0006629	BnaCnng68190D	chrCnn_random	AT3G52940	FK_HYD2_ELL1	0	0	0	0	-0.579996	-0.523337	-0.503502	0
lipid metabolic process	GO:0006629	BnaC04g40500D	chrC04	AT2G29390	SMO2_2_ATSMO2	0	0	-0.88142	0	0	-0.748109	0	0
lipid metabolic process	GO:0006629	BnaA04g13700D	chrA04	AT2G23540	GDSL_like_Lipase_Acylhydrolase_superfamily_protein	0	0	0	0	0	-0.736118	0	-0.937187
lipid metabolic process	GO:0006629	BnaC05g11920D	chrC05	AT1G15550	GA4_ATGA3OX1_GA3OX1	0	0	0	0	-1.68567	0	0	0
lipid metabolic process	GO:0006629	BnaA08g28600D	chrA08	AT1G06360	Fatty_acid_desaturase_family_protein	0	0	0	0	-1.72433	0	0	0
lipid metabolic process	GO:0006629	BnaC04g28680D	chrC04	AT4G14440	ATECI3_ECI3_HCD1	0	0	0	0	-0.824224	0	-1.10167	0
lipid metabolic process	GO:0006629	BnaC09g49790D	chrC09	AT5G05690	CPD_CYP90A_CYP90_CBB3_DWF3_CYP90A1	-0.943491	0	0	0	0	-0.992529	0	0
lipid metabolic process	GO:0006629	BnaAnng11400D	chrAnn_random	AT1G45201	ATTLL1_TLL1	0	0	0	0	0	0	-2.06742	0
lipid metabolic process	GO:0006629	BnaC08g38040D	chrC08	AT1G17060	CYP72C1_SOB7	0	0	0	0	-1.19026	0	-0.944162	0
lipid metabolic process	GO:0006629	BnaC02g10430D	chrC02	AT5G58860	CYP86A1_CYP86	0	0	0	0	-1.26087	0	-0.903239	0
lipid metabolic process	GO:0006629	BnaA05g27790D	chrA05	AT3G11210	SGNH_hydrolase_type_esterase_superfamily_protein	-0.545342	0	0	0	-0.76765	0	-0.91011	0
lipid metabolic process	GO:0006629	BnaC03g46440D	chrC03	AT2G16530	3_oxo_5_alpha_steroid_4_dehydrogenase_family_protein	-1.23375	0	0	0	0	0	-1.03377	0
lipid metabolic process	GO:0006629	BnaA09g45190D	chrA09	AT1G17060	CYP72C1_SOB7	0	0	0	0	-1.24774	0	-1.09584	0
lipid metabolic process	GO:0006629	BnaC08g17160D	chrC08	AT1G17060	CYP72C1_SOB7	0	0	0	0	0	-1.05338	0	-1.39043
lipid metabolic process	GO:0006629	BnaA04g12720D	chrA04	AT2G22240	ATMIPS2_MIPS2_ATIPS2	0	0	0	0	0	-0.758356	-0.780986	-0.91437
lipid metabolic process	GO:0006629	BnaC02g15850D	chrC02	AT5G51310	2_oxoglutarate_	0	0	0	0	-1.08069	0	-1.46826	0
lipid metabolic process	GO:0006629	BnaCnng08770D	chrCnn_random	AT1G01610	ATGPAT4_GPAT4	0	0	0	0	-0.907077	0	-0.988645	-0.654802
lipid metabolic process	GO:0006629	BnaC05g06160D	chrC05	AT1G08510	FATB	0	0	0	0	-0.674401	-0.555941	-0.762916	-0.563008
lipid metabolic process	GO:0006629	BnaA07g06510D	chrA07	AT3G23530	Cyclopropane_fatty_acyl_phospholipid_synthase	0	0	0	0	0	-0.760327	-0.97656	-0.823872
lipid metabolic process	GO:0006629	BnaC05g00780D	chrC05	AT1G01120	KCS1	0	0	0	0	-1.25125	0	-0.778148	-0.621102
lipid metabolic process	GO:0006629	BnaA07g15910D	chrA07	AT3G52940	FK_HYD2_ELL1	-0.669089	0	0	0	-0.897307	-0.568284	-0.631305	0
lipid metabolic process	GO:0006629	BnaC05g48250D	chrC05	AT3G02630	Plant_stearoyl_acyl_carrier_protein_desaturase_family_protein	0	0	0	0	-1.68316	0	-1.11113	0
lipid metabolic process	GO:0006629	BnaC06g14310D	chrC06	AT3G52940	FK_HYD2_ELL1	-0.579666	0	0	0	-0.633984	-0.756571	-0.911792	0
lipid metabolic process	GO:0006629	BnaC04g34650D	chrC04	AT2G22240	ATMIPS2_MIPS2_ATIPS2	0	0	0	0	-1.25659	-0.875121	-0.866902	0
lipid metabolic process	GO:0006629	BnaCnng42960D	chrCnn_random	AT1G17060	CYP72C1_SOB7	0	0	0	0	-1.2326	0	-0.880024	-0.930999
lipid metabolic process	GO:0006629	BnaA06g33600D	chrA06	AT2G04020	GDSL_motif_esterase_acyltransferase_lipase	0	0	0	0	0	0	-1.54333	-1.50273
lipid metabolic process	GO:0006629	BnaCnng19590D	chrCnn_random	AT5G57800	FLP1_YRE_CER3_WAX2	0	0	0	0	-1.53359	0	-1.52108	0
lipid metabolic process	GO:0006629	BnaAnng17300D	chrAnn_random	AT5G58860	CYP86A1_CYP86	0	0	0	0	-1.41181	0	-1.0486	-0.648817
lipid metabolic process	GO:0006629	BnaA01g15040D	chrA01	AT4G25860	ORP4A	0	0	0	0	-1.94521	0	-1.22854	0
lipid metabolic process	GO:0006629	BnaC03g60130D	chrC03	AT4G38690	PLC_like_phosphodiesterases_superfamily_protein	0	0	0	0	-1.53136	0	-1.74388	0
lipid metabolic process	GO:0006629	BnaA02g07380D	chrA02	AT5G58860	CYP86A1_CYP86	0	0	0	0	-1.34922	0	-1.15313	-0.795826
lipid metabolic process	GO:0006629	BnaA04g15380D	chrA04	AT2G26250	FDH_KCS10	0	0	0	0	-1.7614	0	-1.56143	0
lipid metabolic process	GO:0006629	BnaC07g49710D	chrC07_random	AT5G23190	CYP86B1	0	0	0	0	-1.51015	0	-0.889149	-0.93595
lipid metabolic process	GO:0006629	BnaC05g00880D	chrC05	AT1G01020	ARV1	-0.696097	-0.544102	-0.503033	-0.532331	-0.502458	-0.560676	0	0
lipid metabolic process	GO:0006629	BnaC01g17770D	chrC01	AT4G25860	ORP4A	0	0	0	0	-0.900512	0	-1.59071	-0.849768
lipid metabolic process	GO:0006629	BnaA02g36750D	chrA02_random	AT5G43300	PLC_like_phosphodiesterases_superfamily_protein	0	0	0	0	-1.73258	-1.66933	0	0
lipid metabolic process	GO:0006629	BnaC05g04360D	chrC05	AT1G06360	Fatty_acid_desaturase_family_protein	0	0	0	0	-2.13368	0	-1.27058	0
lipid metabolic process	GO:0006629	BnaC01g42330D	chrC01_random	AT3G50400	GDSL_like_Lipase_Acylhydrolase_superfamily_protein	0	0	0	0	-0.980118	-0.750826	-0.900624	-0.786417
lipid metabolic process	GO:0006629	BnaA05g15230D	chrA05	AT1G51500	CER5_D3_ABCG12_WBC12_ATWBC12	-0.551627	0	0	0	-0.729217	-0.535123	-1.11109	-0.519475
lipid metabolic process	GO:0006629	BnaA09g17740D	chrA09	AT5G45670	GDSL_like_Lipase_Acylhydrolase_superfamily_protein	0	0	0	0	-2.11074	0	-1.35238	0
lipid metabolic process	GO:0006629	BnaC08g33100D	chrC08	AT2G26250	FDH_KCS10	0	0	0	0	-1.40045	0	-1.47647	-0.609156
lipid metabolic process	GO:0006629	BnaAnng05710D	chrAnn_random	AT5G45670	GDSL_like_Lipase_Acylhydrolase_superfamily_protein	0	0	0	0	-2.0415	0	-1.49208	0
lipid metabolic process	GO:0006629	BnaC02g48210D	chrC02_random	AT3G27950	GDSL_like_Lipase_Acylhydrolase_superfamily_protein	-0.706838	0	0	0	-1.01344	0	-0.716097	-1.10166
lipid metabolic process	GO:0006629	BnaA03g39540D	chrA03	AT5G23190	CYP86B1	0	0	0	0	-0.904224	-0.746116	-1.04572	-0.847124
lipid metabolic process	GO:0006629	BnaA10g00700D	chrA10	AT1G01120	KCS1	0	0	0	0	-1.59602	0	-1.36753	-0.637929
lipid metabolic process	GO:0006629	BnaA01g14940D	chrA01	AT4G25700	BETA_OHASE_1_B1_chy1_BCH1	0	0	0	0	-1.25265	-1.51215	-0.912022	0
lipid metabolic process	GO:0006629	BnaA09g51530D	chrA09	AT1G01120	KCS1	0	0	0	0	-1.57006	0	-1.40462	-0.770812
lipid metabolic process	GO:0006629	BnaC04g38330D	chrC04	AT2G26250	FDH_KCS10	0	0	0	0	-1.62423	0	-1.63078	-0.549338
lipid metabolic process	GO:0006629	BnaC01g05130D	chrC01	AT4G33120	S_adenosyl_L_methionine_dependent_methyltransferases_superfamily_protein	0	0	0	0	-1.41651	-1.0604	-0.825826	-0.517916
lipid metabolic process	GO:0006629	BnaA06g33540D	chrA06	AT3G25585	AAPT2_ATAAPT2	0	0	-0.553856	0	-0.629418	-1.02197	-1.03701	-0.622828
lipid metabolic process	GO:0006629	BnaA10g24860D	chrA10	AT5G05690	CPD_CYP90A_CYP90_CBB3_DWF3_CYP90A1	-1.065	0	0	0	-1.32838	-0.793978	-0.705376	0
lipid metabolic process	GO:0006629	BnaCnng00510D	chrCnn_random	AT2G04240	XERICO	0	0	0	0	-1.53776	0	-1.39651	-0.959597
lipid metabolic process	GO:0006629	BnaC03g42170D	chrC03	AT3G21500	NA	0	0	0	0	-1.56019	0	-1.30188	-1.04089
lipid metabolic process	GO:0006629	BnaC02g11200D	chrC02	AT5G57800	FLP1_YRE_CER3_WAX2	0	0	0	0	-1.61937	0	-1.64699	-0.66777
lipid metabolic process	GO:0006629	BnaCnng27420D	chrCnn_random	AT1G54010	GDSL_like_Lipase_Acylhydrolase_superfamily_protein	-0.647227	0	0	0	-1.17917	0	-1.16018	-0.973214
lipid metabolic process	GO:0006629	BnaA05g16170D	chrA05	AT1G49430	LACS2_LRD2	-0.504962	0	0	0	-1.12573	-0.775158	-0.891906	-0.725455
lipid metabolic process	GO:0006629	BnaA06g10250D	chrA06	AT1G15550	GA4_ATGA3OX1_GA3OX1	0	0	0	0	0	-2.09934	-1.94923	0
lipid metabolic process	GO:0006629	BnaA06g04900D	chrA06	AT1G08510	FATB	0	0	0	0	-1.13561	-1.02329	-1.04341	-0.852276
lipid metabolic process	GO:0006629	BnaA07g04670D	chrA07	AT2G04240	XERICO	0	0	0	0	-1.63013	0	-1.61352	-0.851033
lipid metabolic process	GO:0006629	BnaC08g46130D	chrC08	AT1G01120	KCS1	0	0	0	0	-1.70275	0	-1.56841	-0.828938
lipid metabolic process	GO:0006629	BnaC07g22750D	chrC07	AT3G25585	AAPT2_ATAAPT2	0	0	0	0	-0.776077	-0.679711	-1.60843	-1.07715
lipid metabolic process	GO:0006629	BnaC01g10960D	chrC01	AT4G18550	alpha_beta_Hydrolases_superfamily_protein	-0.906567	0	0	0	0	-1.11703	-1.07042	-1.05463
lipid metabolic process	GO:0006629	BnaAnng24600D	chrAnn_random	AT3G02590	Fatty_acid_hydroxylase_superfamily_protein	0	0	0	0	-2.03709	0	-2.11754	0
lipid metabolic process	GO:0006629	BnaA10g28190D	chrA10_random	AT1G45201	ATTLL1_TLL1	0	0	0	0	-0.984271	0	-1.43169	-1.75014
lipid metabolic process	GO:0006629	BnaAnng25600D	chrAnn_random	AT1G17060	CYP72C1_SOB7	0	0	0	0	-1.37928	-0.667511	-1.10037	-1.02034
lipid metabolic process	GO:0006629	BnaC02g28510D	chrC02	AT4G12110	SMO1_1_ATSMO1_ATSMO1_1	0	0	0	0	-1.24862	0	-1.3698	-1.56331
lipid metabolic process	GO:0006629	BnaC01g05640D	chrC01	AT4G32770	VTE1_ATSDX1	0	0	0	0	-1.01123	0	-2.1768	-1.00047
lipid metabolic process	GO:0006629	BnaC08g44620D	chrC08	AT1G06360	Fatty_acid_desaturase_family_protein	0	0	0	0	-2.62525	0	-1.56878	0
lipid metabolic process	GO:0006629	BnaA01g21260D	chrA01	AT3G50400	GDSL_like_Lipase_Acylhydrolase_superfamily_protein	0	0	0	0	-1.10705	-0.682105	-1.25779	-1.155
lipid metabolic process	GO:0006629	BnaC04g27640D	chrC04	AT3G53100	GDSL_like_Lipase_Acylhydrolase_superfamily_protein	0	0	0	0	-1.64502	-0.925545	-0.85691	-0.781944
lipid metabolic process	GO:0006629	BnaA10g28080D	chrA10_random	AT1G06350	Fatty_acid_desaturase_family_protein	0	0	0	0	-2.59586	0	-1.62042	0
lipid metabolic process	GO:0006629	BnaA04g00580D	chrA04	AT3G61680	alpha_beta_Hydrolases_superfamily_protein	-0.849385	0	-0.656121	0	-1.0209	-0.774149	-0.931474	0
lipid metabolic process	GO:0006629	BnaC05g51350D	chrC05_random	AT1G49430	LACS2_LRD2	-0.707298	0	0	0	-0.998363	-0.901175	-1.02359	-0.659349
lipid metabolic process	GO:0006629	BnaC04g19410D	chrC04	AT1G62290	Saposin_like_aspartyl_protease_family_protein	0	0	0	0	0	-1.50647	-1.28674	-1.5768
lipid metabolic process	GO:0006629	BnaC02g02210D	chrC02	AT5G05690	CPD_CYP90A_CYP90_CBB3_DWF3_CYP90A1	0	0	0	0	-1.86017	0	-2.5413	0
lipid metabolic process	GO:0006629	BnaA01g34710D	chrA01_random	AT4G39800	MI_1_P_SYNTHASE_MIPS1_ATMIPS1_ATIPS1	-0.740344	0	0	0	-1.43808	-0.952811	-1.28705	0
lipid metabolic process	GO:0006629	BnaAnng35560D	chrAnn_random	AT2G40250	SGNH_hydrolase_type_esterase_superfamily_protein	0	0	0	0	-2.12777	0	-2.29546	0
lipid metabolic process	GO:0006629	BnaC07g04810D	chrC07	AT2G15090	KCS8	0	0	0	0	-1.92632	0	-1.48925	-1.01042
lipid metabolic process	GO:0006629	BnaA09g35480D	chrA09	AT3G55940	Phosphoinositide_specific_phospholipase_C_family_protein	0	0	0	0	-1.48898	-0.842359	-0.870216	-1.22868
lipid metabolic process	GO:0006629	BnaA10g00370D	chrA10	AT1G01610	ATGPAT4_GPAT4	-0.64446	0	0	0	-1.46042	0	-1.28938	-1.08969
lipid metabolic process	GO:0006629	BnaC03g12340D	chrC03	AT5G58860	CYP86A1_CYP86	0	0	0	0	-1.65121	-0.76406	-1.31615	-0.763311
lipid metabolic process	GO:0006629	BnaAnng15340D	chrAnn_random	AT4G34920	PLC_like_phosphodiesterases_superfamily_protein	-0.822395	0	0	0	-1.36301	0	-0.987674	-1.33256
lipid metabolic process	GO:0006629	BnaA08g16950D	chrA08	AT4G38690	PLC_like_phosphodiesterases_superfamily_protein	0	0	0	0	-1.81292	0	-2.0099	-0.707151
lipid metabolic process	GO:0006629	BnaA03g41900D	chrA03	AT4G15440	HPL1_CYP74B2	-2.46257	0	-2.0693	0	0	0	0	0
lipid metabolic process	GO:0006629	BnaA04g28650D	chrA04_random	AT2G29390	SMO2_2_ATSMO2	-0.650757	0	-0.67278	-0.703391	-0.629674	-1.35709	-0.534587	0
lipid metabolic process	GO:0006629	BnaC01g00680D	chrC01	AT4G39800	MI_1_P_SYNTHASE_MIPS1_ATMIPS1_ATIPS1	-0.873786	0	0	0	-1.21225	-1.1424	-1.32985	0
lipid metabolic process	GO:0006629	BnaC01g37130D	chrC01	AT3G14220	GDSL_like_Lipase_Acylhydrolase_superfamily_protein	-0.666045	0	0	0	-1.34032	-1.12557	-0.778283	-0.741647
lipid metabolic process	GO:0006629	BnaC03g20900D	chrC03	AT2G37700	Fatty_acid_hydroxylase_superfamily	0	0	0	0	-2.89227	0	-1.76454	0
lipid metabolic process	GO:0006629	BnaA07g15920D	chrA07	AT3G52940	FK_HYD2_ELL1	-0.78089	0	-0.578574	0	-0.862686	-0.803409	-1.00738	-0.62445
lipid metabolic process	GO:0006629	BnaA05g33500D	chrA05	AT3G02630	Plant_stearoyl_acyl_carrier_protein_desaturase_family_protein	0	0	0	0	-1.88939	0	-1.44555	-1.37573
lipid metabolic process	GO:0006629	BnaA09g50070D	chrA09	AT1G06090	Fatty_acid_desaturase_family_protein	-0.84695	0	0	0	-2.28442	0	-1.60928	0
lipid metabolic process	GO:0006629	BnaC03g65700D	chrC03	AT4G34920	PLC_like_phosphodiesterases_superfamily_protein	0	0	0	0	-1.31297	-1.31115	-0.836977	-1.28262
lipid metabolic process	GO:0006629	BnaC09g04540D	chrC09	AT5G24160	Squalene_monooxygenase_6	0	0	0	0	-1.78718	0	-1.3274	-1.68763
lipid metabolic process	GO:0006629	BnaA02g32980D	chrA02	AT5G23190	CYP86B1	0	0	0	0	-2.00454	0	-1.22016	-1.5806
lipid metabolic process	GO:0006629	BnaC09g18630D	chrC09	AT5G45670	GDSL_like_Lipase_Acylhydrolase_superfamily_protein	0	0	0	0	-1.79903	-0.527476	-1.68155	-0.821054
lipid metabolic process	GO:0006629	BnaA07g39250D	chrA07_random	AT1G78390	NCED9_ATNCED9	0	0	0	0	-2.68248	0	-2.21658	0
lipid metabolic process	GO:0006629	BnaA08g29150D	chrA08_random	AT1G54000	GDSL_like_Lipase_Acylhydrolase_superfamily_protein	0	0	0	0	-2.43241	0	-1.488	-1.00373
lipid metabolic process	GO:0006629	BnaC08g49140D	chrC08_random	AT1G78500	Terpenoid_cyclases_family_protein	0	0	0	0	-2.5544	0	-2.37863	0
lipid metabolic process	GO:0006629	BnaC02g41740D	chrC02	AT5G23190	CYP86B1	0	0	0	0	-1.59026	-0.810726	-1.26992	-1.29367
lipid metabolic process	GO:0006629	BnaC09g10950D	chrC09	AT1G62940	ACOS5	-0.818534	0	0	0	-1.31838	-1.17675	-0.886658	-0.816309
lipid metabolic process	GO:0006629	BnaA02g08090D	chrA02	AT5G57800	FLP1_YRE_CER3_WAX2	0	0	0	0	-1.81671	-0.57045	-1.77551	-0.86304
lipid metabolic process	GO:0006629	BnaC08g34430D	chrC08	AT2G23540	GDSL_like_Lipase_Acylhydrolase_superfamily_protein	-0.71269	0	0	0	-1.38667	-0.996695	-1.08383	-0.867715
lipid metabolic process	GO:0006629	BnaA04g06040D	chrA04	AT4G14440	ATECI3_ECI3_HCD1	-1.19961	0	0	0	-1.40931	0	-1.37754	-1.07496
lipid metabolic process	GO:0006629	BnaC06g22960D	chrC06	AT1G74460	GDSL_like_Lipase_Acylhydrolase_superfamily_protein	-0.719896	0	0	0	-1.71689	-0.798869	-1.11012	-0.722236
lipid metabolic process	GO:0006629	BnaA02g11310D	chrA02	AT5G51310	2_oxoglutarate_	0	0	0	0	-2.26831	0	-1.49283	-1.34127
lipid metabolic process	GO:0006629	BnaA02g00400D	chrA02	AT5G10170	ATMIPS3_MIPS3	0	0	0	0	-1.36732	-0.986047	-1.60057	-1.16896
lipid metabolic process	GO:0006629	BnaC04g00950D	chrC04	AT2G46210	Fatty_acid_sphingolipid_desaturase	0	0	0	0	-2.72235	0	-2.4076	0
lipid metabolic process	GO:0006629	BnaCnng54600D	chrCnn_random	AT3G23530	Cyclopropane_fatty_acyl_phospholipid_synthase	-0.802878	0	0	0	-0.737995	-0.934955	-1.41141	-1.25164
lipid metabolic process	GO:0006629	BnaA03g17370D	chrA03	AT2G37700	Fatty_acid_hydroxylase_superfamily	-1.08476	0	0	0	-1.20115	-1.54459	-1.35633	0
lipid metabolic process	GO:0006629	BnaCnng34700D	chrCnn_random	AT5G45670	GDSL_like_Lipase_Acylhydrolase_superfamily_protein	-0.708172	0	0	0	-1.68621	-0.928503	-1.1888	-0.702697
lipid metabolic process	GO:0006629	BnaC05g02350D	chrC05	AT1G04220	KCS2	0	0	0	0	-1.91101	-1.00099	-1.52873	-0.795822
lipid metabolic process	GO:0006629	BnaC04g30380D	chrC04	AT5G37690	SGNH_hydrolase_type_esterase_superfamily_protein	0	0	0	0	-1.92488	-0.760555	-1.50107	-1.07503
lipid metabolic process	GO:0006629	BnaA02g29130D	chrA02	AT3G27950	GDSL_like_Lipase_Acylhydrolase_superfamily_protein	-0.788054	0	-0.818193	0	-1.33202	0	-0.997005	-1.3333
lipid metabolic process	GO:0006629	BnaA10g00820D	chrA10	AT1G01020	ARV1	-1.13607	-0.967324	0	0	-1.20889	-1.30188	0	-0.68411
lipid metabolic process	GO:0006629	BnaA04g04900D	chrA04	AT3G53100	GDSL_like_Lipase_Acylhydrolase_superfamily_protein	0	0	0	0	-1.95553	-1.11821	-1.39078	-0.874678
lipid metabolic process	GO:0006629	BnaA10g02480D	chrA10	AT1G04220	KCS2	0	0	0	0	-2.07715	-0.864241	-1.62792	-0.780102
lipid metabolic process	GO:0006629	BnaA01g02870D	chrA01	AT4G34250	KCS16	0	0	0	0	-1.92209	0	-2.51725	-0.943364
lipid metabolic process	GO:0006629	BnaA09g02720D	chrA09	AT3G30180	CYP85A2_BR6OX2	-2.2617	0	0	0	-1.78159	0	-1.34934	0
lipid metabolic process	GO:0006629	BnaC02g22890D	chrC02	AT1G74460	GDSL_like_Lipase_Acylhydrolase_superfamily_protein	-1.03424	0	0	0	-1.50568	-1.04286	-1.03852	-0.791286
lipid metabolic process	GO:0006629	BnaA07g22220D	chrA07	AT1G74460	GDSL_like_Lipase_Acylhydrolase_superfamily_protein	-0.788321	0	0	0	-1.80313	-0.961719	-1.15021	-0.719924
lipid metabolic process	GO:0006629	BnaA08g23390D	chrA08	AT1G17060	CYP72C1_SOB7	0	0	0	0	-1.70064	0	-1.50781	-2.2306
lipid metabolic process	GO:0006629	BnaA04g01840D	chrA04	AT3G58750	CSY2	0	0	0	0	-2.19509	0	-1.95415	-1.32276
lipid metabolic process	GO:0006629	BnaA10g11680D	chrA10	AT5G57800	FLP1_YRE_CER3_WAX2	-0.688914	0	0	0	-1.82853	-0.70372	-1.56328	-0.70289
lipid metabolic process	GO:0006629	BnaA09g41930D	chrA09	AT2G23540	GDSL_like_Lipase_Acylhydrolase_superfamily_protein	-0.804321	0	0	0	-1.60354	-1.02269	-1.08763	-0.977063
lipid metabolic process	GO:0006629	BnaA03g36320D	chrA03	AT3G21500	NA	0	0	0	0	-2.19017	-1.56678	-1.73838	0
lipid metabolic process	GO:0006629	BnaC03g59260D	chrC03	AT1G29660	GDSL_like_Lipase_Acylhydrolase_superfamily_protein	-0.645588	0	0	0	-1.63718	-0.863136	-1.61981	-0.748253
lipid metabolic process	GO:0006629	BnaA04g08210D	chrA04	AT5G37690	SGNH_hydrolase_type_esterase_superfamily_protein	0	0	0	0	-1.83613	-0.663779	-1.76024	-1.25906
lipid metabolic process	GO:0006629	BnaC05g04370D	chrC05	AT1G06310	ACX6	0	0	0	0	-2.25116	-1.21468	-2.10589	0
lipid metabolic process	GO:0006629	BnaC03g46430D	chrC03	AT2G16530	3_oxo_5_alpha_steroid_4_dehydrogenase_family_protein	0	0	0	0	-1.86355	0	-2.35049	-1.37937
lipid metabolic process	GO:0006629	BnaAnng38120D	chrAnn_random	AT5G58860	CYP86A1_CYP86	-0.799998	0	0	0	-1.73943	-0.740926	-1.41988	-0.928748
lipid metabolic process	GO:0006629	BnaC05g04380D	chrC05	AT1G06360	Fatty_acid_desaturase_family_protein	0	0	0	0	-1.67348	0	-2.26103	-1.70246
lipid metabolic process	GO:0006629	BnaA04g29150D	chrA04_random	AT2G37700	Fatty_acid_hydroxylase_superfamily	0	0	0	0	-2.61928	-1.52403	-1.55067	0
lipid metabolic process	GO:0006629	BnaA02g35910D	chrA02_random	AT1G74460	GDSL_like_Lipase_Acylhydrolase_superfamily_protein	-0.918119	0	0	0	-1.86123	-1.08493	-1.10099	-0.753927
lipid metabolic process	GO:0006629	BnaC02g00460D	chrC02	AT5G10170	ATMIPS3_MIPS3	0	0	0	0	-1.55766	-1.06561	-1.64072	-1.47725
lipid metabolic process	GO:0006629	BnaA01g15910D	chrA01	AT4G26790	GDSL_like_Lipase_Acylhydrolase_superfamily_protein	0	0	0	0	-2.77588	-1.61784	-1.39215	0
lipid metabolic process	GO:0006629	BnaC01g19020D	chrC01	AT4G26790	GDSL_like_Lipase_Acylhydrolase_superfamily_protein	-0.837099	0	0	0	-1.47633	-0.9793	-1.33002	-1.18608
lipid metabolic process	GO:0006629	BnaA03g28030D	chrA03	AT3G02590	Fatty_acid_hydroxylase_superfamily_protein	0	0	0	0	-2.60004	0	-1.94703	-1.27323
lipid metabolic process	GO:0006629	BnaC06g10390D	chrC06	AT1G54010	GDSL_like_Lipase_Acylhydrolase_superfamily_protein	0	0	0	0	-2.73877	0	-1.95348	-1.15871
lipid metabolic process	GO:0006629	BnaC03g33060D	chrC03	AT3G02590	Fatty_acid_hydroxylase_superfamily_protein	0	0	0	0	-2.81218	-1.72913	-1.33665	0
lipid metabolic process	GO:0006629	BnaC02g29350D	chrC02	AT4G10060	Beta_glucosidase_GBA2_type_family_protein	0	0	0	0	-1.48641	-1.26731	-1.92156	-1.20273
lipid metabolic process	GO:0006629	BnaC04g21650D	chrC04	AT3G61680	alpha_beta_Hydrolases_superfamily_protein	-1.00675	0	0	0	-1.52596	-0.993558	-1.47953	-0.919458
lipid metabolic process	GO:0006629	BnaA02g21480D	chrA02	AT4G12110	SMO1_1_ATSMO1_ATSMO1_1	0	0	0	0	-2.13268	0	-2.06405	-1.89517
lipid metabolic process	GO:0006629	BnaA04g26150D	chrA04	AT2G45400	BEN1	-0.936332	0	-0.723439	0	-1.6897	-1.21409	-1.00447	-0.616664
lipid metabolic process	GO:0006629	BnaC09g41840D	chrC09	AT5G16010	3_oxo_5_alpha_steroid_4_dehydrogenase_family_protein	0	0	-0.823878	0	-1.43352	-1.50912	-1.26018	-1.2426
lipid metabolic process	GO:0006629	BnaC05g36950D	chrC05	AT3G16370	GDSL_like_Lipase_Acylhydrolase_superfamily_protein	-0.594606	0	-0.534526	0	-2.16266	-0.957672	-1.35355	-0.716346
lipid metabolic process	GO:0006629	BnaC01g04130D	chrC01	AT4G34250	KCS16	0	0	0	0	-3.02656	0	-2.08821	-1.25034
lipid metabolic process	GO:0006629	BnaC07g44090D	chrC07	AT4G33120	S_adenosyl_L_methionine_dependent_methyltransferases_superfamily_protein	-0.573063	0	0	-0.628087	-1.77635	-1.2253	-1.43572	-0.727881
lipid metabolic process	GO:0006629	BnaA10g28100D	chrA10_random	AT1G06360	Fatty_acid_desaturase_family_protein	0	0	0	0	-1.27847	-1.14026	-2.38963	-1.57326
lipid metabolic process	GO:0006629	BnaA01g15030D	chrA01	AT4G25860	ORP4A	-1.25092	0	0	0	-2.80191	-1.06943	-1.25984	0
lipid metabolic process	GO:0006629	BnaC03g12730D	chrC03	AT5G57800	FLP1_YRE_CER3_WAX2	0	0	0	0	-2.39299	0	-2.2544	-1.74608
lipid metabolic process	GO:0006629	BnaA07g08280D	chrA07	AT1G28610	GGL3	0	0	0	0	-2.14624	-1.6137	-1.81088	-0.894211
lipid metabolic process	GO:0006629	BnaAnng01430D	chrAnn_random	AT5G05690	CPD_CYP90A_CYP90_CBB3_DWF3_CYP90A1	-1.22343	0	0	0	-1.84088	0	-1.87409	-1.63274
lipid metabolic process	GO:0006629	BnaA05g04830D	chrA05	AT2G45400	BEN1	-0.907773	0	-0.719536	0	-2.24752	-0.712776	-1.35329	-0.642156
lipid metabolic process	GO:0006629	BnaC05g41970D	chrC05	AT3G11210	SGNH_hydrolase_type_esterase_superfamily_protein	0	0	0	0	-2.06322	-0.993532	-2.3409	-1.20919
lipid metabolic process	GO:0006629	BnaC06g38870D	chrC06	AT1G78390	NCED9_ATNCED9	0	0	0	0	-1.99887	-1.27026	-2.07055	-1.32146
lipid metabolic process	GO:0006629	BnaC01g17610D	chrC01	AT4G25700	BETA_OHASE_1_B1_chy1_BCH1	0	0	0	0	-1.96259	-1.30667	-1.93488	-1.55403
lipid metabolic process	GO:0006629	BnaC07g09690D	chrC07	AT1G29660	GDSL_like_Lipase_Acylhydrolase_superfamily_protein	0	0	0	0	-3.33381	-1.41336	-2.0382	0
lipid metabolic process	GO:0006629	BnaCnng74890D	chrCnn_random	AT1G01610	ATGPAT4_GPAT4	0	0	0	0	-2.31108	-1.17922	-2.21786	-1.07846
lipid metabolic process	GO:0006629	BnaC02g10440D	chrC02	AT5G58860	CYP86A1_CYP86	-1.18045	0	0	0	-2.5682	0	-1.46709	-1.58551
lipid metabolic process	GO:0006629	BnaA01g29500D	chrA01	AT3G14220	GDSL_like_Lipase_Acylhydrolase_superfamily_protein	-0.839465	0	-0.694954	0	-2.04293	-1.17843	-1.27603	-0.820899
lipid metabolic process	GO:0006629	BnaC09g52360D	chrC09_random	AT2G03760	ST_ATST1_RAR047_ST1_AtSOT1_AtSOT12_SOT12	0	0	0	0	-2.26021	-1.5699	-1.8386	-1.22192
lipid metabolic process	GO:0006629	BnaA05g14080D	chrA05	AT1G54010	GDSL_like_Lipase_Acylhydrolase_superfamily_protein	0	0	0	0	-2.87984	-0.888037	-2.04731	-1.2587
lipid metabolic process	GO:0006629	BnaA05g36890D	chrA05_random	AT3G16370	GDSL_like_Lipase_Acylhydrolase_superfamily_protein	-0.71904	0	-0.556988	0	-2.29766	-1.13979	-1.62456	-0.778957
lipid metabolic process	GO:0006629	BnaA09g50060D	chrA09	AT1G06360	Fatty_acid_desaturase_family_protein	0	0	0	0	-3.65519	-1.82273	-1.74665	0
lipid metabolic process	GO:0006629	BnaA01g23810D	chrA01	AT3G23530	Cyclopropane_fatty_acyl_phospholipid_synthase	0	0	0	0	-2.42828	-2.12714	-1.32839	-1.46155
lipid metabolic process	GO:0006629	BnaA02g23500D	chrA02	AT4G10060	Beta_glucosidase_GBA2_type_family_protein	0	0	0	0	-1.77574	-1.50977	-2.78008	-1.36926
lipid metabolic process	GO:0006629	BnaCnng46190D	chrCnn_random	AT5G43300	PLC_like_phosphodiesterases_superfamily_protein	0	0	0	0	-1.65225	-2.25566	-1.73351	-1.89014
lipid metabolic process	GO:0006629	BnaA09g40640D	chrA09	AT2G26250	FDH_KCS10	-0.832171	0	0	0	-2.49738	-1.16537	-1.69034	-1.42506
lipid metabolic process	GO:0006629	BnaAnng27240D	chrAnn_random	AT4G19230	CYP707A1	-1.81497	0	-1.45491	0	-1.61643	0	-1.2806	-1.47607
lipid metabolic process	GO:0006629	BnaC07g22670D	chrC07	AT2G04020	GDSL_motif_esterase_acyltransferase_lipase	0	0	0	0	-2.18757	-1.98787	-2.13446	-1.34339
lipid metabolic process	GO:0006629	BnaC04g53100D	chrC04_random	AT2G45400	BEN1	-0.983835	0	-0.766659	0	-2.14479	-1.36342	-1.73865	-0.856561
lipid metabolic process	GO:0006629	BnaC07g10250D	chrC07	AT1G28610	GGL3	-1.17143	0	0	0	-2.31891	-1.67015	-1.67028	-1.25721
lipid metabolic process	GO:0006629	BnaC04g56940D	chrC04_random	AT2G45400	BEN1	-1.23782	0	-0.772708	0	-2.21814	-1.28121	-1.55618	-1.07811
lipid metabolic process	GO:0006629	BnaC04g11110D	chrC04	AT2G33380	RD20_CLO_3	-0.99828	-1.47329	0	0	-1.27049	-2.03405	-1.41462	-1.02579
lipid metabolic process	GO:0006629	BnaA05g25230D	chrA05	AT3G14220	GDSL_like_Lipase_Acylhydrolase_superfamily_protein	-1.13851	0	-0.954084	0	-2.39236	-1.16794	-1.39274	-1.23431
lipid metabolic process	GO:0006629	BnaC09g53740D	chrC09_random	AT5G58784	Undecaprenyl_pyrophosphate_synthetase_family_protein	-1.34587	0	0	0	-3.22377	-1.82653	-1.91175	0
lipid metabolic process	GO:0006629	BnaA06g01130D	chrA06	AT1G53130	GRI	-1.26052	-1.49329	-1.62149	0	0	-2.05328	0	-1.90638
lipid metabolic process	GO:0006629	BnaC03g12740D	chrC03	AT5G57800	FLP1_YRE_CER3_WAX2	-1.52933	0	0	0	-2.80155	-1.65267	-2.45288	0
lipid metabolic process	GO:0006629	BnaA05g01010D	chrA05	AT2G46890	Protein_of_unknown_function_	-1.5853	0	-1.13718	0	-1.80491	-1.35812	-1.72331	-0.833384
lipid metabolic process	GO:0006629	BnaA03g58390D	chrA03_random	AT4G18780	CESA8_IRX1_ATCESA8_LEW2	-1.17129	0	-0.824433	0	-2.18124	-1.82841	-1.5653	-1.13805
lipid metabolic process	GO:0006629	BnaC07g50180D	chrC07_random	AT4G18780	CESA8_IRX1_ATCESA8_LEW2	-1.14754	0	-0.779613	0	-2.55152	-1.66871	-1.5718	-1.03277
lipid metabolic process	GO:0006629	BnaA09g20460D	chrA09	AT4G04460	Saposin_like_aspartyl_protease_family_protein	-1.0152	0	0	0	-2.73406	-1.46994	-2.33181	-1.54955
lipid metabolic process	GO:0006629	BnaC06g04590D	chrC06	AT1G51500	CER5_D3_ABCG12_WBC12_ATWBC12	-0.967745	0	0	0	-2.93224	-2.1593	-1.88103	-1.31568
lipid metabolic process	GO:0006629	BnaC05g39470D	chrC05	AT3G14220	GDSL_like_Lipase_Acylhydrolase_superfamily_protein	-1.36146	0	-1.13068	0	-2.68322	-1.33386	-1.79931	-1.48946
lipid metabolic process	GO:0006629	BnaA10g28090D	chrA10_random	AT1G06310	ACX6	-0.926923	0	0	0	-3.77457	-1.47113	-2.57998	-1.05408
lipid metabolic process	GO:0006629	BnaC09g22820D	chrC09	AT4G04460	Saposin_like_aspartyl_protease_family_protein	-1.25148	0	-0.95435	0	-2.53691	-1.53865	-2.31862	-1.53178
lipid metabolic process	GO:0006629	BnaA10g29570D	chrA10_random	AT5G58784	Undecaprenyl_pyrophosphate_synthetase_family_protein	-1.32484	0	0	0	-4.45233	-1.93759	-1.50559	-1.06903
lipid metabolic process	GO:0006629	BnaA04g11490D	chrA04	AT5G38970	BR6OX1_ATBR6OX_CYP85A1_BR6OX	-1.36971	0	0	0	-5.1772	-1.23513	-1.59604	-0.939698
lipid metabolic process	GO:0006629	BnaA08g11440D	chrA08	AT4G33790	CER4_G7_FAR3	-2.51737	0	0	0	-4.39037	0	-2.47078	-1.43962
lipid metabolic process	GO:0006629	BnaA03g10100D	chrA03	AT5G57800	FLP1_YRE_CER3_WAX2	-1.52105	0	0	0	-5.7784	-1.61305	-2.1309	0
lipid metabolic process	GO:0006629	BnaC07g23000D	chrC07	AT3G25830	ATTPS_CIN_TPS_CIN	-1.47914	0	0	0	-3.5228	-2.27251	-1.86017	-1.9863
lipid metabolic process	GO:0006629	BnaA06g33340D	chrA06	AT3G25830	ATTPS_CIN_TPS_CIN	0	0	0	0	-4.89457	-1.91299	-2.24876	-2.92162
lipid metabolic process	GO:0006629	BnaA02g07460D	chrA02	AT5G58784	Undecaprenyl_pyrophosphate_synthetase_family_protein	-1.82339	0	0	-1.20601	-3.33646	-1.86179	-3.03019	-1.59211
lipid metabolic process	GO:0006629	BnaA05g10200D	chrA05	AT2G33380	RD20_CLO_3	-2.77391	0	-2.06351	0	-2.53966	-4.06971	-1.98517	-2.23436
lipid metabolic process	GO:0006629	BnaC01g05600D	chrC01	AT4G32810	CCD8_MAX4_ATCCD8	-2.76259	0	-1.68481	0	-3.17575	-2.94921	-3.25066	-2.13714
lipid metabolic process	GO:0006629	BnaA01g04140D	chrA01	AT4G32810	CCD8_MAX4_ATCCD8	-1.69385	0	-1.84979	0	-3.7218	-2.78835	-3.7335	-3.28726
lipid metabolic process	GO:0006629	BnaCnng38630D	chrCnn_random	AT3G45140	LOX2_ATLOX2	-4.85969	0	-2.99674	-2.42127	0	0	-2.82613	-4.196
lipid metabolic process	GO:0006629	BnaC08g35240D	chrC08	AT2G22240	ATMIPS2_MIPS2_ATIPS2	-2.10256	-1.26494	-1.96761	-1.15236	-2.69785	-2.74705	-3.06801	-2.41943
lipid metabolic process	GO:0006629	BnaA09g42760D	chrA09	AT2G22240	ATMIPS2_MIPS2_ATIPS2	-2.48188	-1.4056	-2.05064	-1.5255	-3.39484	-2.81611	-3.13068	-2.88353
lipid metabolic process	GO:0006629	BnaA02g37020D	chrA02_random	AT5G24160	Squalene_monooxygenase_6	-3.51789	0	-2.50515	-1.80211	-4.29467	-3.80096	-1.80947	-3.03943
lipid metabolic process	GO:0006629	BnaA07g39210D	chrA07_random	AT1G78440	ATGA2OX1_GA2OX1	-1.87585	0	-2.51295	-1.86583	-7.85744	-3.95437	-5.42576	-3.35205
lipid metabolic process	GO:0006629	BnaA07g39200D	chrA07_random	AT1G78440	ATGA2OX1_GA2OX1	-4.76983	-7.1555	-3.01989	-3.19079	-8.42566	-5.86865	-5.44545	-8.20292
protein amino acid phosphorylation	GO:0006468	BnaC01g07320D	chrC01	AT4G31110	Wall_associated_kinase_family_protein	10.6619	7.45796	6.60639	8.9422	6.20973	6.26071	8.56664	6.24714
protein amino acid phosphorylation	GO:0006468	BnaA07g20220D	chrA07	AT1G79680	WAKL10_ATWAKL10	9.30607	5.15224	7.38875	5.32345	6.32414	6.62046	9.44241	7.08114
protein amino acid phosphorylation	GO:0006468	BnaC08g16900D	chrC08	AT1G16260	Wall_associated_kinase_family_protein	6.15195	7.58436	3.9031	6.82814	4.92543	5.0201	9.18096	5.46083
protein amino acid phosphorylation	GO:0006468	BnaCnng25710D	chrCnn_random	AT4G04510	CRK38	8.5128	4.104	7.64342	5.14708	5.41649	2.94275	7.14818	7.81279
protein amino acid phosphorylation	GO:0006468	BnaA02g06950D	chrA02	AT5G59670	Leucine_rich_repeat_protein_kinase_family_protein	6.72828	6.10759	5.47402	6.39717	5.84973	6.14246	5.60578	5.6477
protein amino acid phosphorylation	GO:0006468	BnaC07g38040D	chrC07	AT4G23320	CRK24	4.56072	5.32426	5.0727	3.42694	7.28726	7.30176	9.03824	4.91329
protein amino acid phosphorylation	GO:0006468	BnaC02g44410D	chrC02_random	AT5G59670	Leucine_rich_repeat_protein_kinase_family_protein	6.20326	6.3452	5.10899	5.7484	5.80777	5.39795	5.19018	5.61854
protein amino acid phosphorylation	GO:0006468	BnaA03g45820D	chrA03	AT4G23230	CRK15	6.40563	6.94417	5.85672	5.21837	5.03086	4.17016	5.76611	5.31796
protein amino acid phosphorylation	GO:0006468	BnaC05g27560D	chrC05	AT1G35710	Protein_kinase_family_protein_with_leucine_rich_repeat_domain	5.58021	6.56793	5.23258	5.38669	5.05415	4.35869	6.00105	5.39684
protein amino acid phosphorylation	GO:0006468	BnaA04g08980D	chrA04	AT5G39030	Protein_kinase_superfamily_protein	5.12564	6.25624	4.50384	5.47677	5.50909	5.24209	5.47197	5.81126
protein amino acid phosphorylation	GO:0006468	BnaCnng48350D	chrCnn_random	AT3G47090	Leucine_rich_repeat_protein_kinase_family_protein	6.41784	7.86049	3.78179	4.76631	6.42922	4.21691	3.92922	4.52563
protein amino acid phosphorylation	GO:0006468	BnaC06g19670D	chrC06	AT1G79680	WAKL10_ATWAKL10	3.61376	4.061	6.68804	5.04336	6.17397	4.68132	4.70702	5.78091
protein amino acid phosphorylation	GO:0006468	BnaA06g15010D	chrA06	AT1G21245	Protein_kinase_superfamily_protein	5.80971	5.95242	4.6494	5.17519	4.4881	4.56334	4.8583	4.42074
protein amino acid phosphorylation	GO:0006468	BnaCnng01730D	chrCnn_random	AT4G00970	CRK41	4.61316	6.31446	3.7763	5.22009	5.01124	3.75765	6.3894	4.73604
protein amino acid phosphorylation	GO:0006468	BnaA07g25460D	chrA07	AT1G65800	ARK2_RK2	4.86724	4.3057	4.27758	5.74883	3.21919	5.82607	6.81621	4.44978
protein amino acid phosphorylation	GO:0006468	BnaA08g23630D	chrA08	AT1G16260	Wall_associated_kinase_family_protein	4.69959	3.71878	3.97751	3.6615	4.46218	5.55552	5.94473	6.07951
protein amino acid phosphorylation	GO:0006468	BnaAnng31290D	chrAnn_random	AT4G00970	CRK41	5.13408	6.03346	3.60422	4.73273	6.59162	4.72762	4.48969	2.64389
protein amino acid phosphorylation	GO:0006468	BnaA09g20410D	chrA09	AT4G04570	CRK40	4.58321	3.82494	4.7547	3.9316	5.65484	4.69336	5.8601	4.25794
protein amino acid phosphorylation	GO:0006468	BnaCnng25690D	chrCnn_random	AT4G04570	CRK40	3.92823	4.04572	4.57414	4.01812	5.1377	5.39989	5.39347	4.95409
protein amino acid phosphorylation	GO:0006468	BnaC07g38020D	chrC07	AT4G23230	CRK15	3.49002	6.22906	3.37229	4.42719	5.42191	5.55711	3.76729	4.81369
protein amino acid phosphorylation	GO:0006468	BnaAnng04540D	chrAnn_random	AT1G35710	Protein_kinase_family_protein_with_leucine_rich_repeat_domain	4.82839	5.31078	4.27088	4.58235	4.66538	4.1977	4.52619	4.54374
protein amino acid phosphorylation	GO:0006468	BnaC03g25600D	chrC03	AT2G45910	U_box_domain_containing_protein_kinase_family_protein	4.07762	5.06824	4.75808	4.51973	5.54482	4.31769	3.90683	4.7062
protein amino acid phosphorylation	GO:0006468	BnaC04g31230D	chrC04	AT5G39030	Protein_kinase_superfamily_protein	4.06403	4.68252	4.23834	3.82448	5.92928	4.81785	5.04829	4.16733
protein amino acid phosphorylation	GO:0006468	BnaA09g20420D	chrA09	AT4G04510	CRK38	5.89215	2.79395	8.07591	4.6893	6.06258	0	6.47138	2.23521
protein amino acid phosphorylation	GO:0006468	BnaCnng45080D	chrCnn_random	AT1G21230	WAK5	4.18061	4.61105	4.46522	4.42469	3.6629	4.28497	5.03618	4.7751
protein amino acid phosphorylation	GO:0006468	BnaC02g27790D	chrC02	AT4G00970	CRK41	4.07699	4.79626	4.57772	3.95298	3.98414	4.85019	4.6829	4.35082
protein amino acid phosphorylation	GO:0006468	BnaCnng19190D	chrCnn_random	AT4G02420	Concanavalin_A_like_lectin_protein_kinase_family_protein	4.0931	3.71489	4.46496	4.47888	4.23865	4.63041	4.06829	4.93915
protein amino acid phosphorylation	GO:0006468	BnaA06g15000D	chrA06	AT1G21270	WAK2	4.00268	5.39767	4.04182	4.57817	3.91008	4.17066	4.08323	4.358
protein amino acid phosphorylation	GO:0006468	BnaA10g12620D	chrA10	AT5G59680	Leucine_rich_repeat_protein_kinase_family_protein	4.5329	6.6261	1.81804	4.7352	3.39011	4.4645	3.59313	4.47502
protein amino acid phosphorylation	GO:0006468	BnaA03g21260D	chrA03	AT2G45910	U_box_domain_containing_protein_kinase_family_protein	4.08264	4.13545	4.33642	3.67424	4.58118	3.88755	4.59483	4.23256
protein amino acid phosphorylation	GO:0006468	BnaA03g09340D	chrA03	AT5G59670	Leucine_rich_repeat_protein_kinase_family_protein	4.5139	5.46263	3.9952	4.60845	3.82746	3.28931	3.57386	3.92987
protein amino acid phosphorylation	GO:0006468	BnaC03g62770D	chrC03	AT4G18640	MRH1	4.3978	4.00275	3.38414	3.93279	3.97183	4.10143	4.43088	4.22054
protein amino acid phosphorylation	GO:0006468	BnaC01g14860D	chrC01	AT4G23300	CRK22	4.23549	3.51664	2.81535	4.35132	3.41023	3.89687	5.60174	3.43962
protein amino acid phosphorylation	GO:0006468	BnaA03g09330D	chrA03	AT5G59680	Leucine_rich_repeat_protein_kinase_family_protein	3.4135	5.50155	3.44738	4.35502	3.71991	3.09931	3.63623	3.25308
protein amino acid phosphorylation	GO:0006468	BnaC01g14630D	chrC01	AT4G23220	CRK14	3.33257	2.75177	3.51457	2.99542	5.7761	5.0632	3.44584	3.46538
protein amino acid phosphorylation	GO:0006468	BnaC03g11750D	chrC03	AT5G59670	Leucine_rich_repeat_protein_kinase_family_protein	4.59493	4.55168	3.22762	4.25345	3.41529	3.34665	3.13937	3.78356
protein amino acid phosphorylation	GO:0006468	BnaC05g38740D	chrC05	AT3G14840	Leucine_rich_repeat_transmembrane_protein_kinase	3.93748	3.40168	4.20672	4.22121	4.55398	2.66666	3.98132	3.2574
protein amino acid phosphorylation	GO:0006468	BnaA07g07760D	chrA07	AT1G29720	Leucine_rich_repeat_transmembrane_protein_kinase	0	3.25863	2.60402	4.23144	6.30408	3.73569	4.92872	4.99997
protein amino acid phosphorylation	GO:0006468	BnaC09g34960D	chrC09	AT5G59680	Leucine_rich_repeat_protein_kinase_family_protein	4.8382	5.70545	3.04504	2.96358	4.05178	2.53206	3.02943	3.66667
protein amino acid phosphorylation	GO:0006468	BnaC08g14850D	chrC08	AT1G11350	CBRLK1_SD1_13_RKS2	3.25974	3.37496	3.51722	3.58754	4.2575	3.49054	4.68557	3.27056
protein amino acid phosphorylation	GO:0006468	BnaA01g08380D	chrA01	AT4G28490	RLK5_HAE	4.09391	3.37694	3.89896	3.22094	4.54844	2.52366	4.16306	3.60724
protein amino acid phosphorylation	GO:0006468	BnaA05g15170D	chrA05	AT1G51890	Leucine_rich_repeat_protein_kinase_family_protein	3.20103	4.51582	3.26905	3.76407	4.61248	2.27377	3.95575	3.01529
protein amino acid phosphorylation	GO:0006468	BnaC07g09570D	chrC07	AT1G29750	RKF1	3.37938	3.35145	3.39295	3.19802	4.13583	3.41385	4.24974	3.43791
protein amino acid phosphorylation	GO:0006468	BnaC03g11690D	chrC03	AT5G59680	Leucine_rich_repeat_protein_kinase_family_protein	3.7278	4.96994	3.23697	3.64078	3.93645	2.74304	3.21672	3.00982
protein amino acid phosphorylation	GO:0006468	BnaC01g09930D	chrC01	AT4G28490	RLK5_HAE	4.58419	2.9598	5.07986	3.93736	4.38391	1.94866	3.49612	1.95671
protein amino acid phosphorylation	GO:0006468	BnaA03g43720D	chrA03	AT4G18250	receptor_serine_threonine_kinase_putative	1.97883	1.8833	3.22745	1.93737	5.90477	3.83318	5.53318	4.03752
protein amino acid phosphorylation	GO:0006468	BnaA07g07730D	chrA07	AT1G29750	RKF1	2.87254	3.23596	3.09374	3.02631	3.73816	3.45481	4.12313	3.72934
protein amino acid phosphorylation	GO:0006468	BnaA07g07710D	chrA07	AT1G29750	RKF1	2.40662	0	3.36238	2.37548	5.31661	2.81878	5.7881	5.06374
protein amino acid phosphorylation	GO:0006468	BnaC08g28750D	chrC08	AT3G57770	Protein_kinase_superfamily_protein	3.54732	3.55025	3.32757	2.91574	3.54948	3.06333	3.44223	3.43198
protein amino acid phosphorylation	GO:0006468	BnaC02g30150D	chrC02	AT1G56130	Leucine_rich_repeat_transmembrane_protein_kinase	3.47764	2.75989	3.40739	3.62885	2.55953	2.21488	3.69364	4.15753
protein amino acid phosphorylation	GO:0006468	BnaCnng78660D	chrCnn_random	AT1G29720	Leucine_rich_repeat_transmembrane_protein_kinase	3.80662	0	2.44806	2.46974	6.52905	0	5.0745	4.93027
protein amino acid phosphorylation	GO:0006468	BnaC05g22720D	chrC05	AT1G29750	RKF1	2.81393	1.64948	2.38575	2.62379	4.30066	2.80164	4.61494	3.94016
protein amino acid phosphorylation	GO:0006468	BnaA06g07010D	chrA06	AT1G11330	S_locus_lectin_protein_kinase_family_protein	2.87161	3.62579	2.53367	2.98546	3.44872	3.93316	2.3583	2.57888
protein amino acid phosphorylation	GO:0006468	BnaC05g16530D	chrC05	AT1G21245	Protein_kinase_superfamily_protein	3.62693	4.34657	3.56409	0	3.10527	0	4.94014	4.72992
protein amino acid phosphorylation	GO:0006468	BnaA01g12650D	chrA01	AT4G23300	CRK22	2.68103	2.40159	3.0275	2.92116	3.77021	2.34067	3.62752	3.32662
protein amino acid phosphorylation	GO:0006468	BnaA01g22610D	chrA01	AT1G61480	S_locus_lectin_protein_kinase_family_protein	2.61658	2.43234	3.38776	0	5.02909	2.84613	4.10384	3.67554
protein amino acid phosphorylation	GO:0006468	BnaA03g44580D	chrA03	AT4G20790	Leucine_rich_repeat_protein_kinase_family_protein	2.82771	2.26899	1.94411	1.59442	4.08308	2.02745	5.19609	4.1471
protein amino acid phosphorylation	GO:0006468	BnaCnng01750D	chrCnn_random	AT4G00970	CRK41	0	4.30437	0	2.81109	4.08849	2.79632	6.20134	3.82013
protein amino acid phosphorylation	GO:0006468	BnaA02g12730D	chrA02	AT1G66980	SNC4	3.28003	3.31344	2.69175	3.08927	3.02506	2.76345	2.8012	3.02401
protein amino acid phosphorylation	GO:0006468	BnaCnng40590D	chrCnn_random	AT3G57730	Protein_kinase_superfamily_protein	2.75782	2.80029	2.83225	3.28	3.13962	2.52623	2.55741	3.06656
protein amino acid phosphorylation	GO:0006468	BnaA09g20300D	chrA09	AT4G04740	member_of_Calcium_Dependent_Protein_Kinase	2.32705	3.07939	2.38947	3.39202	2.69519	3.43093	2.74706	2.81192
protein amino acid phosphorylation	GO:0006468	BnaC07g09550D	chrC07	AT1G29750	RKF1	1.53952	0	3.37257	1.90297	3.15556	3.24501	4.61302	4.93482
protein amino acid phosphorylation	GO:0006468	BnaC05g08650D	chrC05	AT1G11330	S_locus_lectin_protein_kinase_family_protein	3.13547	3.06055	2.82342	2.61472	3.15374	3.01734	2.38251	2.05828
protein amino acid phosphorylation	GO:0006468	BnaA03g25460D	chrA03	AT4G04540	CRK39	3.42466	2.06757	2.3282	1.60615	3.48814	3.13172	3.232	2.71879
protein amino acid phosphorylation	GO:0006468	BnaC01g29490D	chrC01	AT1G61480	S_locus_lectin_protein_kinase_family_protein	2.72141	1.29851	2.8065	1.70971	4.04809	2.30351	3.77627	2.90241
protein amino acid phosphorylation	GO:0006468	BnaA01g12940D	chrA01	AT4G23220	CRK14	3.51747	0	2.73832	2.53223	4.10737	2.85382	2.85632	2.95713
protein amino acid phosphorylation	GO:0006468	BnaC02g16940D	chrC02	AT1G66920	Protein_kinase_superfamily_protein	3.13778	2.0588	2.9844	2.42331	1.89294	2.87836	3.3225	2.78471
protein amino acid phosphorylation	GO:0006468	BnaC06g09130D	chrC06	AT1G51890	Leucine_rich_repeat_protein_kinase_family_protein	2.46395	2.32097	2.30217	2.16482	3.18427	2.8526	3.07307	3.09943
protein amino acid phosphorylation	GO:0006468	BnaC07g09660D	chrC07	AT1G29720	Leucine_rich_repeat_transmembrane_protein_kinase	3.36566	0	4.10318	0	6.57758	0	4.99063	2.38832
protein amino acid phosphorylation	GO:0006468	BnaCnng39490D	chrCnn_random	AT2G31880	SOBIR1_EVR	1.98568	3.00106	2.105	2.92072	2.17315	3.02914	2.7278	3.25925
protein amino acid phosphorylation	GO:0006468	BnaC07g38100D	chrC07	AT4G23290	CRK21	0	0	2.46334	0	5.30422	2.74952	5.30107	5.05303
protein amino acid phosphorylation	GO:0006468	BnaA05g15180D	chrA05	AT1G51890	Leucine_rich_repeat_protein_kinase_family_protein	2.22131	2.43475	2.27897	2.3044	2.78662	2.62037	2.73439	2.88158
protein amino acid phosphorylation	GO:0006468	BnaA07g30280D	chrA07	AT1G72540	Protein_kinase_superfamily_protein	2.27106	1.54063	2.56743	1.98856	2.68626	2.48161	3.40044	2.51758
protein amino acid phosphorylation	GO:0006468	BnaC06g33730D	chrC06	AT1G72540	Protein_kinase_superfamily_protein	2.56269	2.01358	2.55772	2.06755	1.6322	2.75167	2.84863	2.53601
protein amino acid phosphorylation	GO:0006468	BnaC02g17040D	chrC02	AT5G59670	Leucine_rich_repeat_protein_kinase_family_protein	2.29649	1.99782	2.2847	2.1506	2.71053	2.59131	2.25377	2.48308
protein amino acid phosphorylation	GO:0006468	BnaA01g12910D	chrA01	AT4G23230	CRK15	2.51568	2.68074	2.1383	2.51348	2.23104	1.83153	2.67169	2.1758
protein amino acid phosphorylation	GO:0006468	BnaA08g25330D	chrA08	AT1G11350	CBRLK1_SD1_13_RKS2	1.93695	1.65003	2.1573	2.05636	2.94116	2.09972	3.0105	2.83621
protein amino acid phosphorylation	GO:0006468	BnaA08g08670D	chrA08	AT4G18250	receptor_serine_threonine_kinase_putative	5.82766	0	3.32957	0	4.82913	0	4.59264	0
protein amino acid phosphorylation	GO:0006468	BnaC03g11660D	chrC03	AT5G59700	Protein_kinase_superfamily_protein	2.06853	1.89677	2.09942	1.73706	2.97815	2.608	2.63824	2.54757
protein amino acid phosphorylation	GO:0006468	BnaCnng09920D	chrCnn_random	AT1G61500	S_locus_lectin_protein_kinase_family_protein	2.44858	0	1.78435	3.23904	3.13763	2.54098	1.73395	2.94977
protein amino acid phosphorylation	GO:0006468	BnaA03g23020D	chrA03	AT2G23200	Protein_kinase_superfamily_protein	2.6953	1.85448	2.05501	2.03355	2.65167	2.26788	2.71992	1.35656
protein amino acid phosphorylation	GO:0006468	BnaA09g47640D	chrA09	AT1G11410	S_locus_lectin_protein_kinase_family_protein	1.8521	2.07401	2.14687	2.15359	2.56705	2.67594	2.15482	1.95265
protein amino acid phosphorylation	GO:0006468	BnaA01g12960D	chrA01	AT4G23250	EMB1290_DUF26_21_RKC1_CRK17	0	0	0	0	5.08309	3.5268	4.7402	4.16159
protein amino acid phosphorylation	GO:0006468	BnaA08g25350D	chrA08	AT1G11300	protein_serine_threonine_kinases	2.14369	2.04882	3.67555	3.95132	0	1.60743	1.70089	1.82668
protein amino acid phosphorylation	GO:0006468	BnaA05g24730D	chrA05	AT3G14840	Leucine_rich_repeat_transmembrane_protein_kinase	1.09168	0	4.50032	2.86101	1.14665	0	4.66479	2.0229
protein amino acid phosphorylation	GO:0006468	BnaC03g27170D	chrC03	AT2G23200	Protein_kinase_superfamily_protein	1.77558	1.54954	2.02297	1.4833	2.75795	1.83183	2.48996	2.31435
protein amino acid phosphorylation	GO:0006468	BnaC03g72920D	chrC03_random	AT4G11890	Protein_kinase_superfamily_protein	1.71395	0	1.86288	1.60183	3.1375	2.02818	2.99288	2.78515
protein amino acid phosphorylation	GO:0006468	BnaC02g44390D	chrC02_random	AT5G59700	Protein_kinase_superfamily_protein	1.45243	2.61638	1.82138	1.86983	2.37434	1.96655	1.73041	2.22565
protein amino acid phosphorylation	GO:0006468	BnaC08g42100D	chrC08	AT1G11410	S_locus_lectin_protein_kinase_family_protein	2.06783	2.04858	1.77248	1.96288	2.64424	1.5506	2.19718	1.74474
protein amino acid phosphorylation	GO:0006468	BnaC01g14690D	chrC01	AT4G23250	EMB1290_DUF26_21_RKC1_CRK17	3.27537	0	0	0	3.87938	2.26347	3.54015	2.14064
protein amino acid phosphorylation	GO:0006468	BnaC09g22660D	chrC09	AT4G04740	member_of_Calcium_Dependent_Protein_Kinase	1.84253	1.91402	1.75537	1.84176	2.13436	1.88543	1.79969	1.89369
protein amino acid phosphorylation	GO:0006468	BnaC04g31220D	chrC04	AT5G39000	Malectin_receptor_like_protein_kinase_family_protein	1.06667	1.25784	1.23991	1.34869	2.29124	2.18626	2.66432	2.91612
protein amino acid phosphorylation	GO:0006468	BnaC01g14610D	chrC01	AT4G23230	CRK15	2.44375	1.77755	2.13396	1.421	2.19524	1.62095	1.79359	1.36387
protein amino acid phosphorylation	GO:0006468	BnaC09g23960D	chrC09	AT4G11530	CRK34	1.29334	2.38364	1.4599	2.76406	1.62755	2.10703	1.44464	1.44976
protein amino acid phosphorylation	GO:0006468	BnaC09g51730D	chrC09_random	AT3G47570	Leucine_rich_repeat_protein_kinase_family_protein	1.96667	1.09398	1.59426	1.51758	1.84124	2.09016	2.15021	2.12521
protein amino acid phosphorylation	GO:0006468	BnaC07g35180D	chrC07	AT4G18250	receptor_serine_threonine_kinase_putative	1.98912	0	0	0	3.96944	2.40854	3.00435	2.90895
protein amino acid phosphorylation	GO:0006468	BnaC07g35170D	chrC07	AT4G18250	receptor_serine_threonine_kinase_putative	1.86338	0	0	0	4.07094	2.6806	3.0722	2.45668
protein amino acid phosphorylation	GO:0006468	BnaC03g29930D	chrC03	AT4G04500	CRK37	0	5.70254	0	2.33748	0	3.7124	0	1.93477
protein amino acid phosphorylation	GO:0006468	BnaC08g14760D	chrC08	AT1G11300	protein_serine_threonine_kinases	2.10136	1.22939	3.01223	1.07436	1.46643	1.16016	2.12072	1.1436
protein amino acid phosphorylation	GO:0006468	BnaC07g38110D	chrC07	AT4G23300	CRK22	0	0	0	0	4.80848	2.2139	4.34123	1.86211
protein amino acid phosphorylation	GO:0006468	BnaA02g07840D	chrA02	AT5G58140	PHOT2_NPL1	1.62175	1.70328	1.23149	1.49225	1.59458	1.6429	2.19335	1.53025
protein amino acid phosphorylation	GO:0006468	BnaA03g25520D	chrA03	AT4G04500	CRK37	0	4.01685	0	2.54646	0	4.03556	0	2.34613
protein amino acid phosphorylation	GO:0006468	BnaA02g06940D	chrA02	AT5G59700	Protein_kinase_superfamily_protein	1.53673	1.19256	1.28717	1.53658	1.94096	1.72374	1.90621	1.77842
protein amino acid phosphorylation	GO:0006468	BnaC03g59300D	chrC03	AT1G29740	Leucine_rich_repeat_transmembrane_protein_kinase	0	1.99798	1.2984	1.82488	1.2306	2.00949	1.77587	2.6097
protein amino acid phosphorylation	GO:0006468	BnaC04g30730D	chrC04	AT5G38250	Protein_kinase_family_protein	1.51629	0	1.24736	1.54297	2.64249	1.42246	2.59803	1.47719
protein amino acid phosphorylation	GO:0006468	BnaC06g17510D	chrC06	AT3G59750	Concanavalin_A_like_lectin_protein_kinase_family_protein	0	0	0	0	3.25069	3.00607	3.39185	2.66249
protein amino acid phosphorylation	GO:0006468	BnaCnng09910D	chrCnn_random	AT1G61390	S_locus_lectin_protein_kinase_family_protein	0	0	0	0	3.94491	0	4.08782	4.26651
protein amino acid phosphorylation	GO:0006468	BnaAnng31840D	chrAnn_random	AT5G03320	Protein_kinase_superfamily_protein	1.5181	1.3012	1.40003	0.791864	1.80993	1.72315	1.49629	1.64955
protein amino acid phosphorylation	GO:0006468	BnaA03g25510D	chrA03	AT4G04510	CRK38	1.1271	1.39727	0	1.75627	1.25684	3.10084	0.794799	2.0622
protein amino acid phosphorylation	GO:0006468	BnaA08g10610D	chrA08	AT4G23320	CRK24	0	0	1.71775	0	1.63642	5.11532	2.81619	0
protein amino acid phosphorylation	GO:0006468	BnaA06g07000D	chrA06	AT1G11280	S_locus_lectin_protein_kinase_family_protein	1.65448	1.9262	1.46711	1.21306	2.10611	1.84632	0.891808	0
protein amino acid phosphorylation	GO:0006468	BnaCnng26520D	chrCnn_random	AT4G17660	Protein_kinase_superfamily_protein	1.73125	0	2.18976	1.74805	1.51419	1.83679	1.99033	0
protein amino acid phosphorylation	GO:0006468	BnaCnng39500D	chrCnn_random	AT2G31880	SOBIR1_EVR	1.08813	1.09504	1.53035	1.4313	1.29399	1.41939	1.38337	1.42222
protein amino acid phosphorylation	GO:0006468	BnaA03g25500D	chrA03	AT4G04570	CRK40	1.77104	0.855398	1.6833	1.20579	1.86189	0.839674	1.49585	0.901185
protein amino acid phosphorylation	GO:0006468	BnaA09g42080D	chrA09	AT2G23200	Protein_kinase_superfamily_protein	1.54221	1.21447	1.37015	1.14522	1.37599	1.86779	0.965283	0.992579
protein amino acid phosphorylation	GO:0006468	BnaC08g34510D	chrC08	AT2G23200	Protein_kinase_superfamily_protein	1.6869	1.09043	1.43357	0.782486	1.74921	1.55522	1.31525	0.732415
protein amino acid phosphorylation	GO:0006468	BnaA09g21690D	chrA09	AT4G11530	CRK34	1.41619	0.921638	2.40959	1.5746	0.714347	1.08781	0.864669	1.28979
protein amino acid phosphorylation	GO:0006468	BnaC01g39300D	chrC01	AT3G08870	Concanavalin_A_like_lectin_protein_kinase_family_protein	1.21307	0	0	0	2.24407	1.79754	2.24068	2.67463
protein amino acid phosphorylation	GO:0006468	BnaC06g36670D	chrC06	AT1G76040	CPK29	1.09623	1.07228	0.952813	1.33914	1.04016	1.43927	1.43305	1.61098
protein amino acid phosphorylation	GO:0006468	BnaC03g30950D	chrC03	AT4G02420	Concanavalin_A_like_lectin_protein_kinase_family_protein	1.08085	0	1.4271	1.45209	1.28276	1.42629	1.1828	1.91393
protein amino acid phosphorylation	GO:0006468	BnaA09g47630D	chrA09	AT1G11340	S_locus_lectin_protein_kinase_family_protein	1.19023	0	1.189	1.66657	3.441	0	2.14696	0
protein amino acid phosphorylation	GO:0006468	BnaA08g17790D	chrA08	AT1G29740	Leucine_rich_repeat_transmembrane_protein_kinase	1.13116	0.91678	0.812547	0	2.35027	1.93488	1.50536	0.967241
protein amino acid phosphorylation	GO:0006468	BnaC02g10920D	chrC02	AT5G58140	PHOT2_NPL1	1.36539	1.08312	1.08702	0	1.98779	1.35006	1.48045	1.06996
protein amino acid phosphorylation	GO:0006468	BnaA09g00780D	chrA09	AT4G02420	Concanavalin_A_like_lectin_protein_kinase_family_protein	1.90737	0	1.93281	0	2.80374	0	2.60935	0
protein amino acid phosphorylation	GO:0006468	BnaC05g31890D	chrC05	AT3G20200	Protein_kinase_protein_with_adenine_nucleotide_alpha_hydrolases_like_domain	1.18639	1.11809	0.72602	0.837382	1.61626	1.98503	0.888023	0.866161
protein amino acid phosphorylation	GO:0006468	BnaA09g36980D	chrA09	AT3G57770	Protein_kinase_superfamily_protein	1.10102	1.61051	1.02995	1.19117	0	0.937843	1.4846	1.67092
protein amino acid phosphorylation	GO:0006468	BnaA02g14960D	chrA02	AT1G70530	CRK3	1.17583	0.711502	1.45052	1.20063	1.13313	1.3739	0.789283	1.15829
protein amino acid phosphorylation	GO:0006468	BnaC08g42110D	chrC08	AT1G11350	CBRLK1_SD1_13_RKS2	2.05489	1.40759	1.02526	1.20468	1.26937	1.982	0	0
protein amino acid phosphorylation	GO:0006468	BnaC01g43340D	chrC01_random	AT1G61610	S_locus_lectin_protein_kinase_family_protein	1.38469	0	0	0	3.03646	1.95518	2.53342	0
protein amino acid phosphorylation	GO:0006468	BnaA07g14270D	chrA07	AT2G29000	Leucine_rich_repeat_protein_kinase_family_protein	0	0	0	0	6.40737	0	2.31006	0
protein amino acid phosphorylation	GO:0006468	BnaC05g08740D	chrC05	AT1G11410	S_locus_lectin_protein_kinase_family_protein	2.15503	2.51139	1.94452	2.05449	0	0	0	0
protein amino acid phosphorylation	GO:0006468	BnaA06g02230D	chrA06	AT1G51620	Protein_kinase_superfamily_protein	0	0	0	0	2.16752	1.38396	2.56393	2.45952
protein amino acid phosphorylation	GO:0006468	BnaCnng60400D	chrCnn_random	AT5G61560	U_box_domain_containing_protein_kinase_family_protein	0	0	0	1.32731	1.55522	1.82057	2.15707	1.68444
protein amino acid phosphorylation	GO:0006468	BnaC03g71050D	chrC03	AT1G56145	Leucine_rich_repeat_transmembrane_protein_kinase	1.33633	1.08146	0.946205	0.79495	1.76191	1.07107	0.617072	0.910746
protein amino acid phosphorylation	GO:0006468	BnaA08g17100D	chrA08	AT4G38470	ACT_like_protein_tyrosine_kinase_family_protein	1.26766	0	0	0	2.51604	2.8069	1.87749	0
protein amino acid phosphorylation	GO:0006468	BnaA04g08970D	chrA04	AT5G39000	Malectin_receptor_like_protein_kinase_family_protein	0.712589	0.844518	0.920087	0.79878	1.15002	0.975249	1.38396	1.54717
protein amino acid phosphorylation	GO:0006468	BnaA07g26080D	chrA07	AT1G66830	Leucine_rich_repeat_protein_kinase_family_protein	1.86403	0	0	1.67453	2.13921	2.48278	0	0
protein amino acid phosphorylation	GO:0006468	BnaA03g03330D	chrA03	AT5G11410	Protein_kinase_superfamily_protein	2.48409	0	0	0	3.24677	0	2.42148	0
protein amino acid phosphorylation	GO:0006468	BnaC01g29480D	chrC01	AT1G61380	SD1_29	1.02525	0	1.0063	0.88411	1.52656	1.45041	1.00933	1.17738
protein amino acid phosphorylation	GO:0006468	BnaA09g21700D	chrA09	AT4G11480	CRK32	0.827444	0	0	0	2.14958	1.88204	1.49434	1.53201
protein amino acid phosphorylation	GO:0006468	BnaA07g26160D	chrA07	AT1G67000	Protein_kinase_superfamily_protein	0	0	1.78094	0	1.82379	0	2.74398	1.42177
protein amino acid phosphorylation	GO:0006468	BnaA06g17300D	chrA06	AT3G47580	Leucine_rich_repeat_protein_kinase_family_protein	1.30587	0	0	1.44306	2.53323	0	1.45617	1.02536
protein amino acid phosphorylation	GO:0006468	BnaC04g22850D	chrC04	AT3G59750	Concanavalin_A_like_lectin_protein_kinase_family_protein	1.69749	0	2.38448	0	1.34184	0	2.33873	0
protein amino acid phosphorylation	GO:0006468	BnaC08g28740D	chrC08	AT3G57770	Protein_kinase_superfamily_protein	1.60559	0	0	0	2.06075	1.91964	0.938995	1.12394
protein amino acid phosphorylation	GO:0006468	BnaA02g06930D	chrA02	AT5G59680	Leucine_rich_repeat_protein_kinase_family_protein	0	0	0.886264	1.03238	0.825807	1.1905	1.87836	1.82786
protein amino acid phosphorylation	GO:0006468	BnaC06g27840D	chrC06	AT1G66880	Protein_kinase_superfamily_protein	1.24275	0	1.10331	0	1.45782	1.25536	1.27027	1.22719
protein amino acid phosphorylation	GO:0006468	BnaCnng53810D	chrCnn_random	AT4G32300	SD2_5	1.36978	0	1.14232	0	1.51495	1.48785	1.18432	0.834877
protein amino acid phosphorylation	GO:0006468	BnaCnng22800D	chrCnn_random	AT3G47090	Leucine_rich_repeat_protein_kinase_family_protein	1.31947	0.727921	0.926409	0	1.54111	1.38006	0.810137	0.812324
protein amino acid phosphorylation	GO:0006468	BnaC09g09240D	chrC09	AT2G17220	Protein_kinase_superfamily_protein	1.03339	0.695905	0.777913	0.747387	1.14531	1.34997	0.876253	0.851
protein amino acid phosphorylation	GO:0006468	BnaA01g22750D	chrA01	AT1G61610	S_locus_lectin_protein_kinase_family_protein	1.42266	0	0	0	1.29174	1.69508	1.63866	1.35956
protein amino acid phosphorylation	GO:0006468	BnaA07g35110D	chrA07	AT1G79680	WAKL10_ATWAKL10	1.0425	1.27451	1.37044	0	0.969376	1.48343	1.23645	0
protein amino acid phosphorylation	GO:0006468	BnaA08g05360D	chrA08	AT1G70530	CRK3	1.53872	0	1.01662	0	1.50894	1.26536	1.20327	0.74886
protein amino acid phosphorylation	GO:0006468	BnaC03g59390D	chrC03	AT1G29740	Leucine_rich_repeat_transmembrane_protein_kinase	0.8691	0	0.845607	0	1.84344	1.42697	1.27894	0.999078
protein amino acid phosphorylation	GO:0006468	BnaA04g02240D	chrA04	AT3G57640	Protein_kinase_superfamily_protein	0	0	1.25132	0	0	2.91736	0	3.06709
protein amino acid phosphorylation	GO:0006468	BnaC02g40560D	chrC02	AT5G25440	Protein_kinase_superfamily_protein	0	0	0	0	2.29575	2.36737	1.32238	1.22437
protein amino acid phosphorylation	GO:0006468	BnaC07g45520D	chrC07	AT4G35310	CPK5_ATCPK5	0	1.74854	0	0	0.999108	0	1.40567	3.04339
protein amino acid phosphorylation	GO:0006468	BnaC09g01600D	chrC09	AT3G28040	Leucine_rich_receptor_like_protein_kinase_family_protein	0	0	0	0	2.57477	0.696289	2.32864	1.51437
protein amino acid phosphorylation	GO:0006468	BnaC06g27800D	chrC06	AT1G66830	Leucine_rich_repeat_protein_kinase_family_protein	1.89176	0	0	0	2.58897	2.60093	0	0
protein amino acid phosphorylation	GO:0006468	BnaA08g30660D	chrA08_random	AT4G32300	SD2_5	1.18323	0	0.942428	0	1.39516	1.38881	1.12113	0.951743
protein amino acid phosphorylation	GO:0006468	BnaA06g15320D	chrA06	AT1G21590	Protein_kinase_protein_with_adenine_nucleotide_alpha_hydrolases_like_domain	0	0	0	0	2.10836	1.42047	2.34879	1.07317
protein amino acid phosphorylation	GO:0006468	BnaCnng49990D	chrCnn_random	AT5G58540	Protein_kinase_superfamily_protein	0.689651	0.74694	1.01027	0.879647	0.958081	0.644586	1.17538	0.781036
protein amino acid phosphorylation	GO:0006468	BnaC03g04760D	chrC03	AT5G11410	Protein_kinase_superfamily_protein	0	0	0	0	3.47553	1.62206	1.7798	0
protein amino acid phosphorylation	GO:0006468	BnaA01g22660D	chrA01	AT1G61610	S_locus_lectin_protein_kinase_family_protein	0	0	0	0	1.87696	1.37569	1.7391	1.83559
protein amino acid phosphorylation	GO:0006468	BnaCnng64820D	chrCnn_random	AT1G34420	leucine_rich_repeat_transmembrane_protein_kinase_family_protein	0.99406	0.87622	0.965315	0.722735	0.717422	0.952323	0.701976	0.880465
protein amino acid phosphorylation	GO:0006468	BnaAnng06950D	chrAnn_random	AT5G61560	U_box_domain_containing_protein_kinase_family_protein	0	0	0	0	2.15611	1.35793	1.96239	1.30677
protein amino acid phosphorylation	GO:0006468	BnaA09g56230D	chrA09_random	AT1G16670	Protein_kinase_superfamily_protein	0	0	0	0	1.63975	3.12839	1.94222	0
protein amino acid phosphorylation	GO:0006468	BnaA06g11580D	chrA06	AT1G17230	Leucine_rich_receptor_like_protein_kinase_family_protein	1.44976	0	0	0	2.43531	1.57304	1.23591	0
protein amino acid phosphorylation	GO:0006468	BnaC01g36570D	chrC01	AT3G14840	Leucine_rich_repeat_transmembrane_protein_kinase	1.35485	0.577671	1.09394	0	1.50801	1.01534	1.13087	0
protein amino acid phosphorylation	GO:0006468	BnaA03g37660D	chrA03	AT3G25070	RIN4	0.774848	0.747124	0.898248	0.515119	0.951302	0.796593	1.33181	0.646394
protein amino acid phosphorylation	GO:0006468	BnaC03g59990D	chrC03	AT4G38470	ACT_like_protein_tyrosine_kinase_family_protein	0.935855	0	0	0	1.90035	1.84529	1.96649	0
protein amino acid phosphorylation	GO:0006468	BnaAnng23860D	chrAnn_random	AT5G65500	U_box_domain_containing_protein_kinase_family_protein	1.25223	0	0	0	1.39392	1.16712	1.29257	1.48406
protein amino acid phosphorylation	GO:0006468	BnaC07g31290D	chrC07	AT5G61560	U_box_domain_containing_protein_kinase_family_protein	1.06123	0	0.972273	0.78518	1.29015	0.556932	1.17696	0.742796
protein amino acid phosphorylation	GO:0006468	BnaA03g24780D	chrA03	AT4G11530	CRK34	1.00044	0	0.933879	0	2.26699	1.20826	1.10392	0
protein amino acid phosphorylation	GO:0006468	BnaC01g14390D	chrC01	AT4G23300	CRK22	1.02335	0	1.6368	0.839681	0.909767	0	0.939286	1.0868
protein amino acid phosphorylation	GO:0006468	BnaA07g14620D	chrA07	AT5G39030	Protein_kinase_superfamily_protein	0.941484	0.884677	1.04908	0.698643	0.784455	0.837468	0.625143	0.577308
protein amino acid phosphorylation	GO:0006468	BnaA03g23230D	chrA03	AT2G23450	Protein_kinase_superfamily_protein	0.76795	1.39519	0	1.24269	0	1.00032	0.754934	1.19963
protein amino acid phosphorylation	GO:0006468	BnaA07g07690D	chrA07	AT1G29740	Leucine_rich_repeat_transmembrane_protein_kinase	0.917321	0	1.246	0	1.68054	0	1.61385	0.87295
protein amino acid phosphorylation	GO:0006468	BnaA03g24810D	chrA03	AT4G11900	S_locus_lectin_protein_kinase_family_protein	1.28013	0	0	0	2.1444	1.42611	0	1.45126
protein amino acid phosphorylation	GO:0006468	BnaAnng25230D	chrAnn_random	AT5G12000	Protein_kinase_protein_with_adenine_nucleotide_alpha_hydrolases_like_domain	0	0	0	0	1.93376	1.96681	2.38401	0
protein amino acid phosphorylation	GO:0006468	BnaA04g01660D	chrA04	AT3G59350	Protein_kinase_superfamily_protein	1.33396	0	0	0	1.68277	2.07793	0	1.12439
protein amino acid phosphorylation	GO:0006468	BnaC06g28140D	chrC06	AT1G67000	Protein_kinase_superfamily_protein	0	0	0	0	1.23685	0.931584	2.46492	1.50554
protein amino acid phosphorylation	GO:0006468	BnaA07g17170D	chrA07	AT3G57120	Protein_kinase_superfamily_protein	0.842916	0	0.793922	0	0.905602	1.38711	1.03658	0.933543
protein amino acid phosphorylation	GO:0006468	BnaA10g11810D	chrA10	AT5G58540	Protein_kinase_superfamily_protein	0.681105	0	1.02793	0.711998	0.63296	0.536335	1.29514	0.964081
protein amino acid phosphorylation	GO:0006468	BnaC07g28970D	chrC07	AT5G25930	Protein_kinase_family_protein_with_leucine_rich_repeat_domain	0.814627	0	1.18521	0	1.2556	0.966362	0.807827	0.793725
protein amino acid phosphorylation	GO:0006468	BnaA08g06400D	chrA08	AT1G34420	leucine_rich_repeat_transmembrane_protein_kinase_family_protein	0.850072	0.637599	1.03588	0.695156	0.563873	0.951201	0	1.07499
protein amino acid phosphorylation	GO:0006468	BnaC01g29510D	chrC01	AT1G61610	S_locus_lectin_protein_kinase_family_protein	0	0	0	0	1.25025	0	2.29567	2.20148
protein amino acid phosphorylation	GO:0006468	BnaA07g03070D	chrA07	AT2G17220	Protein_kinase_superfamily_protein	0.947411	0	1.06133	0.575479	0.897289	0.897767	0.62699	0.730428
protein amino acid phosphorylation	GO:0006468	BnaC04g23100D	chrC04	AT3G59350	Protein_kinase_superfamily_protein	1.52562	0	0	0	1.98387	2.20275	0	0
protein amino acid phosphorylation	GO:0006468	BnaC09g23650D	chrC09	AT4G11890	Protein_kinase_superfamily_protein	1.29226	0	0.930143	0	0.866796	1.32003	1.27385	0
protein amino acid phosphorylation	GO:0006468	BnaA09g08980D	chrA09	AT2G17220	Protein_kinase_superfamily_protein	1.11999	0	0.811072	0	1.08902	1.16153	0.566941	0.878495
protein amino acid phosphorylation	GO:0006468	BnaA09g28500D	chrA09	AT1G25390	Protein_kinase_superfamily_protein	1.45251	0	0	0	1.77251	2.38384	0	0
protein amino acid phosphorylation	GO:0006468	BnaA07g23160D	chrA07	AT1G72180	Leucine_rich_receptor_like_protein_kinase_family_protein	1.04829	0	0.937812	0	1.89546	0	1.14139	0.585703
protein amino acid phosphorylation	GO:0006468	BnaA01g11790D	chrA01	AT4G21940	CPK15	0.802678	0	1.19241	0.719362	0.878203	0	1.03594	0.905943
protein amino acid phosphorylation	GO:0006468	BnaA06g27970D	chrA06	AT5G25930	Protein_kinase_family_protein_with_leucine_rich_repeat_domain	1.00544	0	0.994324	0	1.00461	0.905092	0.625731	0.982171
protein amino acid phosphorylation	GO:0006468	BnaA09g13770D	chrA09	AT1G61390	S_locus_lectin_protein_kinase_family_protein	0.817241	0	0.871105	0	1.24663	1.02324	0.628774	0.905571
protein amino acid phosphorylation	GO:0006468	BnaA10g14410D	chrA10	AT5G21222	protein_kinase_family_protein	0	0	0	0	1.44999	1.24531	1.51542	1.25029
protein amino acid phosphorylation	GO:0006468	BnaC07g25090D	chrC07	AT3G28450	Leucine_rich_repeat_protein_kinase_family_protein	0.86439	0	0	0	1.70058	0.798695	0.843917	1.15933
protein amino acid phosphorylation	GO:0006468	BnaC07g28960D	chrC07	AT5G25930	Protein_kinase_family_protein_with_leucine_rich_repeat_domain	0.754208	0	0.868586	0	1.18075	0.895813	0.726259	0.940359
protein amino acid phosphorylation	GO:0006468	BnaA04g16790D	chrA04	AT2G29000	Leucine_rich_repeat_protein_kinase_family_protein	0	0	0	0	2.30443	1.92182	0	1.12294
protein amino acid phosphorylation	GO:0006468	BnaCnng49020D	chrCnn_random	AT4G04570	CRK40	1.03512	0.661274	0.882626	0	1.21038	0.876951	0.681815	0
protein amino acid phosphorylation	GO:0006468	BnaC09g19310D	chrC09	AT5G46330	FLS2	0	0	0	0	1.73211	1.94981	1.6416	0
protein amino acid phosphorylation	GO:0006468	BnaCnng23380D	chrCnn_random	AT4G38470	ACT_like_protein_tyrosine_kinase_family_protein	0	0	0	0	1.75227	2.14384	1.38247	0
protein amino acid phosphorylation	GO:0006468	BnaC09g09850D	chrC09	AT2G19130	S_locus_lectin_protein_kinase_family_protein	0.781472	0.765823	0.935681	0.513762	0.78863	0.835584	0	0.654773
protein amino acid phosphorylation	GO:0006468	BnaA06g14550D	chrA06	AT1G20650	Protein_kinase_superfamily_protein	0	0	1.45373	0	1.74646	0	2.06747	0
protein amino acid phosphorylation	GO:0006468	BnaC08g06900D	chrC08	AT1G34420	leucine_rich_repeat_transmembrane_protein_kinase_family_protein	0.803789	0	0.84705	0.718586	0.548846	0.998086	0.618006	0.677281
protein amino acid phosphorylation	GO:0006468	BnaA09g02190D	chrA09	AT3G28040	Leucine_rich_receptor_like_protein_kinase_family_protein	0	0	0	0	2.43223	0	2.70938	0
protein amino acid phosphorylation	GO:0006468	BnaC03g14610D	chrC03	AT5G54380	THE1	0	0	0	0	1.08657	1.42369	1.09435	1.52053
protein amino acid phosphorylation	GO:0006468	BnaC06g21910D	chrC06	AT1G76360	Protein_kinase_superfamily_protein	0.894523	0.745777	0	0	1.00753	1.05882	0.618982	0.757259
protein amino acid phosphorylation	GO:0006468	BnaA07g26070D	chrA07	AT1G66830	Leucine_rich_repeat_protein_kinase_family_protein	0	0	0	0	2.21152	2.82894	0	0
protein amino acid phosphorylation	GO:0006468	BnaC08g24800D	chrC08	AT3G53810	Concanavalin_A_like_lectin_protein_kinase_family_protein	0	0	0	0	1.08876	0.960122	1.7941	1.11098
protein amino acid phosphorylation	GO:0006468	BnaC08g38290D	chrC08	AT1G16670	Protein_kinase_superfamily_protein	0	0	1.19459	0	0	2.44465	0	1.29594
protein amino acid phosphorylation	GO:0006468	BnaCnng29780D	chrCnn_random	AT1G69790	Protein_kinase_superfamily_protein	0	0	0	0	0	4.92087	0	0
protein amino acid phosphorylation	GO:0006468	BnaC07g19920D	chrC07	AT5G47070	Protein_kinase_superfamily_protein	0	0	1.01556	0	0.845005	0.636439	1.05192	1.30357
protein amino acid phosphorylation	GO:0006468	BnaC03g44690D	chrC03	AT3G25070	RIN4	0.878852	0.642792	0.695844	0	0.767656	0.902952	0.902168	0
protein amino acid phosphorylation	GO:0006468	BnaA01g29140D	chrA01	AT3G14840	Leucine_rich_repeat_transmembrane_protein_kinase	1.02388	0	0.936511	0	1.16816	1.07378	0.586792	0
protein amino acid phosphorylation	GO:0006468	BnaA07g26110D	chrA07	AT1G66880	Protein_kinase_superfamily_protein	0.801812	0	0.735133	0	0.744694	0.730215	0.986559	0.695893
protein amino acid phosphorylation	GO:0006468	BnaC03g28260D	chrC03	AT4G08850	Leucine_rich_repeat_receptor_like_protein_kinase_family_protein	0	0	0.644808	0.711711	1.07163	1.05301	1.18574	0
protein amino acid phosphorylation	GO:0006468	BnaC06g35270D	chrC06	AT1G74360	Leucine_rich_repeat_protein_kinase_family_protein	1.11795	0	0.769439	0	0.736084	1.14336	0	0.864062
protein amino acid phosphorylation	GO:0006468	BnaC04g41700D	chrC04	AT2G31010	Protein_kinase_superfamily_protein	0	0	0	0	1.92179	0.869297	1.05936	0.729415
protein amino acid phosphorylation	GO:0006468	BnaA03g01490D	chrA03	AT5G04870	CPK1_ATCPK1	0.65287	0	0.650478	0	1.18248	0.507865	0.749441	0.834423
protein amino acid phosphorylation	GO:0006468	BnaA07g31480D	chrA07	AT1G74360	Leucine_rich_repeat_protein_kinase_family_protein	1.04042	0	0.869039	0	0.643015	1.15605	0	0.859724
protein amino acid phosphorylation	GO:0006468	BnaA04g26130D	chrA04	AT2G45340	Leucine_rich_repeat_protein_kinase_family_protein	0	0	0	0	1.83666	0	1.52283	1.19242
protein amino acid phosphorylation	GO:0006468	BnaC03g38110D	chrC03	AT3G13690	Protein_kinase_protein_with_adenine_nucleotide_alpha_hydrolases_like_domain	0	0	0	0	1.82355	0	2.02611	0.679516
protein amino acid phosphorylation	GO:0006468	BnaAnng17990D	chrAnn_random	AT4G38470	ACT_like_protein_tyrosine_kinase_family_protein	0	0	0	0	1.46321	1.76916	1.2631	0
protein amino acid phosphorylation	GO:0006468	BnaA08g21390D	chrA08	AT1G21270	WAK2	0	1.48519	0	1.39298	0	0	1.61351	0
protein amino acid phosphorylation	GO:0006468	BnaC02g03210D	chrC02	AT5G03320	Protein_kinase_superfamily_protein	0	0	0	0	1.35179	2.06227	1.07638	0
protein amino acid phosphorylation	GO:0006468	BnaA09g20430D	chrA09	AT4G04510	CRK38	0	0	1.21061	0	1.28358	0.814322	1.15726	0
protein amino acid phosphorylation	GO:0006468	BnaC06g24940D	chrC06	AT1G70130	Concanavalin_A_like_lectin_protein_kinase_family_protein	0	0	0	0	3.02779	0	0	1.43411
protein amino acid phosphorylation	GO:0006468	BnaA07g02330D	chrA07	AT4G38470	ACT_like_protein_tyrosine_kinase_family_protein	0	0	0	0	1.40513	1.91274	1.12197	0
protein amino acid phosphorylation	GO:0006468	BnaA01g22600D	chrA01	AT1G61380	SD1_29	1.08793	0	0	0	1.68265	1.66418	0	0
protein amino acid phosphorylation	GO:0006468	BnaA08g08390D	chrA08	AT4G17660	Protein_kinase_superfamily_protein	0	0	0	1.44014	1.19817	0	1.78889	0
protein amino acid phosphorylation	GO:0006468	BnaCnng14670D	chrCnn_random	AT4G13190	Protein_kinase_superfamily_protein	0	0	0	0	1.59214	1.46747	1.35308	0
protein amino acid phosphorylation	GO:0006468	BnaC05g13410D	chrC05	AT1G17230	Leucine_rich_receptor_like_protein_kinase_family_protein	0.986837	0	0	0	1.51322	1.15522	0.749235	0
protein amino acid phosphorylation	GO:0006468	BnaC04g50350D	chrC04	AT2G45590	Protein_kinase_superfamily_protein	0	0	0	0	1.21775	0.906997	0.969755	1.27752
protein amino acid phosphorylation	GO:0006468	BnaC03g38730D	chrC03	AT3G14840	Leucine_rich_repeat_transmembrane_protein_kinase	0	0	0	0	1.81504	0	1.56517	0.967546
protein amino acid phosphorylation	GO:0006468	BnaA03g24050D	chrA03	AT4G09570	CPK4_ATCPK4	0.572627	0	0.570237	0.509992	0.618518	0.737899	0.741632	0.564495
protein amino acid phosphorylation	GO:0006468	BnaC09g48740D	chrC09	AT5G06820	SRF2	0	0	0	0	1.50312	0	1.45082	1.36081
protein amino acid phosphorylation	GO:0006468	BnaC04g49860D	chrC04	AT2G44830	Protein_kinase_superfamily_protein	0	0	0	0	1.20946	0	2.09372	0.968623
protein amino acid phosphorylation	GO:0006468	BnaC09g03660D	chrC09	AT5G26570	PWD_OK1_ATGWD3	0.707599	0	0	0	1.07112	0.734872	0.917701	0.798996
protein amino acid phosphorylation	GO:0006468	BnaC01g13360D	chrC01	AT4G21940	CPK15	0.696143	0	0.93365	0	0.957931	0	0.98004	0.660563
protein amino acid phosphorylation	GO:0006468	BnaA01g32040D	chrA01	AT3G09830	Protein_kinase_superfamily_protein	0.58846	0	0.885846	0	0.916153	0.673238	0.57755	0.562041
protein amino acid phosphorylation	GO:0006468	BnaC06g16090D	chrC06	AT3G57760	Protein_kinase_superfamily_protein	0	0	0	0	1.70908	2.4885	0	0
protein amino acid phosphorylation	GO:0006468	BnaAnng32540D	chrAnn_random	AT4G38470	ACT_like_protein_tyrosine_kinase_family_protein	0	0	0	0	1.22503	1.82037	1.07378	0
protein amino acid phosphorylation	GO:0006468	BnaA04g16770D	chrA04	AT2G28940	Protein_kinase_superfamily_protein	0	0	0	0	1.47335	0.920824	1.70115	0
protein amino acid phosphorylation	GO:0006468	BnaC09g35920D	chrC09	AT5G60280	Concanavalin_A_like_lectin_protein_kinase_family_protein	0	0.923603	1.0441	0.938048	0	0	0	1.17141
protein amino acid phosphorylation	GO:0006468	BnaA09g56440D	chrA09_random	AT1G16150	WAKL4	0	0	0	0	1.51275	0.795884	1.69854	0
protein amino acid phosphorylation	GO:0006468	BnaA03g14760D	chrA03	AT2G31880	SOBIR1_EVR	0	0.655278	0.70697	0.784649	0	0.835115	0	1.00962
protein amino acid phosphorylation	GO:0006468	BnaA02g21140D	chrA02	AT4G04570	CRK40	0	0	0.666408	0	1.1693	0.720434	1.39564	0
protein amino acid phosphorylation	GO:0006468	BnaA09g17950D	chrA09	AT5G46330	FLS2	0	0	0	0	1.7044	2.21296	0	0
protein amino acid phosphorylation	GO:0006468	BnaA09g54750D	chrA09_random	AT3G53810	Concanavalin_A_like_lectin_protein_kinase_family_protein	0	0	0	0	1.41451	1.62908	0.871555	0
protein amino acid phosphorylation	GO:0006468	BnaC02g19910D	chrC02	AT1G70530	CRK3	0.661604	0	0.923243	0.82381	0	0.619687	0	0.864874
protein amino acid phosphorylation	GO:0006468	BnaC03g29400D	chrC03	AT4G11530	CRK34	0	0	0	0	1.71101	0.957714	0.989153	0
protein amino acid phosphorylation	GO:0006468	BnaC08g38520D	chrC08	AT1G16150	WAKL4	0	0	0	0	1.10803	1.64057	0.861456	0
protein amino acid phosphorylation	GO:0006468	BnaA09g56220D	chrA09_random	AT1G16670	Protein_kinase_superfamily_protein	0	0	0	0	1.61319	1.90198	0	0
protein amino acid phosphorylation	GO:0006468	BnaC06g12670D	chrC06	AT5G39000	Malectin_receptor_like_protein_kinase_family_protein	0.73663	0.727685	0.748095	0.722066	0	0.559168	0	0
protein amino acid phosphorylation	GO:0006468	BnaC02g44350D	chrC02_random	AT5G59680	Leucine_rich_repeat_protein_kinase_family_protein	0	0	0	0	0	0	1.16508	2.30225
protein amino acid phosphorylation	GO:0006468	BnaA03g32990D	chrA03	AT3G13690	Protein_kinase_protein_with_adenine_nucleotide_alpha_hydrolases_like_domain	0	0	0	0	2.13194	0	1.33153	0
protein amino acid phosphorylation	GO:0006468	BnaA09g52450D	chrA09_random	AT5G65500	U_box_domain_containing_protein_kinase_family_protein	0	0	0	0	0	0	2.09861	1.2998
protein amino acid phosphorylation	GO:0006468	BnaA03g11880D	chrA03	AT5G54380	THE1	0	0	0	0	0	1.4213	0	1.88961
protein amino acid phosphorylation	GO:0006468	BnaC02g26350D	chrC02	AT4G04740	member_of_Calcium_Dependent_Protein_Kinase	0.542578	0	0	0	0.888842	0.589097	0.619736	0.667697
protein amino acid phosphorylation	GO:0006468	BnaA04g18600D	chrA04	AT2G31880	SOBIR1_EVR	0.599543	0	0.872497	0.605408	0	0.584557	0	0.577846
protein amino acid phosphorylation	GO:0006468	BnaA03g24820D	chrA03	AT4G11900	S_locus_lectin_protein_kinase_family_protein	0	0	0	0	1.36875	1.83627	0	0
protein amino acid phosphorylation	GO:0006468	BnaA04g28690D	chrA04_random	AT2G31010	Protein_kinase_superfamily_protein	0	0	0	0	1.34837	1.24272	0	0.611032
protein amino acid phosphorylation	GO:0006468	BnaCnng02880D	chrCnn_random	AT5G03320	Protein_kinase_superfamily_protein	0.650934	0	0.698896	0	0.57478	0.639568	0	0.61018
protein amino acid phosphorylation	GO:0006468	BnaA07g35090D	chrA07	AT1G79680	WAKL10_ATWAKL10	0	0	0	0	1.63125	0	1.51457	0
protein amino acid phosphorylation	GO:0006468	BnaC01g14880D	chrC01	AT4G23320	CRK24	0	0	0.510417	0.535798	0.798653	0.576398	0.680575	0
protein amino acid phosphorylation	GO:0006468	BnaC07g14590D	chrC07	AT1G21270	WAK2	0.892227	0	0	0	0	0	0.896411	1.25811
protein amino acid phosphorylation	GO:0006468	BnaCnng04390D	chrCnn_random	AT1G61610	S_locus_lectin_protein_kinase_family_protein	0	0	0	0	1.2075	0	0.93832	0.856086
protein amino acid phosphorylation	GO:0006468	BnaC06g31680D	chrC06	AT1G70530	CRK3	0	0	0	0	1.04836	0.846273	1.10352	0
protein amino acid phosphorylation	GO:0006468	BnaC05g16900D	chrC05	AT1G21590	Protein_kinase_protein_with_adenine_nucleotide_alpha_hydrolases_like_domain	0	0	0	0	1.48735	0	1.42365	0
protein amino acid phosphorylation	GO:0006468	BnaC03g17800D	chrC03	AT2G31880	SOBIR1_EVR	0	0	0.90126	0.579452	0	0.632283	0	0.784432
protein amino acid phosphorylation	GO:0006468	BnaA03g33550D	chrA03	AT3G14840	Leucine_rich_repeat_transmembrane_protein_kinase	0	0	0	0	1.31708	0	1.06193	0.514495
protein amino acid phosphorylation	GO:0006468	BnaA06g31690D	chrA06	AT3G28040	Leucine_rich_receptor_like_protein_kinase_family_protein	0	0	0	0	1.14782	0	1.00989	0.687399
protein amino acid phosphorylation	GO:0006468	BnaC01g14710D	chrC01	AT4G23290	CRK21	0	0	0	0	0	0.70201	0.695411	1.39488
protein amino acid phosphorylation	GO:0006468	BnaA10g20620D	chrA10	AT5G12000	Protein_kinase_protein_with_adenine_nucleotide_alpha_hydrolases_like_domain	0	0	0	0	1.36284	1.39921	0	0
protein amino acid phosphorylation	GO:0006468	BnaC03g27450D	chrC03	AT2G23450	Protein_kinase_superfamily_protein	0.629764	0	0.740686	0.819887	0	0	0	0.519889
protein amino acid phosphorylation	GO:0006468	BnaA05g04780D	chrA05	AT2G45340	Leucine_rich_repeat_protein_kinase_family_protein	0	0	0	0	1.1706	0	0.984455	0.517794
protein amino acid phosphorylation	GO:0006468	BnaC03g48840D	chrC03	AT5G65500	U_box_domain_containing_protein_kinase_family_protein	0	0	0	0	0.796408	0	0.992964	0.883082
protein amino acid phosphorylation	GO:0006468	BnaC07g24940D	chrC07	AT3G28040	Leucine_rich_receptor_like_protein_kinase_family_protein	0	0	0	0	1.08192	0	0.894035	0.690216
protein amino acid phosphorylation	GO:0006468	BnaA07g11020D	chrA07	AT1G21270	WAK2	0.84083	0	0	0	0	0	0.840432	0.972092
protein amino acid phosphorylation	GO:0006468	BnaCnng47490D	chrCnn_random	AT3G57120	Protein_kinase_superfamily_protein	0	0	0.659035	0	0	1.14014	0	0.8018
protein amino acid phosphorylation	GO:0006468	BnaA02g31820D	chrA02	AT5G25930	Protein_kinase_family_protein_with_leucine_rich_repeat_domain	0.574098	0	0	0	0.599698	0.827292	0.577594	0
protein amino acid phosphorylation	GO:0006468	BnaCnng45050D	chrCnn_random	AT1G21230	WAK5	0.821831	0	0	0	0	0	1.00953	0.743596
protein amino acid phosphorylation	GO:0006468	BnaC04g53150D	chrC04_random	AT2G45340	Leucine_rich_repeat_protein_kinase_family_protein	0	0	0	0	1.1412	0	0.820393	0.58744
protein amino acid phosphorylation	GO:0006468	BnaC04g56910D	chrC04_random	AT2G45340	Leucine_rich_repeat_protein_kinase_family_protein	0	0	0	0	1.23713	0	1.21572	0
protein amino acid phosphorylation	GO:0006468	BnaC04g40150D	chrC04	AT2G28940	Protein_kinase_superfamily_protein	0	0	0	0	1.18003	0	1.25217	0
protein amino acid phosphorylation	GO:0006468	BnaC05g43190D	chrC05	AT3G09830	Protein_kinase_superfamily_protein	0.744111	0	1.02394	0	0	0.657428	0	0
protein amino acid phosphorylation	GO:0006468	BnaC03g59440D	chrC03	AT1G29750	RKF1	0	0	0	0	1.0891	1.2771	0	0
protein amino acid phosphorylation	GO:0006468	BnaC09g07000D	chrC09	AT5G65500	U_box_domain_containing_protein_kinase_family_protein	0	0	0	0	0	1.18311	1.17534	0
protein amino acid phosphorylation	GO:0006468	BnaA09g04240D	chrA09	AT5G26570	PWD_OK1_ATGWD3	0	0	0	0	0.837201	0	0.842696	0.653948
protein amino acid phosphorylation	GO:0006468	BnaC09g44650D	chrC09	AT5G12000	Protein_kinase_protein_with_adenine_nucleotide_alpha_hydrolases_like_domain	0	0	0	0	1.10507	1.2163	0	0
protein amino acid phosphorylation	GO:0006468	BnaC08g28060D	chrC08	AT3G57120	Protein_kinase_superfamily_protein	0	0	0	0	0	2.31702	0	0
protein amino acid phosphorylation	GO:0006468	BnaA02g16030D	chrA02	AT1G72540	Protein_kinase_superfamily_protein	0	0	0.978492	0	0	0	1.32369	0
protein amino acid phosphorylation	GO:0006468	BnaC03g28620D	chrC03	AT4G09570	CPK4_ATCPK4	0.520114	0	0	0	0.679896	0.524845	0.523884	0
protein amino acid phosphorylation	GO:0006468	BnaA10g24120D	chrA10	AT5G06820	SRF2	0	0	0	0	1.37402	0	0.871739	0
protein amino acid phosphorylation	GO:0006468	BnaA09g36490D	chrA09	AT3G57120	Protein_kinase_superfamily_protein	0	0	0	0	0	2.19336	0	0
protein amino acid phosphorylation	GO:0006468	BnaC02g16920D	chrC02	AT1G66880	Protein_kinase_superfamily_protein	0.547939	0.516614	0.501755	0	0	0.618433	0	0
protein amino acid phosphorylation	GO:0006468	BnaA03g23760D	chrA03	AT4G08850	Leucine_rich_repeat_receptor_like_protein_kinase_family_protein	0	0	0	0	0	0.976994	0.664903	0.538381
protein amino acid phosphorylation	GO:0006468	BnaA07g11040D	chrA07	AT1G21270	WAK2	0	0	0	0	0	0	0.814208	1.34447
protein amino acid phosphorylation	GO:0006468	BnaA08g17760D	chrA08	AT1G29750	RKF1	0	0	0	0	1.09869	1.02985	0	0
protein amino acid phosphorylation	GO:0006468	BnaA09g41970D	chrA09	AT2G23450	Protein_kinase_superfamily_protein	0.730763	0	0	0	0.670915	0.71512	0	0
protein amino acid phosphorylation	GO:0006468	BnaC05g22710D	chrC05	AT1G29740	Leucine_rich_repeat_transmembrane_protein_kinase	0	0	0	0	1.21406	0.858637	0	0
protein amino acid phosphorylation	GO:0006468	BnaCnng52460D	chrCnn_random	AT1G76040	CPK29	0	0	0	0.674552	0	0.682137	0	0.692929
protein amino acid phosphorylation	GO:0006468	BnaA09g26700D	chrA09	AT1G29740	Leucine_rich_repeat_transmembrane_protein_kinase	0	0	0	0	0	2.01638	0	0
protein amino acid phosphorylation	GO:0006468	BnaC01g14890D	chrC01	AT4G23320	CRK24	0.86027	0	0.642797	0	0	0.506411	0	0
protein amino acid phosphorylation	GO:0006468	BnaA09g26680D	chrA09	AT1G29740	Leucine_rich_repeat_transmembrane_protein_kinase	0	0	0	0	1.16988	0.820673	0	0
protein amino acid phosphorylation	GO:0006468	BnaC03g29890D	chrC03	AT4G04540	CRK39	0.986518	0	0	0	0.996036	0	0	0
protein amino acid phosphorylation	GO:0006468	BnaA04g26300D	chrA04	AT2G45590	Protein_kinase_superfamily_protein	0	0	0	0	0.929234	0	1.0207	0
protein amino acid phosphorylation	GO:0006468	BnaC02g26130D	chrC02	AT4G04570	CRK40	0	0	0	0	0.759082	0	1.16924	0
protein amino acid phosphorylation	GO:0006468	BnaA02g31620D	chrA02	AT5G26570	PWD_OK1_ATGWD3	0	0	0	0	0.538109	0	0.761906	0.591386
protein amino acid phosphorylation	GO:0006468	BnaA10g26620D	chrA10	AT5G03320	Protein_kinase_superfamily_protein	0.570037	0	0.576419	0	0	0.688352	0	0
protein amino acid phosphorylation	GO:0006468	BnaC03g01790D	chrC03	AT5G04870	CPK1_ATCPK1	0.549521	0	0.653105	0	0.59419	0	0	0
protein amino acid phosphorylation	GO:0006468	BnaA07g17490D	chrA07	AT3G57760	Protein_kinase_superfamily_protein	0	0	0	0	0	1.78915	0	0
protein amino acid phosphorylation	GO:0006468	BnaA04g27230D	chrA04_random	AT3G59750	Concanavalin_A_like_lectin_protein_kinase_family_protein	0	0	0	0	0	1.63992	0	0
protein amino acid phosphorylation	GO:0006468	BnaA02g21060D	chrA02	AT4G04740	member_of_Calcium_Dependent_Protein_Kinase	0.517192	0	0	0	0.583674	0	0.517411	0
protein amino acid phosphorylation	GO:0006468	BnaC07g06290D	chrC07	AT2G17220	Protein_kinase_superfamily_protein	0.62153	0	0.967627	0	0	0	0	0
protein amino acid phosphorylation	GO:0006468	BnaA04g13650D	chrA04	AT2G23450	Protein_kinase_superfamily_protein	0	0	0	0	0.597587	0.927617	0	0
protein amino acid phosphorylation	GO:0006468	BnaC07g43760D	chrC07	AT4G32300	SD2_5	0	0	0	0	0	0.701217	0.803138	0
protein amino acid phosphorylation	GO:0006468	BnaA01g04670D	chrA01	AT4G32300	SD2_5	0.566508	0	0	0	0	0.916392	0	0
protein amino acid phosphorylation	GO:0006468	BnaC06g24200D	chrC06	AT1G72180	Leucine_rich_receptor_like_protein_kinase_family_protein	0	0	0	0	0	0	0	1.48243
protein amino acid phosphorylation	GO:0006468	BnaA03g14220D	chrA03	AT2G31010	Protein_kinase_superfamily_protein	0	0	0	0	0.849697	0	0.632459	0
protein amino acid phosphorylation	GO:0006468	BnaC05g22700D	chrC05	AT1G29740	Leucine_rich_repeat_transmembrane_protein_kinase	0	0	0	0	0	1.41322	0	0
protein amino acid phosphorylation	GO:0006468	BnaC05g16460D	chrC05	AT1G21270	WAK2	0	0	0	0	0	0	1.3611	0
protein amino acid phosphorylation	GO:0006468	BnaA08g05370D	chrA08	AT1G70530	CRK3	0	0	0	0	0.555301	0.798222	0	0
protein amino acid phosphorylation	GO:0006468	BnaC02g48400D	chrC02_random	AT5G26570	PWD_OK1_ATGWD3	0	0	0	0	0	0	0.58767	0.753272
protein amino acid phosphorylation	GO:0006468	BnaA01g12930D	chrA01	AT4G23300	CRK22	0.628371	0	0.705733	0	0	0	0	0
protein amino acid phosphorylation	GO:0006468	BnaC07g10810D	chrC07	AT1G25390	Protein_kinase_superfamily_protein	0	0	0	0	0	0	0.595831	0.7184
protein amino acid phosphorylation	GO:0006468	BnaC04g22860D	chrC04	AT3G59750	Concanavalin_A_like_lectin_protein_kinase_family_protein	0	0	0	0	0	1.28783	0	0
protein amino acid phosphorylation	GO:0006468	BnaA07g14290D	chrA07	AT2G28940	Protein_kinase_superfamily_protein	0	0	0	0	0	0	0.677345	0.604642
protein amino acid phosphorylation	GO:0006468	BnaA08g10530D	chrA08	AT4G23300	CRK22	0.532965	0	0.737149	0	0	0	0	0
protein amino acid phosphorylation	GO:0006468	BnaC03g17200D	chrC03	AT2G31010	Protein_kinase_superfamily_protein	0	0	0	0	0.702569	0	0.532232	0
protein amino acid phosphorylation	GO:0006468	BnaA05g28720D	chrA05	AT3G09830	Protein_kinase_superfamily_protein	0.516931	0	0.69775	0	0	0	0	0
protein amino acid phosphorylation	GO:0006468	BnaC03g29910D	chrC03	AT4G04510	CRK38	0	0	0	0	0	1.15285	0	0
protein amino acid phosphorylation	GO:0006468	BnaC04g35920D	chrC04	AT2G23450	Protein_kinase_superfamily_protein	0	0	0	0	0.600924	0.548482	0	0
protein amino acid phosphorylation	GO:0006468	BnaCnng60590D	chrCnn_random	AT4G04510	CRK38	0	0	0	0	1.12372	0	0	0
protein amino acid phosphorylation	GO:0006468	BnaA02g12620D	chrA02	AT1G66880	Protein_kinase_superfamily_protein	0	0.548889	0	0	0	0.568863	0	0
protein amino acid phosphorylation	GO:0006468	BnaC05g20690D	chrC05	AT1G25390	Protein_kinase_superfamily_protein	1.10378	0	0	0	0	0	0	0
protein amino acid phosphorylation	GO:0006468	BnaCnng60020D	chrCnn_random	AT2G23450	Protein_kinase_superfamily_protein	0.502283	0	0	0	0	0.585591	0	0
protein amino acid phosphorylation	GO:0006468	BnaA03g45850D	chrA03	AT4G23300	CRK22	0	0	0	0	0	1.05721	0	0
protein amino acid phosphorylation	GO:0006468	BnaC02g21450D	chrC02	AT1G72540	Protein_kinase_superfamily_protein	0	0	0	0	0	0	1.04375	0
protein amino acid phosphorylation	GO:0006468	BnaC08g38280D	chrC08	AT1G16670	Protein_kinase_superfamily_protein	0	0	0	0	0	0.999148	0	0
protein amino acid phosphorylation	GO:0006468	BnaA09g04550D	chrA09	AT5G25440	Protein_kinase_superfamily_protein	0	0	0	0	0.986506	0	0	0
protein amino acid phosphorylation	GO:0006468	BnaC06g17270D	chrC06	AT3G59350	Protein_kinase_superfamily_protein	0	0	0	0	0	0.98362	0	0
protein amino acid phosphorylation	GO:0006468	BnaA09g47660D	chrA09	AT1G11280	S_locus_lectin_protein_kinase_family_protein	0	0	0	0	0.936888	0	0	0
protein amino acid phosphorylation	GO:0006468	BnaC05g12740D	chrC05	AT1G16670	Protein_kinase_superfamily_protein	0	0	0	0	0	0.933521	0	0
protein amino acid phosphorylation	GO:0006468	BnaC08g28780D	chrC08	AT3G57760	Protein_kinase_superfamily_protein	0	0	0	0	0	0	0.914702	0
protein amino acid phosphorylation	GO:0006468	BnaA07g18330D	chrA07	AT3G59350	Protein_kinase_superfamily_protein	0	0	0	0	0	0.887351	0	0
protein amino acid phosphorylation	GO:0006468	BnaC03g57050D	chrC03	AT3G47580	Leucine_rich_repeat_protein_kinase_family_protein	0	0	0	0	0.883328	0	0	0
protein amino acid phosphorylation	GO:0006468	BnaC07g14600D	chrC07	AT1G21270	WAK2	0	0	0	0	0	0	0	0.868852
protein amino acid phosphorylation	GO:0006468	BnaA01g32250D	chrA01	AT3G08870	Concanavalin_A_like_lectin_protein_kinase_family_protein	0	0	0	0	0	0	0	0.855564
protein amino acid phosphorylation	GO:0006468	BnaA10g13110D	chrA10	AT5G60280	Concanavalin_A_like_lectin_protein_kinase_family_protein	0	0	0	0	0	0	0	0.854107
protein amino acid phosphorylation	GO:0006468	BnaC02g40450D	chrC02	AT5G25930	Protein_kinase_family_protein_with_leucine_rich_repeat_domain	0	0	0	0	0	0.800121	0	0
protein amino acid phosphorylation	GO:0006468	BnaCnng59240D	chrCnn_random	AT4G11480	CRK32	0	0	0	0	0	0.796142	0	0
protein amino acid phosphorylation	GO:0006468	BnaAnng25580D	chrAnn_random	AT4G23320	CRK24	0.758937	0	0	0	0	0	0	0
protein amino acid phosphorylation	GO:0006468	BnaA05g18880D	chrA05	AT3G20200	Protein_kinase_protein_with_adenine_nucleotide_alpha_hydrolases_like_domain	0	0	0	0	0.756169	0	0	0
protein amino acid phosphorylation	GO:0006468	BnaA03g40330D	chrA03	AT5G61560	U_box_domain_containing_protein_kinase_family_protein	0	0	0.743316	0	0	0	0	0
protein amino acid phosphorylation	GO:0006468	BnaA03g53250D	chrA03	AT4G35310	CPK5_ATCPK5	0	0	0	0	0.742319	0	0	0
protein amino acid phosphorylation	GO:0006468	BnaC03g71060D	chrC03	AT1G56145	Leucine_rich_repeat_transmembrane_protein_kinase	0	0	0	0	0	0.721559	0	0
protein amino acid phosphorylation	GO:0006468	BnaA08g00070D	chrA08	AT1G56145	Leucine_rich_repeat_transmembrane_protein_kinase	0	0	0	0	0	0.695657	0	0
protein amino acid phosphorylation	GO:0006468	BnaC01g10660D	chrC01	AT4G18250	receptor_serine_threonine_kinase_putative	0	0	0.693901	0	0	0	0	0
protein amino acid phosphorylation	GO:0006468	BnaA07g21420D	chrA07	AT1G76360	Protein_kinase_superfamily_protein	0.689897	0	0	0	0	0	0	0
protein amino acid phosphorylation	GO:0006468	BnaC01g38950D	chrC01	AT3G09830	Protein_kinase_superfamily_protein	0	0	0.684836	0	0	0	0	0
protein amino acid phosphorylation	GO:0006468	BnaCnng54760D	chrCnn_random	AT5G54380	THE1	0	0	0	0	0	0	0	0.671106
protein amino acid phosphorylation	GO:0006468	BnaCnng00040D	chrCnn_random	AT3G25070	RIN4	0	0	0	0	0	0	0.655447	0
protein amino acid phosphorylation	GO:0006468	BnaA08g12250D	chrA08	AT4G32300	SD2_5	0	0	0	0	0	0	0.647093	0
protein amino acid phosphorylation	GO:0006468	BnaA07g17480D	chrA07	AT3G57770	Protein_kinase_superfamily_protein	0	0	0	0	0	0.645195	0	0
protein amino acid phosphorylation	GO:0006468	BnaCnng60310D	chrCnn_random	AT4G23300	CRK22	0	0	0.586014	0	0	0	0	0
protein amino acid phosphorylation	GO:0006468	BnaCnng51670D	chrCnn_random	AT5G47070	Protein_kinase_superfamily_protein	0	0	0	0	0.555016	0	0	0
protein amino acid phosphorylation	GO:0006468	BnaA02g12640D	chrA02	AT1G66920	Protein_kinase_superfamily_protein	0.513679	0	0	0	0	0	0	0
protein amino acid phosphorylation	GO:0006468	BnaA03g60150D	chrA03_random	AT1G61500	S_locus_lectin_protein_kinase_family_protein	0	0	0	0	0	0.825458	-0.808133	0
protein amino acid phosphorylation	GO:0006468	BnaCnng04150D	chrCnn_random	AT1G61500	S_locus_lectin_protein_kinase_family_protein	0	0	0.502523	0	0	0	-0.634101	0
protein amino acid phosphorylation	GO:0006468	BnaC01g06190D	chrC01	AT4G32300	SD2_5	0	0	0	0	0	0.569287	-0.548297	-0.681843
response to salicylic acid stimulus	GO:0009751	BnaCnng52600D	chrCnn_random	AT3G56400	WRKY70_ATWRKY70	5.61943	5.20407	4.58125	5.31547	3.58388	4.40737	5.23391	4.29677
response to salicylic acid stimulus	GO:0009751	BnaA04g02560D	chrA04	AT3G56400	WRKY70_ATWRKY70	5.10455	4.82579	5.24748	5.54733	3.9815	4.00947	4.95472	4.36222
response to salicylic acid stimulus	GO:0009751	BnaC02g04650D	chrC02	AT5G13320	PBS3_GDG1_WIN3_GH3_12	4.34281	4.0295	3.18011	3.64559	4.76179	6.84556	3.44636	4.98958
response to salicylic acid stimulus	GO:0009751	BnaA02g01560D	chrA02	AT5G13320	PBS3_GDG1_WIN3_GH3_12	4.43643	4.15737	3.60946	3.33286	4.37747	6.18627	3.62441	4.79526
response to salicylic acid stimulus	GO:0009751	BnaA02g05730D	chrA02	AT5G22570	WRKY38_ATWRKY38	4.83616	3.14734	3.13104	3.49124	3.51495	4.83867	4.17555	3.3641
response to salicylic acid stimulus	GO:0009751	BnaC02g09670D	chrC02	AT5G22570	WRKY38_ATWRKY38	4.72692	2.46495	3.45016	2.22083	4.36543	3.72942	4.59369	2.57086
response to salicylic acid stimulus	GO:0009751	BnaAnng39080D	chrAnn_random	AT5G22570	WRKY38_ATWRKY38	3.62237	3.5213	2.51644	3.20721	2.9178	4.69308	4.25048	3.35763
response to salicylic acid stimulus	GO:0009751	BnaC03g05810D	chrC03	AT5G13320	PBS3_GDG1_WIN3_GH3_12	4.05435	2.45322	3.35078	2.65839	3.0075	2.87805	3.19003	3.49946
response to salicylic acid stimulus	GO:0009751	BnaC06g15910D	chrC06	AT3G56400	WRKY70_ATWRKY70	3.36754	3.33141	3.13901	3.10164	2.54258	2.17672	3.68653	3.10747
response to salicylic acid stimulus	GO:0009751	BnaA07g16850D	chrA07	AT3G56400	WRKY70_ATWRKY70	3.41318	3.13843	2.81703	2.71029	2.73423	2.18184	3.79572	2.84663
response to salicylic acid stimulus	GO:0009751	BnaC09g36400D	chrC09	AT5G22570	WRKY38_ATWRKY38	3.63937	2.63084	2.96142	2.53422	2.97575	2.2551	2.72889	2.45537
response to salicylic acid stimulus	GO:0009751	BnaA02g02580D	chrA02	AT5G15310	ATMYB16_ATMIXTA_MYB16	2.0795	2.69767	3.41557	3.73187	3.14358	0	3.00008	2.61597
response to salicylic acid stimulus	GO:0009751	BnaC06g29460D	chrC06	AT1G68320	MYB62_AtMYB62_BW62B_BW62C	2.38478	3.34345	1.38646	1.91607	2.67839	2.93556	2.04227	3.07772
response to salicylic acid stimulus	GO:0009751	BnaAnng00020D	chrAnn_random	AT5G01900	WRKY62_ATWRKY62	2.42265	1.97847	1.95974	1.58708	2.72979	2.86513	2.25177	2.5231
response to salicylic acid stimulus	GO:0009751	BnaC06g35350D	chrC06	AT1G74430	MYB95_ATMYB95_ATMYBCP66	2.20114	3.15565	1.25229	2.80368	1.973	1.74361	2.31646	2.58558
response to salicylic acid stimulus	GO:0009751	BnaC08g27340D	chrC08	AT3G56400	WRKY70_ATWRKY70	2.13921	1.84405	1.92281	1.58316	2.87378	1.68313	3.41616	2.2839
response to salicylic acid stimulus	GO:0009751	BnaC07g32870D	chrC07	AT3G52430	PAD4_ATPAD4	2.7716	2.3789	2.6593	1.98312	1.34595	1.90975	2.123	2.3332
response to salicylic acid stimulus	GO:0009751	BnaA10g19970D	chrA10	AT5G13320	PBS3_GDG1_WIN3_GH3_12	2.37775	1.67937	2.29568	1.54446	2.34494	2.21267	2.30774	1.93627
response to salicylic acid stimulus	GO:0009751	BnaA07g26980D	chrA07	AT1G68320	MYB62_AtMYB62_BW62B_BW62C	1.95332	0	1.72141	0	3.6653	3.16546	3.05956	2.7031
response to salicylic acid stimulus	GO:0009751	BnaAnng39300D	chrAnn_random	AT5G40990	GLIP1	0	0	2.20463	0	4.97739	0	5.41988	2.9412
response to salicylic acid stimulus	GO:0009751	BnaC01g06660D	chrC01	AT4G31800	WRKY18_ATWRKY18	1.79765	1.20453	1.86808	1.24555	2.19987	1.55823	2.78828	2.02951
response to salicylic acid stimulus	GO:0009751	BnaC09g43750D	chrC09	AT5G13320	PBS3_GDG1_WIN3_GH3_12	2.12114	1.36867	2.02577	1.27446	1.76939	1.97174	1.94534	2.04538
response to salicylic acid stimulus	GO:0009751	BnaA04g07850D	chrA04	AT5G36970	NHL25	0	0	0	0	6.83033	0	4.09237	3.18048
response to salicylic acid stimulus	GO:0009751	BnaCnng25340D	chrCnn_random	AT5G36970	NHL25	3.22879	0	0	0	2.89765	2.68907	2.9315	2.16818
response to salicylic acid stimulus	GO:0009751	BnaA09g35840D	chrA09	AT3G56400	WRKY70_ATWRKY70	1.61278	1.16484	1.47282	1.13068	2.25269	1.33805	3.02846	1.84049
response to salicylic acid stimulus	GO:0009751	BnaC03g67380D	chrC03	AT4G31800	WRKY18_ATWRKY18	1.27571	0	1.77629	0.99932	2.2754	0	3.94905	2.36774
response to salicylic acid stimulus	GO:0009751	BnaA03g04280D	chrA03	AT5G13320	PBS3_GDG1_WIN3_GH3_12	1.71466	1.01968	1.67947	0.99416	1.2474	1.4777	1.79928	2.36155
response to salicylic acid stimulus	GO:0009751	BnaC04g21900D	chrC04	AT3G61190	BAP1	1.54031	0	1.95176	1.40949	1.96155	1.82747	1.89751	1.29827
response to salicylic acid stimulus	GO:0009751	BnaA05g06820D	chrA05	AT2G37710	RLK	1.50168	1.06807	1.46	1.48669	1.02869	1.24637	2.26771	1.79576
response to salicylic acid stimulus	GO:0009751	BnaC06g37650D	chrC06	AT1G76930	ATEXT1	1.07547	0	0	0	3.35258	2.08067	2.89051	1.96263
response to salicylic acid stimulus	GO:0009751	BnaC08g19780D	chrC08	AT1G21250	WAK1_PRO25	1.46211	0	1.39399	2.08072	1.33852	1.3194	1.74776	0
response to salicylic acid stimulus	GO:0009751	BnaC02g09600D	chrC02	AT5G22570	WRKY38_ATWRKY38	2.56349	0	1.67258	0	1.40199	1.73465	1.75485	0
response to salicylic acid stimulus	GO:0009751	BnaA07g31540D	chrA07	AT1G74430	MYB95_ATMYB95_ATMYBCP66	1.38132	1.38863	1.21673	1.02272	1.08032	0.792118	0.715004	1.0792
response to salicylic acid stimulus	GO:0009751	BnaC04g07660D	chrC04	AT2G37710	RLK	1.04852	0.708149	1.12281	0.991478	0.641408	0.92934	1.16935	1.20928
response to salicylic acid stimulus	GO:0009751	BnaA03g17380D	chrA03	AT2G37710	RLK	1.05243	0	1.15626	1.00144	0.910928	0.772471	1.80207	1.08831
response to salicylic acid stimulus	GO:0009751	BnaC06g35340D	chrC06	AT1G74430	MYB95_ATMYB95_ATMYBCP66	1.47951	1.25447	1.48624	0.954181	1.01043	0	0.746769	0.802229
response to salicylic acid stimulus	GO:0009751	BnaA03g41780D	chrA03	AT3G52430	PAD4_ATPAD4	1.27559	1.1858	1.66489	1.65757	0	0	1.04787	0.864167
response to salicylic acid stimulus	GO:0009751	BnaC05g16490D	chrC05	AT1G21250	WAK1_PRO25	0.677999	0.860572	0.879897	0.814366	0.826097	0.837079	1.39944	1.29913
response to salicylic acid stimulus	GO:0009751	BnaC03g20910D	chrC03	AT2G37710	RLK	0.886919	0	0.917561	0	0.868118	1.29886	1.93606	1.20958
response to salicylic acid stimulus	GO:0009751	BnaA04g00840D	chrA04	AT3G61190	BAP1	1.28496	0	1.98281	0	0.949798	0	2.08453	0
response to salicylic acid stimulus	GO:0009751	BnaAnng35730D	chrAnn_random	AT2G31180	ATMYB14_MYB14AT_MYB14	2.19941	0	0	0	2.10805	1.70924	0	0
response to salicylic acid stimulus	GO:0009751	BnaC08g48600D	chrC08_random	AT3G49690	RAX3_MYB84_ATMYB84	1.48281	1.53015	0	0	0	0	1.53506	1.00015
response to salicylic acid stimulus	GO:0009751	BnaA01g05060D	chrA01	AT4G31800	WRKY18_ATWRKY18	0	0	0	0	1.25618	1.54035	1.33578	1.20018
response to salicylic acid stimulus	GO:0009751	BnaC03g60080D	chrC03	AT4G38620	ATMYB4_MYB4	1.11464	0	0	0	0.888828	1.71816	1.45489	0
response to salicylic acid stimulus	GO:0009751	BnaA04g28770D	chrA04_random	AT2G31180	ATMYB14_MYB14AT_MYB14	1.53976	0	0	0	1.17044	2.44246	0	0
response to salicylic acid stimulus	GO:0009751	BnaCnng23360D	chrCnn_random	AT4G38620	ATMYB4_MYB4	1.17607	0	0	0	1.03081	1.73487	1.13917	0
response to salicylic acid stimulus	GO:0009751	BnaAnng05010D	chrAnn_random	AT5G65790	ATMYB68_MYB68	0.860254	0	0	0	1.16872	1.56935	1.32958	0
response to salicylic acid stimulus	GO:0009751	BnaA07g22240D	chrA07	AT1G74430	MYB95_ATMYB95_ATMYBCP66	0.820986	0	0	0	1.91841	0	1.03753	1.111
response to salicylic acid stimulus	GO:0009751	BnaC02g43910D	chrC02	AT5G65790	ATMYB68_MYB68	1.02537	0	0	0	0.772766	1.03818	1.08351	0.902882
response to salicylic acid stimulus	GO:0009751	BnaC08g31140D	chrC08	AT3G61190	BAP1	0	0	0	0	1.6456	1.71161	1.28769	0
response to salicylic acid stimulus	GO:0009751	BnaA07g21170D	chrA07	AT1G76930	ATEXT1	0	0	0	0	2.14728	1.49424	0.902171	0
response to salicylic acid stimulus	GO:0009751	BnaC04g41990D	chrC04	AT2G31180	ATMYB14_MYB14AT_MYB14	1.69655	0	0	0	0	2.45283	0	0
response to salicylic acid stimulus	GO:0009751	BnaA03g40810D	chrA03	AT3G50410	OBP1	0	0	1.12974	1.24597	0.858798	0	0.835889	0
response to salicylic acid stimulus	GO:0009751	BnaC02g41860D	chrC02	AT5G60890	ATMYB34_ATR1_MYB34	0.852657	0	0	0	0.601016	0.981342	0.930037	0.65825
response to salicylic acid stimulus	GO:0009751	BnaCnng54590D	chrCnn_random	AT3G52430	PAD4_ATPAD4	0.874642	0	1.04796	0.69016	0	0	0.521801	0.505905
response to salicylic acid stimulus	GO:0009751	BnaAnng31050D	chrAnn_random	AT3G61190	BAP1	0	0	0	0	1.15383	1.62634	0.780133	0
response to salicylic acid stimulus	GO:0009751	BnaC07g31770D	chrC07	AT3G50410	OBP1	0	0	0	0	1.12037	0	1.55821	0
response to salicylic acid stimulus	GO:0009751	BnaC03g17390D	chrC03	AT2G31180	ATMYB14_MYB14AT_MYB14	0	0	0	0	0	0	2.50981	0
response to salicylic acid stimulus	GO:0009751	BnaA09g07190D	chrA09	AT5G65790	ATMYB68_MYB68	0	0	0	0	0	2.25006	0	0
response to salicylic acid stimulus	GO:0009751	BnaAnng06630D	chrAnn_random	AT5G60890	ATMYB34_ATR1_MYB34	0	0	0	0	0	1.74547	0	0
response to salicylic acid stimulus	GO:0009751	BnaC08g21910D	chrC08	AT3G50410	OBP1	0	0	0	0	0	0	0.795726	0.92936
response to salicylic acid stimulus	GO:0009751	BnaC06g12110D	chrC06	AT5G36970	NHL25	0	0	0	0	0	1.18861	0	0
response to salicylic acid stimulus	GO:0009751	BnaA08g16990D	chrA08	AT4G38620	ATMYB4_MYB4	0	0	0	0	0	1.14679	0	0
response to salicylic acid stimulus	GO:0009751	BnaAnng32610D	chrAnn_random	AT4G31800	WRKY18_ATWRKY18	0	0	0	0	0	1.10372	0	0
response to salicylic acid stimulus	GO:0009751	BnaC09g50990D	chrC09_random	AT5G65790	ATMYB68_MYB68	0	0	0	0	0	1.08659	0	0
response to salicylic acid stimulus	GO:0009751	BnaAnng11790D	chrAnn_random	AT3G50410	OBP1	0	0	0	0	0	0	1.07241	0
response to salicylic acid stimulus	GO:0009751	BnaC08g23660D	chrC08	AT3G52430	PAD4_ATPAD4	0	0	0.850344	0	0	0	0	0
response to salicylic acid stimulus	GO:0009751	BnaA09g32860D	chrA09	AT3G52430	PAD4_ATPAD4	0	0	0.806864	0	0	0	0	0
response to salicylic acid stimulus	GO:0009751	BnaA06g24760D	chrA06	AT5G65790	ATMYB68_MYB68	0	0	0	0	0	0	0.714728	0
response to salicylic acid stimulus	GO:0009751	BnaA06g37380D	chrA06	AT4G38620	ATMYB4_MYB4	0	0	0	0	0	1.06419	0	-1.04486
response to salicylic acid stimulus	GO:0009751	BnaA07g31550D	chrA07	AT1G74430	MYB95_ATMYB95_ATMYBCP66	0	0	0	0	1.57093	-1.60865	0	0
systemic acquired resistance	GO:0009627	BnaC03g45470D	chrC03	AT2G14610	PR1_PR_1_ATPR1	10.6084	11.6073	9.18338	11.0143	9.66446	10.6929	10.5592	10.047
systemic acquired resistance	GO:0009627	BnaA03g38630D	chrA03	AT2G14610	PR1_PR_1_ATPR1	9.27079	11.6958	8.72943	12.0372	10.0878	9.57518	11.7005	9.96616
systemic acquired resistance	GO:0009627	BnaC06g35810D	chrC06	AT1G75040	PR_5	6.8124	6.66165	6.38999	5.25342	5.89526	2.31454	7.87979	3.13282
systemic acquired resistance	GO:0009627	BnaA08g22130D	chrA08	AT1G19250	FMO1	5.49083	4.70638	4.01845	3.5791	6.14101	6.92535	4.56787	6.35261
systemic acquired resistance	GO:0009627	BnaCnng78360D	chrCnn_random	AT1G02450	NIMIN1_NIMIN_1	5.02731	5.08934	4.90071	4.61857	4.69231	3.81653	5.21375	4.38884
systemic acquired resistance	GO:0009627	BnaA09g51300D	chrA09	AT1G02450	NIMIN1_NIMIN_1	4.76713	4.93623	4.19424	4.09633	5.39514	4.07451	5.45071	4.51269
systemic acquired resistance	GO:0009627	BnaC08g18680D	chrC08	AT1G19250	FMO1	4.0225	3.03794	2.5112	2.47741	4.92824	5.3839	3.76074	6.00312
systemic acquired resistance	GO:0009627	BnaA03g53700D	chrA03	AT4G37150	ATMES9_MES9	3.57591	3.69606	3.97453	3.50278	3.32571	3.05202	4.03119	3.54709
systemic acquired resistance	GO:0009627	BnaA04g02490D	chrA04	AT3G57260	BGL2_PR2_BG2_PR_2	3.16606	3.6499	2.85025	3.08328	3.88698	2.19374	4.74545	3.5161
systemic acquired resistance	GO:0009627	BnaC03g33900D	chrC03	AT3G04720	PR4_HEL_PR_4	3.16191	2.15349	2.86556	2.26661	3.76437	3.00791	4.18324	3.3514
systemic acquired resistance	GO:0009627	BnaC01g01910D	chrC01	AT4G37150	ATMES9_MES9	3.18357	3.29289	2.15888	2.7355	3.68124	4.04158	2.51105	2.41274
systemic acquired resistance	GO:0009627	BnaA01g00900D	chrA01	AT4G37150	ATMES9_MES9	3.12215	2.98597	2.91234	2.84582	2.89954	2.93229	3.21763	3.03749
systemic acquired resistance	GO:0009627	BnaA03g28780D	chrA03	AT3G04720	PR4_HEL_PR_4	2.83428	2.30614	2.42378	1.63483	3.55701	2.65361	4.21525	3.56142
systemic acquired resistance	GO:0009627	BnaC07g46400D	chrC07	AT4G37150	ATMES9_MES9	2.64042	2.13271	2.67712	2.363	3.03475	2.54744	3.45254	2.91558
systemic acquired resistance	GO:0009627	BnaCnng77080D	chrCnn_random	AT1G19250	FMO1	2.83721	0	0	0	3.84906	6.57449	2.65045	5.2645
systemic acquired resistance	GO:0009627	BnaA10g01150D	chrA10	AT1G02450	NIMIN1_NIMIN_1	2.67581	2.33165	2.68436	2.24592	2.16728	3.06292	2.60598	2.26072
systemic acquired resistance	GO:0009627	BnaC06g35540D	chrC06	AT1G74710	EDS16_ICS1_SID2	2.67251	1.92709	2.6758	1.83053	2.58788	2.42551	2.26758	2.09803
systemic acquired resistance	GO:0009627	BnaC05g01240D	chrC05	AT1G02450	NIMIN1_NIMIN_1	2.24422	2.23346	2.29971	2.02122	1.92293	2.41146	1.94699	1.62665
systemic acquired resistance	GO:0009627	BnaC06g22820D	chrC06	AT1G74710	EDS16_ICS1_SID2	2.20504	1.65489	2.44392	1.64301	1.76356	1.77272	1.78807	1.92496
systemic acquired resistance	GO:0009627	BnaA07g22090D	chrA07	AT1G74710	EDS16_ICS1_SID2	2.3546	1.23674	2.62944	1.37035	1.78715	1.51949	1.91116	1.54548
systemic acquired resistance	GO:0009627	BnaCnng08300D	chrCnn_random	AT1G74710	EDS16_ICS1_SID2	1.41721	2.24158	1.42248	1.74955	1.14799	2.72534	1.15346	2.0748
systemic acquired resistance	GO:0009627	BnaA04g03090D	chrA04	AT3G57260	BGL2_PR2_BG2_PR_2	0	0	0	0	2.69936	0	3.56774	5.40539
systemic acquired resistance	GO:0009627	BnaC05g14910D	chrC05	AT1G19250	FMO1	2.69974	0	3.37436	0	3.78832	0	1.79593	0
systemic acquired resistance	GO:0009627	BnaC08g34420D	chrC08	AT2G23620	ATMES1_MES1	1.38866	0	1.77443	0.96714	1.40674	1.27499	1.95011	1.60774
systemic acquired resistance	GO:0009627	BnaA09g41920D	chrA09	AT2G23620	ATMES1_MES1	0	0	1.30674	0	1.3486	1.09349	1.84434	1.78157
systemic acquired resistance	GO:0009627	BnaC04g36040D	chrC04	AT2G23620	ATMES1_MES1	0	0	0	0	1.47363	0	0	0

## Sheet: N1 vs N8
Supplementary Table S3b: List of differentially expressed genes according to nitrate supply.
						Log2FC for the comparison between N1 and N8 (positive value are up regulated in N1)
GO_Term	GO_acc	BnaGenesID	Chr	AthGeneID	Description	HD018_eH_T14	Yudal_eH_T14	HD018_Ni_T14	Yudal_Ni_T14	HD018_eH_T27	Yudal_eH_T27	HD018_Ni_T27	Yudal_Ni_T27
ion transport	GO:0006811	BnaC09g22670D	chrC09	AT4G04640	ATPC1	2.15285	0	0	4.64916	0	0	3.49515	5.44657
ion transport	GO:0006811	BnaA03g41530D	chrA03	AT3G51895	SULTR3	1.9279	2.12387	1.81215	1.82771	1.07666	0	2.15333	1.49538
ion transport	GO:0006811	BnaA03g58530D	chrA03_random	AT4G21120	AAT1_CAT1	1.13037	1.57437	1.47431	1.84883	1.75934	1.6559	1.1935	1.35787
ion transport	GO:0006811	BnaC03g74280D	chrC03_random	AT3G24300	AMT1	2.36255	2.23882	2.00442	2.2058	0	1.46076	0	1.32476
ion transport	GO:0006811	BnaA03g37270D	chrA03	AT3G24300	AMT1	1.93209	2.1934	1.96843	1.92264	0	1.50121	0	1.30935
ion transport	GO:0006811	BnaA03g25540D	chrA03	AT4G04640	ATPC1	2.60051	0	0	0	0	0	3.56344	3.24701
ion transport	GO:0006811	BnaA09g30190D	chrA09	AT1G22990	HIPP22	0	1.2664	1.45762	1.07098	1.06996	1.12488	1.48881	1.30334
ion transport	GO:0006811	BnaC07g32580D	chrC07	AT3G51895	SULTR3	1.391	1.3318	1.56642	1.18733	0.8391	0	1.37899	0.967909
ion transport	GO:0006811	BnaA03g53230D	chrA03	AT2G17290	CPK6_ATCDPK3_ATCPK6	0	3.68998	0	0	0	2.97975	0	1.88156
ion transport	GO:0006811	BnaA10g06210D	chrA10	AT5G50200	WR3	2.68878	0	1.87447	0	1.3188	1.87735	0	0
ion transport	GO:0006811	BnaC09g01110D	chrC09	AT3G26570	PHT2	1.74884	0	0	0	2.029	2.11593	0	1.5661
ion transport	GO:0006811	BnaCnng14480D	chrCnn_random	AT5G49630	AAP6	0	1.0283	1.19539	1.64315	1.01887	0	0.954332	1.40559
ion transport	GO:0006811	BnaA05g30980D	chrA05	AT3G06370	NHX4_ATNHX4	0	0.911353	1.11301	1.24625	0	1.10118	1.13074	1.62275
ion transport	GO:0006811	BnaC03g00160D	chrC03	AT5G01600	ATFER1_FER1	0	0.981552	1.36536	1.20507	1.11801	0	1.35235	0.911924
ion transport	GO:0006811	BnaA03g00260D	chrA03	AT5G01600	ATFER1_FER1	0	1.40943	0	1.44588	0	1.74312	0.995638	1.08158
ion transport	GO:0006811	BnaC08g02430D	chrC08	AT1G08100	ACH2	1.19691	1.46842	0	1.75215	0	2.08113	0	0
ion transport	GO:0006811	BnaC03g29960D	chrC03	AT4G04640	ATPC1	0	2.32673	0	0	0	0	2.12775	2.01708
ion transport	GO:0006811	BnaC07g36580D	chrC07	AT4G21120	AAT1_CAT1	0	1.40831	0	1.60825	1.55459	1.62473	0	0
ion transport	GO:0006811	BnaC03g77720D	chrC03_random	AT1G51090	Heavy_metal_transport_detoxification_superfamily_protein_	0	1.78011	0	1.68853	1.39993	1.23759	0	0
ion transport	GO:0006811	BnaC02g30270D	chrC02	AT5G43370	APT1_PHT2_PHT1	0	0	0	0	0	3.79614	2.23382	0
ion transport	GO:0006811	BnaC06g19550D	chrC06	AT1G80830	NRAMP1_PMIT1_ATNRAMP1	0	0	1.60136	0	0	0	2.57952	1.80421
ion transport	GO:0006811	BnaA09g40790D	chrA09	AT2G25680	MOT1	0	0	1.05223	1.13597	0	1.02	1.01876	1.55153
ion transport	GO:0006811	BnaC05g45460D	chrC05	AT3G06370	NHX4_ATNHX4	0	0.87375	0.813998	0.970031	0	0.894287	0.985839	1.20482
ion transport	GO:0006811	BnaC08g27000D	chrC08	AT3G56090	ATFER3_FER3	0.665239	0	0.605061	0	1.64124	0.92689	1.00542	0.867928
ion transport	GO:0006811	BnaC04g44130D	chrC04	AT2G33770	UBC24_ATUBC24_PHO2	0.893014	0.875372	1.00224	1.07074	0	0	1.00998	0.854007
ion transport	GO:0006811	BnaAnng40490D	chrAnn_random	AT1G08100	ACH2	1.35659	1.14855	0	1.32448	0	1.79332	0	0
ion transport	GO:0006811	BnaA06g04560D	chrA06	AT1G08100	ACH2	1.20389	1.19592	0	1.37507	0	1.83572	0	0
ion transport	GO:0006811	BnaA05g35560D	chrA05_random	AT4G13510	AMT1	0.922698	1.02214	0.830258	1.06737	0.798728	0.869825	0	0
ion transport	GO:0006811	BnaC02g13180D	chrC02	AT5G55290	ATPase_V0_complex_subunit_E	0	2.02606	0	0	0	3.46671	0	0
ion transport	GO:0006811	BnaC03g27680D	chrC03	AT5G50200	WR3	0.863975	1.07853	0	1.10226	0.805974	1.59043	0	0
ion transport	GO:0006811	BnaA04g19750D	chrA04	AT2G33770	UBC24_ATUBC24_PHO2	1.02188	0.880088	1.19268	1.05473	0	0	1.01853	0
ion transport	GO:0006811	BnaA09g35550D	chrA09	AT3G56090	ATFER3_FER3	0	0	0	0.588731	1.73344	0.806081	0.962851	0.880245
ion transport	GO:0006811	BnaC06g11810D	chrC06	AT4G13510	AMT1	0.863764	1.03767	1.01264	1.22944	0	0.817115	0	0
ion transport	GO:0006811	BnaA07g16710D	chrA07	AT3G56090	ATFER3_FER3	0.75798	0	0	0	1.35643	0.924736	1.11076	0.713614
ion transport	GO:0006811	BnaA04g21850D	chrA04	AT2G38170	CAX1_ATCAX1_RCI4	0	0	0	0	1.04394	1.08221	1.14395	1.3205
ion transport	GO:0006811	BnaA09g52060D	chrA09_random	AT4G00900	ECA2_ATECA2	0	0	0	0	0	2.14611	0	1.98144
ion transport	GO:0006811	BnaA03g57010D	chrA03_random	AT5G50200	WR3	0.704758	0.93606	0	1.02007	0	1.28212	0	0
ion transport	GO:0006811	BnaC08g43370D	chrC08	AT1G08100	ACH2	1.68243	0	0	0	0	1.93548	0	0
ion transport	GO:0006811	BnaC06g15730D	chrC06	AT3G56090	ATFER3_FER3	0	0	0	0	1.34555	0.635571	0.746847	0.684653
ion transport	GO:0006811	BnaC08g09190D	chrC08	AT1G31260	ZIP10	0	1.35741	0	1.52644	0	0	0	0
ion transport	GO:0006811	BnaA08g07950D	chrA08	AT1G31260	ZIP10	0	0	2.85313	0	0	0	0	0
ion transport	GO:0006811	BnaC09g46440D	chrC09	AT5G10180	AST68_SULTR2	2.74368	0	0	0	0	0	0	0
ion transport	GO:0006811	BnaA07g20100D	chrA07	AT1G80830	NRAMP1_PMIT1_ATNRAMP1	0	0	0	0	1.31682	0	1.18182	0
ion transport	GO:0006811	BnaA09g49040D	chrA09	AT1G08100	ACH2	0	2.18194	0	0	0	0	0	0
ion transport	GO:0006811	BnaC02g16150D	chrC02	AT5G50200	WR3	0	0	0	0	0	2.08021	0	0
ion transport	GO:0006811	BnaA09g22560D	chrA09	AT4G10310	HKT1_ATHKT1	0	0	0	0	0	0	0	1.88717
ion transport	GO:0006811	BnaC09g24570D	chrC09	AT4G10310	HKT1_ATHKT1	0	0	0	0	0	0	0	1.82273
ion transport	GO:0006811	BnaA02g11760D	chrA02	AT5G50200	WR3	0	0	0	0	0	1.79862	0	0
ion transport	GO:0006811	BnaC08g43380D	chrC08	AT1G08100	ACH2	0	0	0	0	0	1.65884	0	0
ion transport	GO:0006811	BnaA09g35560D	chrA09	AT3G56090	ATFER3_FER3	0	0	0	0	1.00667	0.633937	0	0
ion transport	GO:0006811	BnaC09g26540D	chrC09	AT5G50200	WR3	0	0	0	0	0	1.57334	0	0
ion transport	GO:0006811	BnaA09g49050D	chrA09	AT1G08100	ACH2	0	0	0	0	0	1.50778	0	0
ion transport	GO:0006811	BnaC04g45720D	chrC04	AT2G38170	CAX1_ATCAX1_RCI4	0	0	0	0	0	0	0.655432	0.799901
ion transport	GO:0006811	BnaA03g58740D	chrA03_random	AT4G23700	ATCHX17_CHX17	0	0	0	0	0	1.39916	0	0
ion transport	GO:0006811	BnaA03g24340D	chrA03	AT4G10310	HKT1_ATHKT1	0	0	0	0	1.37892	0	0	0
ion transport	GO:0006811	BnaA08g02020D	chrA08	AT1G51090	Heavy_metal_transport_detoxification_superfamily_protein_	0	0	1.24767	0	0	0	0	0
ion transport	GO:0006811	BnaA07g05760D	chrA07	AT3G24300	AMT1	0	0	0	1.01707	0	0	0	0
ion transport	GO:0006811	BnaCnng11880D	chrCnn_random	AT1G60960	IRT3_ATIRT3	0	0	0	0	0	0.672947	0	0
ion transport	GO:0006811	BnaC04g07160D	chrC04	AT2G38170	CAX1_ATCAX1_RCI4	0	0.665755	0	0	0	0	0	0
ion transport	GO:0006811	BnaA02g36240D	chrA02_random	AT1G80830	NRAMP1_PMIT1_ATNRAMP1	0	0	0	0	0.515339	0	0	0
ion transport	GO:0006811	BnaC02g46600D	chrC02_random	AT1G80830	NRAMP1_PMIT1_ATNRAMP1	0	0	0	0	0.511174	0	0	0
ion transport	GO:0006811	BnaA10g12280D	chrA10	AT5G59040	COPT3	-0.738008	0	0	0	0	0	0	0
ion transport	GO:0006811	BnaA06g36740D	chrA06	AT5G43370	APT1_PHT2_PHT1	0	0	0	0	-0.807875	0	0	0
ion transport	GO:0006811	BnaC08g44730D	chrC08	AT1G06330	Heavy_metal_transport_detoxification_superfamily_protein_	0	0	0.994115	0	-1.8952	0	0	0
ion transport	GO:0006811	BnaA04g03160D	chrA04	AT3G56240	CCH	-0.939125	0	0	0	0	0	0	0
ion transport	GO:0006811	BnaA02g03610D	chrA02	AT5G17450	HIPP21	0	0	0	0	0	-1.21568	0	0
ion transport	GO:0006811	BnaA08g15080D	chrA08	AT4G23700	ATCHX17_CHX17	0	0	0	0	-1.25097	0	0	0
ion transport	GO:0006811	BnaA10g03460D	chrA10	AT1G05300	ZIP5	0	0	0	0	0	-1.26709	0	0
ion transport	GO:0006811	BnaC03g62130D	chrC03	AT4G23700	ATCHX17_CHX17	0	0	0	0	-1.2764	0	0	0
ion transport	GO:0006811	BnaC04g25100D	chrC04	AT3G56240	CCH	-1.38788	0	0	0	0	0	0	0
ion transport	GO:0006811	BnaC03g69030D	chrC03	AT1G05300	ZIP5	0	0	0	0	0	-1.54159	0	0
ion transport	GO:0006811	BnaA07g16800D	chrA07	AT3G56240	CCH	-0.778149	0	0	0	-0.853793	0	0	0
ion transport	GO:0006811	BnaC09g17510D	chrC09	AT5G43370	APT1_PHT2_PHT1	0	0	0	0	-1.67976	0	0	0
ion transport	GO:0006811	BnaC09g40460D	chrC09	AT5G17450	HIPP21	0	0	0	0	-1.08156	-1.03973	0	0
ion transport	GO:0006811	BnaA05g30010D	chrA05	AT3G07600	Heavy_metal_transport_detoxification_superfamily_protein_	0	0	0	0	-1.13144	-1.06945	0	0
ion transport	GO:0006811	BnaA10g17270D	chrA10	AT5G17450	HIPP21	0	0	0	0	-1.02754	-1.19286	0	0
ion transport	GO:0006811	BnaC02g09920D	chrC02	AT5G59520	ZIP2	0	0	0	0	-1.43813	0	-0.913432	0
ion transport	GO:0006811	BnaC08g42250D	chrC08	AT1G60960	IRT3_ATIRT3	0	0	-1.14194	0	0	-1.55351	0	0
ion transport	GO:0006811	BnaA09g47880D	chrA09	AT1G60960	IRT3_ATIRT3	0	0	-1.2356	0	0	-1.74315	0	0
ion transport	GO:0006811	BnaC03g35380D	chrC03	AT3G07600	Heavy_metal_transport_detoxification_superfamily_protein_	0	0	0	0	0	0	0	-2.99274
ion transport	GO:0006811	BnaA01g35020D	chrA01_random	AT4G19690	IRT1	-3.19966	0	0	0	0	0	0	0
ion transport	GO:0006811	BnaA01g23170D	chrA01	AT1G60960	IRT3_ATIRT3	0	0	0	0	0	0	-1.70073	-2.19909
ion transport	GO:0006811	BnaC02g44160D	chrC02_random	AT5G17450	HIPP21	0	0	0	0	-1.611	-2.42991	0	0
ion transport	GO:0006811	BnaC05g49110D	chrC05_random	AT1G05300	ZIP5	0	0	0	0	0	-1.86415	0	-2.28174
ion transport	GO:0006811	BnaA02g25550D	chrA02	AT5G47560	ATTDT_ATSDAT_TDT	0	-1.32864	-1.6875	0	0	0	0	-1.13355
ion transport	GO:0006811	BnaC01g28910D	chrC01	AT1G60960	IRT3_ATIRT3	-0.85435	0	-0.956422	0	-0.845978	-0.796615	-0.743582	0
ion transport	GO:0006811	BnaC02g33350D	chrC02	AT5G47560	ATTDT_ATSDAT_TDT	0	-1.25298	-2.01227	0	0	0	0	-1.19023
ion transport	GO:0006811	BnaA09g49970D	chrA09	AT1G06330	Heavy_metal_transport_detoxification_superfamily_protein_	0	0	0	0	-4.55813	0	0	0
ion transport	GO:0006811	BnaA03g12540D	chrA03	AT5G52730	Copper_transport_protein_family	0	-1.10947	-1.16742	-1.19939	0	-1.28552	0	0
ion transport	GO:0006811	BnaC09g06580D	chrC09	AT2G36950	Heavy_metal_transport_detoxification_superfamily_protein_	0	0	0	0	-1.6377	-1.67417	0	-1.77095
ion transport	GO:0006811	BnaA03g30100D	chrA03	AT3G07600	Heavy_metal_transport_detoxification_superfamily_protein_	0	0	0	0	-2.50222	0	0	-2.63345
ion transport	GO:0006811	BnaC05g24580D	chrC05	AT1G32450	NRT1_5	-1.13915	-0.836321	0	-1.0205	-1.36702	0	0	-1.16625
ion transport	GO:0006811	BnaC02g00440D	chrC02	AT5G10180	AST68_SULTR2	-1.56063	0	-1.30598	0	-1.13396	0	-1.91504	0
ion transport	GO:0006811	BnaAnng24890D	chrAnn_random	AT2G36950	Heavy_metal_transport_detoxification_superfamily_protein_	0	-1.0028	0	-0.968517	-1.08761	-1.49966	0	-1.51079
ion transport	GO:0006811	BnaC02g29240D	chrC02	AT4G10310	HKT1_ATHKT1	0	0	-1.40766	0	0	0	-2.77521	-1.94351
ion transport	GO:0006811	BnaA05g07480D	chrA05	AT2G36950	Heavy_metal_transport_detoxification_superfamily_protein_	0	-1.01467	0	-1.23435	-1.06067	-1.34013	0	-1.6459
ion transport	GO:0006811	BnaC03g43740D	chrC03	AT3G24450	Heavy_metal_transport_detoxification_superfamily_protein_	-2.64798	-1.27136	0	-1.51278	0	0	-1.21974	0
ion transport	GO:0006811	BnaC06g15850D	chrC06	AT3G56240	CCH	-1.55721	-0.754604	-0.693534	0	-1.99583	-1.05107	-0.905638	0
ion transport	GO:0006811	BnaC07g38420D	chrC07	AT4G23700	ATCHX17_CHX17	-1.95836	-1.53178	0	0	0	0	-2.22313	-1.26237
ion transport	GO:0006811	BnaA02g00420D	chrA02	AT5G10180	AST68_SULTR2	0	0	0	-1.36695	-1.70741	-1.08678	-1.32911	-1.62214
ion transport	GO:0006811	BnaC04g08310D	chrC04	AT2G36950	Heavy_metal_transport_detoxification_superfamily_protein_	0	-1.28534	0	-1.36832	-1.19525	-1.14073	-0.959599	-1.32723
ion transport	GO:0006811	BnaA01g03850D	chrA01	AT4G33020	ZIP9_ATZIP9	0	-2.39277	0	0	0	-5.16731	0	0
ion transport	GO:0006811	BnaA05g09470D	chrA05	AT2G34390	NIP2	0	0	0	0	0	0	0	-7.5992
ion transport	GO:0006811	BnaA02g00410D	chrA02	AT5G10180	AST68_SULTR2	0	-1.06141	0	-1.24313	-1.28197	-1.37087	-1.3414	-1.5213
ion transport	GO:0006811	BnaC01g05220D	chrC01	AT4G33020	ZIP9_ATZIP9	0	0	0	0	-3.29837	-2.61709	-1.98205	0
ion transport	GO:0006811	BnaC09g34470D	chrC09	AT5G59040	COPT3	-0.979859	-1.05436	-1.06401	-0.804092	-0.905288	-1.18324	-1.23655	-0.819669
ion transport	GO:0006811	BnaC09g20290D	chrC09	AT5G47560	ATTDT_ATSDAT_TDT	-2.62133	-1.46147	-2.60726	-1.37358	0	0	0	0
ion transport	GO:0006811	BnaCnng21180D	chrCnn_random	AT1G31260	ZIP10	0	0	0	0	-2.41227	-1.57462	-2.73313	-1.37345
ion transport	GO:0006811	BnaA02g07030D	chrA02	AT5G59520	ZIP2	-1.10277	0	-0.945948	0	-3.03341	-0.794922	-1.47338	-0.809168
ion transport	GO:0006811	BnaA09g16440D	chrA09	AT5G43370	APT1_PHT2_PHT1	-2.21674	0	-2.19595	0	-2.17338	0	-1.63853	0
ion transport	GO:0006811	BnaA04g21160D	chrA04	AT2G36950	Heavy_metal_transport_detoxification_superfamily_protein_	0	-1.49364	0	-1.50301	-1.89717	-1.19348	0	-2.1655
ion transport	GO:0006811	BnaC06g13300D	chrC06	AT5G40890	ATCLC_A_CLC_A_CLCA_ATCLCA	-1.35816	-1.26866	-1.27476	-1.20233	-1.18616	0	-1.0596	-1.29976
ion transport	GO:0006811	BnaA09g25300D	chrA09	AT1G31260	ZIP10	0	0	0	0	-2.74404	-2.19333	-2.59081	-1.50926
ion transport	GO:0006811	BnaC03g20420D	chrC03	AT2G36950	Heavy_metal_transport_detoxification_superfamily_protein_	-1.52561	-1.30795	0	-1.1965	-1.90372	-1.40627	0	-1.76849
ion transport	GO:0006811	BnaA05g35790D	chrA05_random	AT1G32450	NRT1_5	-1.70355	-1.29004	-1.22537	-1.37604	-1.32453	-1.00252	0	-1.18867
ion transport	GO:0006811	BnaA09g18360D	chrA09	AT5G47560	ATTDT_ATSDAT_TDT	-2.59665	-1.62546	-1.87472	-1.74754	0	0	-1.30489	0
ion transport	GO:0006811	BnaC05g28620D	chrC05	AT1G32450	NRT1_5	-2.12089	-1.55876	-1.40625	-1.5434	-1.54193	0	0	-1.38503
ion transport	GO:0006811	BnaC04g20690D	chrC04	AT3G63380	ATPase_E1_E2_type_family_protein___haloacid_dehalogenase_like_hydrolase_family_protein	0	0	-2.31539	0	0	0	-3.5272	-4.11002
ion transport	GO:0006811	BnaA06g35450D	chrA06	AT5G47560	ATTDT_ATSDAT_TDT	-2.59242	-2.66155	-2.77963	-2.04598	0	0	0	0
ion transport	GO:0006811	BnaAnng21660D	chrAnn_random	AT2G36950	Heavy_metal_transport_detoxification_superfamily_protein_	-0.91194	-1.42806	0	-1.40466	-1.83976	-1.44349	-1.104	-2.05485
ion transport	GO:0006811	BnaCnng46020D	chrCnn_random	AT4G19690	IRT1	-2.97873	0	0	0	-4.51353	-2.76145	0	0
ion transport	GO:0006811	BnaC08g27200D	chrC08	AT3G56240	CCH	-1.6923	-1.11577	-1.17316	-0.834527	-2.02076	-1.29576	-1.76169	-1.15769
ion transport	GO:0006811	BnaA05g10760D	chrA05	AT2G32270	ZIP3	-1.83953	0	-2.2763	0	-2.47141	-1.71864	-1.72933	-1.33153
ion transport	GO:0006811	BnaC04g10830D	chrC04	AT2G34390	NIP2	0	0	0	0	-3.49321	0	-3.33669	-4.56107
ion transport	GO:0006811	BnaCnng37060D	chrCnn_random	AT5G43370	APT1_PHT2_PHT1	-2.96924	0	-2.64581	0	-3.4728	0	-2.68012	0
ion transport	GO:0006811	BnaC04g10820D	chrC04	AT2G34390	NIP2	0	-3.005	0	0	0	0	-2.99839	-5.95027
ion transport	GO:0006811	BnaA09g24330D	chrA09	AT1G32450	NRT1_5	-1.7237	-1.42928	-1.19568	-1.60935	-2.09311	-1.27082	-1.14292	-1.85191
ion transport	GO:0006811	BnaA03g16900D	chrA03	AT2G36950	Heavy_metal_transport_detoxification_superfamily_protein_	-2.15272	-1.59822	-1.93618	-1.26861	-1.4911	-0.973539	-1.3388	-1.79548
ion transport	GO:0006811	BnaA06g17790D	chrA06	AT3G46900	COPT2	-1.79408	-1.32834	-1.69655	-1.54211	-2.5341	0	-2.30086	-1.43206
ion transport	GO:0006811	BnaC01g24930D	chrC01	AT3G46900	COPT2	-1.35669	-1.1742	-1.05955	-1.3444	-2.88946	-1.51894	-2.12821	-1.63662
ion transport	GO:0006811	BnaA07g15180D	chrA07	AT5G40890	ATCLC_A_CLC_A_CLCA_ATCLCA	-1.66207	-1.76878	-1.65549	-1.61316	-1.8246	-0.836951	-1.84729	-2.04031
ion transport	GO:0006811	BnaAnng38380D	chrAnn_random	AT3G56240	CCH	-2.00659	-1.39298	-1.55553	-1.19381	-2.60828	-1.65624	-2.15874	-1.6195
ion transport	GO:0006811	BnaC04g12510D	chrC04	AT2G32270	ZIP3	-2.17807	0	-2.12219	0	-3.77053	-2.38364	-2.52431	-1.46125
ion transport	GO:0006811	BnaA05g09450D	chrA05	AT2G34390	NIP2	0	0	0	0	-3.43956	0	-4.25397	-7.00185
ion transport	GO:0006811	BnaC08g49220D	chrC08_random	AT4G37270	HMA1_ATHMA1	-2.52036	-2.98748	-2.85774	0	-2.14494	-4.69373	0	0
ion transport	GO:0006811	BnaC03g33190D	chrC03	AT3G02850	SKOR	-2.53369	-2.17622	-1.92689	-2.41405	-2.85406	0	-2.5608	-2.83118
ion transport	GO:0006811	BnaCnng70180D	chrCnn_random	AT5G24380	YSL2_ATYSL2	-2.35773	-1.99539	-2.23436	-1.69813	-2.94831	-1.57399	-2.62093	-2.08802
ion transport	GO:0006811	BnaCnng25960D	chrCnn_random	AT3G46900	COPT2	-2.1931	-2.0402	-2.36269	-1.76239	-3.02564	-1.44999	-2.99678	-2.01227
ion transport	GO:0006811	BnaC06g01530D	chrC06	AT3G46900	COPT2	-2.21242	-2.04024	-2.36025	-1.7624	-3.02568	-1.44999	-2.99679	-2.01227
ion transport	GO:0006811	BnaC07g30050D	chrC07	AT5G24380	YSL2_ATYSL2	-2.50467	-2.23074	-2.16816	-1.81417	-3.24484	-1.75685	-2.46475	-1.99119
ion transport	GO:0006811	BnaA02g22130D	chrA02	AT4G10310	HKT1_ATHKT1	-3.84512	-1.80206	-1.49616	0	-5.10743	0	-4.03108	-3.12034
ion transport	GO:0006811	BnaA03g28160D	chrA03	AT3G02850	SKOR	-2.60272	-2.37756	-1.7101	-2.6331	-3.68546	0	-3.31777	-3.77198
ion transport	GO:0006811	BnaCnng67060D	chrCnn_random	AT4G19690	IRT1	-3.88358	-2.94685	-3.07197	-2.29058	-5.14526	-3.75403	0	-2.65546
regulation of nitrogen compound metabolic process	GO:0051171	BnaA08g15280D	chrA08	AT4G36570	ATRL3	2.27547	1.45384	2.87893	2.04859	1.37012	0	3.01538	1.62338
regulation of nitrogen compound metabolic process	GO:0051171	BnaAnng02740D	chrAnn_random	AT3G05690	UNE8_ATHAP2B_HAP2B_NF_YA2	2.38816	1.82617	2.20558	1.62821	2.10458	1.62122	1.56375	0
regulation of nitrogen compound metabolic process	GO:0051171	BnaC07g45500D	chrC07	AT4G35270	Plant_regulator_RWP_RK_family_protein	2.07638	2.02127	1.43321	1.92208	1.24293	1.97149	1.11374	1.09845
regulation of nitrogen compound metabolic process	GO:0051171	BnaA01g29650D	chrA01	AT3G14020	NF_YA6	1.82306	2.35373	1.87552	1.50572	1.70328	1.12575	1.14035	1.32011
regulation of nitrogen compound metabolic process	GO:0051171	BnaA07g38140D	chrA07_random	AT3G61630	CRF6	1.29702	1.72875	1.80643	1.55102	1.94508	1.23073	1.35266	1.22197
regulation of nitrogen compound metabolic process	GO:0051171	BnaC03g25810D	chrC03	AT2G46410	CPC	1.79027	1.9713	1.32886	1.7109	1.48524	1.84767	1.01784	0
regulation of nitrogen compound metabolic process	GO:0051171	BnaC03g24230D	chrC03	AT2G43500	Plant_regulator_RWP_RK_family_protein	1.37516	1.8003	1.73402	1.52055	1.45237	0	1.17668	1.23743
regulation of nitrogen compound metabolic process	GO:0051171	BnaC06g42850D	chrC06_random	AT3G61630	CRF6	1.46702	1.47289	1.42879	1.46368	1.38622	1.26864	0.924506	0
regulation of nitrogen compound metabolic process	GO:0051171	BnaC04g02980D	chrC04	AT2G43500	Plant_regulator_RWP_RK_family_protein	1.08032	1.41226	1.12912	1.46799	1.01718	1.02775	1.01872	1.1881
regulation of nitrogen compound metabolic process	GO:0051171	BnaC04g34610D	chrC04	AT2G22200	Integrase_type_DNA_binding_superfamily_protein	2.02601	1.80806	0	1.61065	1.57753	2.20414	0	0
regulation of nitrogen compound metabolic process	GO:0051171	BnaC01g37260D	chrC01	AT3G14020	NF_YA6	1.65947	1.88103	1.71468	1.46046	1.32511	0	0	1.07929
regulation of nitrogen compound metabolic process	GO:0051171	BnaC02g15420D	chrC02	AT5G52020	Integrase_type_DNA_binding_superfamily_protein	0	5.24155	0	0	0	3.82473	0	0
regulation of nitrogen compound metabolic process	GO:0051171	BnaA08g26690D	chrA08	AT1G08970	HAP5C_NF_YC9	1.14361	1.18486	1.0548	0.91801	0.716864	0.95259	1.61222	1.36319
regulation of nitrogen compound metabolic process	GO:0051171	BnaCnng05440D	chrCnn_random	AT2G33550	Homeodomain_like_superfamily_protein	1.62704	1.30182	0.841204	1.42152	0.982315	1.75228	0.995323	0
regulation of nitrogen compound metabolic process	GO:0051171	BnaA02g17180D	chrA02	AT1G75390	AtbZIP44_bZIP44	1.30923	1.32374	2.11833	1.60421	0	0	1.57543	0.884078
regulation of nitrogen compound metabolic process	GO:0051171	BnaCnng31430D	chrCnn_random	AT3G21270	ADOF2_DOF2	1.64881	1.22442	0	1.57882	0	1.43612	1.24242	1.55811
regulation of nitrogen compound metabolic process	GO:0051171	BnaA03g21400D	chrA03	AT2G46410	CPC	1.57369	1.34425	1.08508	1.13361	1.18169	1.45684	0	0.851523
regulation of nitrogen compound metabolic process	GO:0051171	BnaA05g03380D	chrA05	AT2G43500	Plant_regulator_RWP_RK_family_protein	1.4334	1.12335	1.56075	1.27553	1.12618	0	1.06821	1.01523
regulation of nitrogen compound metabolic process	GO:0051171	BnaA03g52990D	chrA03	AT4G34680	GATA3	1.12277	1.51711	1.07617	1.12548	0	1.29627	1.22972	1.20415
regulation of nitrogen compound metabolic process	GO:0051171	BnaA02g11090D	chrA02	AT5G52020	Integrase_type_DNA_binding_superfamily_protein	1.09584	1.32386	0.861689	0.991253	1.21244	1.12649	0.846056	0.878644
regulation of nitrogen compound metabolic process	GO:0051171	BnaC07g25900D	chrC07	AT2G33550	Homeodomain_like_superfamily_protein	1.63049	1.19377	0	1.06196	1.16486	1.94756	1.17626	0
regulation of nitrogen compound metabolic process	GO:0051171	BnaA02g11100D	chrA02	AT5G52020	Integrase_type_DNA_binding_superfamily_protein	1.30286	1.20094	0.927915	1.07706	1.39974	1.08735	0	1.16641
regulation of nitrogen compound metabolic process	GO:0051171	BnaA01g11580D	chrA01	AT4G21750	ATML1	0	0	1.85549	0	0	3.326	0	2.49472
regulation of nitrogen compound metabolic process	GO:0051171	BnaC06g06950D	chrC06	AT3G14020	NF_YA6	1.31413	1.05979	1.26462	0.794739	0	0.783368	1.45659	0.956322
regulation of nitrogen compound metabolic process	GO:0051171	BnaA06g01280D	chrA06	AT3G14020	NF_YA6	1.44056	1.19495	1.07278	0.855821	0.597278	0.710906	1.02681	0.691394
regulation of nitrogen compound metabolic process	GO:0051171	BnaA08g28100D	chrA08	AT1G04880	HMG_	1.70574	1.56104	1.62673	1.42145	0	1.27502	0	0
regulation of nitrogen compound metabolic process	GO:0051171	BnaA03g34610D	chrA03	AT3G17609	HYH	1.42637	1.43966	1.86734	1.06536	0	0	1.63325	0
regulation of nitrogen compound metabolic process	GO:0051171	BnaA06g40940D	chrA06_random	AT4G38340	Plant_regulator_RWP_RK_family_protein	1.46936	1.36713	0.862229	1.21396	0.803779	1.50282	0	0
regulation of nitrogen compound metabolic process	GO:0051171	BnaA03g20260D	chrA03	AT2G43500	Plant_regulator_RWP_RK_family_protein	1.05956	1.06103	1.13953	1.02749	0.807247	0	1.13831	0.954859
regulation of nitrogen compound metabolic process	GO:0051171	BnaC03g68600D	chrC03	AT1G50420	SCL3_SCL_3	1.0277	1.03326	0.869724	1.20427	0.593387	0.798569	0.617496	1.03103
regulation of nitrogen compound metabolic process	GO:0051171	BnaC03g14960D	chrC03	AT5G53290	CRF3	1.77692	1.13409	0	1.18291	1.34133	1.73353	0	0
regulation of nitrogen compound metabolic process	GO:0051171	BnaA03g35980D	chrA03	AT3G20910	NF_YA9	1.0019	1.1366	0.996485	0.805278	1.16463	0	1.06778	0.987472
regulation of nitrogen compound metabolic process	GO:0051171	BnaC02g25060D	chrC02	AT1G78600	LZF1	1.2658	0.902854	0	1.13571	1.03113	1.48251	1.15714	0
regulation of nitrogen compound metabolic process	GO:0051171	BnaC02g01260D	chrC02	AT5G08190	NF_YB12	0	0	0	0	0	6.81125	0	0
regulation of nitrogen compound metabolic process	GO:0051171	BnaA10g27100D	chrA10	AT5G02460	Dof_type_zinc_finger_DNA_binding_family_protein	1.73898	0	0.996049	1.2186	0	1.68707	1.02385	0
regulation of nitrogen compound metabolic process	GO:0051171	BnaA10g25470D	chrA10	AT5G04840	bZIP_protein	1.14507	1.10901	1.06267	1.01781	0.652717	0.976836	0	0.6593
regulation of nitrogen compound metabolic process	GO:0051171	BnaCnng06510D	chrCnn_random	AT1G08970	HAP5C_NF_YC9	0	0	1.21597	0	0	1.56937	2.32721	1.47331
regulation of nitrogen compound metabolic process	GO:0051171	BnaC09g50830D	chrC09	AT5G04840	bZIP_protein	1.10119	1.04097	0.912189	0.968875	0.672964	0.941875	0	0.629821
regulation of nitrogen compound metabolic process	GO:0051171	BnaC04g25110D	chrC04	AT3G56220	transcription_regulators	2.4419	3.43371	2.65634	0	0	-2.31475	0	0
regulation of nitrogen compound metabolic process	GO:0051171	BnaC07g21780D	chrC07	AT2G02470	AL6	1.1493	0	0	0	1.10362	1.49386	1.2458	0.998487
regulation of nitrogen compound metabolic process	GO:0051171	BnaC08g30700D	chrC08	AT3G60490	Integrase_type_DNA_binding_superfamily_protein	0.722652	0.812824	0.855268	0.870717	0.745859	0	1.02122	0.892751
regulation of nitrogen compound metabolic process	GO:0051171	BnaC04g43950D	chrC04	AT2G33550	Homeodomain_like_superfamily_protein	1.10613	0.883721	0.813957	0.819281	0.717038	0.928418	0.585067	0
regulation of nitrogen compound metabolic process	GO:0051171	BnaA09g54180D	chrA09_random	AT1G29160	Dof_type_zinc_finger_DNA_binding_family_protein	0	0	0	0	0	5.81877	0	0
regulation of nitrogen compound metabolic process	GO:0051171	BnaC02g03060D	chrC02	AT5G03510	C2H2_type_zinc_finger_family_protein	0	0	0	0	0	5.67467	0	0
regulation of nitrogen compound metabolic process	GO:0051171	BnaA05g21160D	chrA05	AT3G18960	AP2_B3_like_transcriptional_factor_family_protein	0.89781	0.695497	0.73845	0	0.718929	0	1.24771	1.13357
regulation of nitrogen compound metabolic process	GO:0051171	BnaC02g01680D	chrC02	AT5G07310	Integrase_type_DNA_binding_superfamily_protein	0	5.38916	0	0	0	0	0	0
regulation of nitrogen compound metabolic process	GO:0051171	BnaA04g19580D	chrA04	AT2G33550	Homeodomain_like_superfamily_protein	1.18822	0.982976	0	0.758547	1.00831	1.36909	0	0
regulation of nitrogen compound metabolic process	GO:0051171	BnaA05g09110D	chrA05	AT2G34720	NF_YA4	0	0.903864	0.847783	0.778808	0	0.732624	0.96325	1.05521
regulation of nitrogen compound metabolic process	GO:0051171	BnaC02g14430D	chrC02	AT5G53290	CRF3	0.991259	0.924033	0.702674	1.029	0	0.864505	0.659612	0
regulation of nitrogen compound metabolic process	GO:0051171	BnaAnng31560D	chrAnn_random	AT1G54160	NFYA5_NF_YA5	1.36529	1.21062	1.24378	1.29954	0	0	0	0
regulation of nitrogen compound metabolic process	GO:0051171	BnaA06g13050D	chrA06	AT1G18860	WRKY61_ATWRKY61	1.31785	1.19463	0	0.871577	0	1.52006	0	0
regulation of nitrogen compound metabolic process	GO:0051171	BnaA08g02160D	chrA08	AT1G50420	SCL3_SCL_3	1.23612	0.820595	1.1395	0	0	0	0.960948	0.73238
regulation of nitrogen compound metabolic process	GO:0051171	BnaC09g28200D	chrC09	AT5G52020	Integrase_type_DNA_binding_superfamily_protein	0	1.03331	0.908437	0	1.12426	0.849296	0	0.909004
regulation of nitrogen compound metabolic process	GO:0051171	BnaA02g06040D	chrA02	AT5G22890	C2H2_and_C2HC_zinc_fingers_superfamily_protein	0	1.16328	0	1.29297	0	2.33178	0	0
regulation of nitrogen compound metabolic process	GO:0051171	BnaA07g37160D	chrA07_random	AT1G25440	B_box_type_zinc_finger_protein_with_CCT_domain	2.50091	0	2.28086	0	0	0	0	0
regulation of nitrogen compound metabolic process	GO:0051171	BnaC06g33980D	chrC06	AT1G72830	HAP2C_ATHAP2C_NF_YA3	1.04482	1.03646	1.08647	0.816903	0	0	0.686225	0
regulation of nitrogen compound metabolic process	GO:0051171	BnaA02g27940D	chrA02	AT5G54680	ILR3_bHLH105	0	1.88778	0	1.02773	0	1.70164	0	0
regulation of nitrogen compound metabolic process	GO:0051171	BnaA03g53210D	chrA03	AT4G35270	Plant_regulator_RWP_RK_family_protein	1.29644	1.09351	0	1.05367	0	1.15216	0	0
regulation of nitrogen compound metabolic process	GO:0051171	BnaA09g05400D	chrA09	AT5G23280	TCP_family_transcription_factor_	0	0.653568	0.624431	0.56213	0.817421	0.651641	0.694805	0.58583
regulation of nitrogen compound metabolic process	GO:0051171	BnaA05g06600D	chrA05	AT2G38090	Duplicated_homeodomain_like_superfamily_protein	0	0	0	0	1.3527	1.20954	1.10327	0.88848
regulation of nitrogen compound metabolic process	GO:0051171	BnaC09g46360D	chrC09	AT5G10280	MYB92_ATMYB92_ATMYB64	0	0	1.02049	0	0	0.765681	1.57767	1.07297
regulation of nitrogen compound metabolic process	GO:0051171	BnaC09g33360D	chrC09	AT5G56840	myb_like_transcription_factor_family_protein	1.61109	1.3742	0	1.37113	0	0	0	0
regulation of nitrogen compound metabolic process	GO:0051171	BnaA08g11080D	chrA08	AT4G34590	ATB2_GBF6_AtbZIP11_BZIP11	0	0.987848	0	1.09846	0	0.969045	0	1.28746
regulation of nitrogen compound metabolic process	GO:0051171	BnaA10g27820D	chrA10_random	AT1G44830	Integrase_type_DNA_binding_superfamily_protein	0	1.02787	1.09397	1.20667	0	0	0	0.933406
regulation of nitrogen compound metabolic process	GO:0051171	BnaA10g10930D	chrA10	AT5G56840	myb_like_transcription_factor_family_protein	1.43598	1.57548	0	0	0	1.249	0	0
regulation of nitrogen compound metabolic process	GO:0051171	BnaA06g05230D	chrA06	AT1G08970	HAP5C_NF_YC9	0	0.905431	0.888554	0.834964	0	0	0.807364	0.787268
regulation of nitrogen compound metabolic process	GO:0051171	BnaA04g12700D	chrA04	AT2G22200	Integrase_type_DNA_binding_superfamily_protein	0	1.30933	0	1.25008	0	1.64546	0	0
regulation of nitrogen compound metabolic process	GO:0051171	BnaA01g02480D	chrA01	AT4G34680	GATA3	1.05918	0.848983	0.935848	0.702869	0	0	0.628201	0
regulation of nitrogen compound metabolic process	GO:0051171	BnaA10g03490D	chrA10	AT1G05710	basic_helix_loop_helix_	0	0.9132	0	0.93956	0	0	0.889662	1.40578
regulation of nitrogen compound metabolic process	GO:0051171	BnaC09g05560D	chrC09	AT5G62260	AT_hook_motif_DNA_binding_family_protein	0.757105	0	0	0	0.685496	1.23583	0.602265	0.807462
regulation of nitrogen compound metabolic process	GO:0051171	BnaA04g25110D	chrA04	AT2G43500	Plant_regulator_RWP_RK_family_protein	0.972701	1.14695	1.01361	0.889974	0	0	0	0
regulation of nitrogen compound metabolic process	GO:0051171	BnaCnng68450D	chrCnn_random	AT1G72830	HAP2C_ATHAP2C_NF_YA3	0.871673	0.847143	0.889845	0.673348	0	0	0.709425	0
regulation of nitrogen compound metabolic process	GO:0051171	BnaA07g30460D	chrA07	AT1G72830	HAP2C_ATHAP2C_NF_YA3	0.880025	0.779195	0.883083	0.728269	0	0	0.71882	0
regulation of nitrogen compound metabolic process	GO:0051171	BnaC01g03740D	chrC01	AT4G34680	GATA3	0.817692	0.728138	0.560663	0.667072	0	0.625817	0.547967	0
regulation of nitrogen compound metabolic process	GO:0051171	BnaA02g16180D	chrA02	AT1G72830	HAP2C_ATHAP2C_NF_YA3	0.776919	0.850398	0.753815	0.761367	0	0	0.57553	0
regulation of nitrogen compound metabolic process	GO:0051171	BnaC06g22430D	chrC06	AT1G75390	AtbZIP44_bZIP44	0	0	0.818275	0.88724	0	0	0.853049	0.958488
regulation of nitrogen compound metabolic process	GO:0051171	BnaA05g22650D	chrA05	AT3G17609	HYH	0	0	0	0	0	1.8099	1.49376	0
regulation of nitrogen compound metabolic process	GO:0051171	BnaC05g06520D	chrC05	AT1G08970	HAP5C_NF_YC9	0	0.825045	0.735252	0	0	0	0.807365	0.860805
regulation of nitrogen compound metabolic process	GO:0051171	BnaA05g10030D	chrA05	AT2G33550	Homeodomain_like_superfamily_protein	1.14481	0.845225	0	0	0	1.22527	0	0
regulation of nitrogen compound metabolic process	GO:0051171	BnaCnng28850D	chrCnn_random	AT5G02460	Dof_type_zinc_finger_DNA_binding_family_protein	0	3.05683	0	0	0	0	0	0
regulation of nitrogen compound metabolic process	GO:0051171	BnaA10g07620D	chrA10	AT5G52020	Integrase_type_DNA_binding_superfamily_protein	0	0.894369	0	0	1.23836	0.898852	0	0
regulation of nitrogen compound metabolic process	GO:0051171	BnaA03g12320D	chrA03	AT5G53290	CRF3	1.50082	0	0	0	0	1.43873	0	0
regulation of nitrogen compound metabolic process	GO:0051171	BnaC04g10470D	chrC04	AT2G34720	NF_YA4	0	0.744327	0.647201	0	0	0	0.687989	0.799547
regulation of nitrogen compound metabolic process	GO:0051171	BnaCnng69430D	chrCnn_random	AT5G02460	Dof_type_zinc_finger_DNA_binding_family_protein	0	0	0	1.0534	0	0	0.903477	0.897717
regulation of nitrogen compound metabolic process	GO:0051171	BnaA08g00840D	chrA08	AT1G54160	NFYA5_NF_YA5	0	0	0.875232	0	0	0	0.996386	0.770839
regulation of nitrogen compound metabolic process	GO:0051171	BnaA09g39350D	chrA09	AT3G61630	CRF6	0	0	0	0	0	1.47027	1.12353	0
regulation of nitrogen compound metabolic process	GO:0051171	BnaA09g05970D	chrA09	AT5G62260	AT_hook_motif_DNA_binding_family_protein	0.643811	0.539192	0.530278	0	0	0.781776	0	0
regulation of nitrogen compound metabolic process	GO:0051171	BnaC01g02200D	chrC01	AT4G36570	ATRL3	0	0	1.46906	0	0	-0.959939	1.91817	0
regulation of nitrogen compound metabolic process	GO:0051171	BnaA06g34120D	chrA06	AT2G02470	AL6	1.04742	0	0	0	0	0	0	1.20843
regulation of nitrogen compound metabolic process	GO:0051171	BnaA10g13430D	chrA10	AT4G34590	ATB2_GBF6_AtbZIP11_BZIP11	0	0	0	0	0	0	1.14503	1.07829
regulation of nitrogen compound metabolic process	GO:0051171	BnaA03g29140D	chrA03	AT3G05690	UNE8_ATHAP2B_HAP2B_NF_YA2	1.02423	1.10761	0	0	0	0	0	0
regulation of nitrogen compound metabolic process	GO:0051171	BnaC03g65930D	chrC03	AT4G34590	ATB2_GBF6_AtbZIP11_BZIP11	0	0	0	0	0	0	1.04069	1.06789
regulation of nitrogen compound metabolic process	GO:0051171	BnaCnng43450D	chrCnn_random	AT2G38090	Duplicated_homeodomain_like_superfamily_protein	0	0	0	0	1.01936	0	0	0.98635
regulation of nitrogen compound metabolic process	GO:0051171	BnaC07g09150D	chrC07	AT5G22890	C2H2_and_C2HC_zinc_fingers_superfamily_protein	0	0	0	0	0	1.99156	0	0
regulation of nitrogen compound metabolic process	GO:0051171	BnaA04g16510D	chrA04	AT5G22890	C2H2_and_C2HC_zinc_fingers_superfamily_protein	0	0	0	0	0	1.98909	0	0
regulation of nitrogen compound metabolic process	GO:0051171	BnaA04g08840D	chrA04	AT5G22890	C2H2_and_C2HC_zinc_fingers_superfamily_protein	0	0	0	0	0	1.98909	0	0
regulation of nitrogen compound metabolic process	GO:0051171	BnaA07g21710D	chrA07	AT1G75390	AtbZIP44_bZIP44	0	0.763087	0	0	0	0	0	0.811885
regulation of nitrogen compound metabolic process	GO:0051171	BnaC02g41680D	chrC02	AT5G23280	TCP_family_transcription_factor_	0	0	0	0	0	0	0	1.29334
regulation of nitrogen compound metabolic process	GO:0051171	BnaA05g36740D	chrA05_random	AT3G21270	ADOF2_DOF2	0	0	0	0	0	0	0	1.17916
regulation of nitrogen compound metabolic process	GO:0051171	BnaC09g21010D	chrC09	AT2G02470	AL6	0	0	0	0	0	0	0.626505	0.532347
regulation of nitrogen compound metabolic process	GO:0051171	BnaA03g17580D	chrA03	AT2G38090	Duplicated_homeodomain_like_superfamily_protein	0	0	0	0	0	0	0	1.14696
regulation of nitrogen compound metabolic process	GO:0051171	BnaA09g44440D	chrA09	AT1G18860	WRKY61_ATWRKY61	0	0	0	0	0	1.10416	0	0
regulation of nitrogen compound metabolic process	GO:0051171	BnaC01g03280D	chrC01	AT4G35270	Plant_regulator_RWP_RK_family_protein	0	0	0	0	0	1.07969	0	0
regulation of nitrogen compound metabolic process	GO:0051171	BnaC05g03860D	chrC05	AT1G05710	basic_helix_loop_helix_	0	0	0	0	0	0	0	1.05158
regulation of nitrogen compound metabolic process	GO:0051171	BnaC02g21570D	chrC02	AT1G72830	HAP2C_ATHAP2C_NF_YA3	0	0.545262	0	0.502951	0	0	0	0
regulation of nitrogen compound metabolic process	GO:0051171	BnaC05g19190D	chrC05	AT3G05690	UNE8_ATHAP2B_HAP2B_NF_YA2	0	1.03485	0	0	0	0	0	0
regulation of nitrogen compound metabolic process	GO:0051171	BnaA02g10340D	chrA02	AT5G53290	CRF3	0	0	0	0	0	0.943374	0	0
regulation of nitrogen compound metabolic process	GO:0051171	BnaCnng38100D	chrCnn_random	AT5G53290	CRF3	0	0	0	0.906609	0	0	0	0
regulation of nitrogen compound metabolic process	GO:0051171	BnaC03g65270D	chrC03	AT4G35270	Plant_regulator_RWP_RK_family_protein	0.861298	0	0	0	0	0	0	0
regulation of nitrogen compound metabolic process	GO:0051171	BnaA10g21970D	chrA10	AT5G10280	MYB92_ATMYB92_ATMYB64	0	0	0	0	0	0	0.824291	0
regulation of nitrogen compound metabolic process	GO:0051171	BnaA04g21820D	chrA04	AT2G38090	Duplicated_homeodomain_like_superfamily_protein	0	0	0	0	0	0	0	0.704359
regulation of nitrogen compound metabolic process	GO:0051171	BnaC06g00880D	chrC06	AT1G44830	Integrase_type_DNA_binding_superfamily_protein	0	0	0.843436	0	0.84073	-0.989789	0	0
regulation of nitrogen compound metabolic process	GO:0051171	BnaA06g21720D	chrA06	AT5G62260	AT_hook_motif_DNA_binding_family_protein	0	0	0	0	0	0.610374	0	0
regulation of nitrogen compound metabolic process	GO:0051171	BnaA05g19990D	chrA05	AT3G20910	NF_YA9	0	0	0	0	0	0	0.580341	0
regulation of nitrogen compound metabolic process	GO:0051171	BnaC02g42220D	chrC02	AT5G23280	TCP_family_transcription_factor_	0	0.575515	0	0	0	0	0	0
regulation of nitrogen compound metabolic process	GO:0051171	BnaA09g19080D	chrA09	AT2G02470	AL6	0	0	0	0	0	0	0	0.570834
regulation of nitrogen compound metabolic process	GO:0051171	BnaC09g31010D	chrC09	AT5G54680	ILR3_bHLH105	0	0.534208	0	0	0	0	0	0
regulation of nitrogen compound metabolic process	GO:0051171	BnaA03g52920D	chrA03	AT4G34590	ATB2_GBF6_AtbZIP11_BZIP11	0	0	0	0	0	0.523352	0	0
regulation of nitrogen compound metabolic process	GO:0051171	BnaC05g31370D	chrC05	AT3G20910	NF_YA9	0	0.50801	0	0	0	0	0	0
regulation of primary metabolic process	GO:0080090	BnaC03g65200D	chrC03	AT4G23550	WRKY29_ATWRKY29	0	0	0	0	0	1.80689	0	-1.67254
regulation of primary metabolic process	GO:0080090	BnaC06g30480D	chrC06	AT1G69310	WRKY57_ATWRKY57	0	0	0	0.669982	0	0	0	-0.609266
regulation of primary metabolic process	GO:0080090	BnaC01g39340D	chrC01	AT3G08730	ATPK1_ATPK6_ATS6K1_PK6_PK1_S6K1	0	0	0	0	0	0	0	-0.536997
regulation of primary metabolic process	GO:0080090	BnaA01g32290D	chrA01	AT3G08730	ATPK1_ATPK6_ATS6K1_PK6_PK1_S6K1	0	0	0	0	0	0	0	-0.57169
regulation of primary metabolic process	GO:0080090	BnaC01g37430D	chrC01	AT3G13810	IDD11	0	0	0	0	0	-0.582478	0	0
regulation of primary metabolic process	GO:0080090	BnaC05g15280D	chrC05	AT1G19700	BEL10_BLH10	0	-0.751345	0	0	0	0	0	0
regulation of primary metabolic process	GO:0080090	BnaC09g32700D	chrC09	AT5G57620	MYB36_AtMYB36	-0.842726	0	0	0	0	0	0	0
regulation of primary metabolic process	GO:0080090	BnaA03g10180D	chrA03	AT5G57620	MYB36_AtMYB36	0	0	0	0	-0.915537	0	0	0
regulation of primary metabolic process	GO:0080090	BnaC09g36400D	chrC09	AT5G22570	WRKY38_ATWRKY38	0	0	-0.9239	0	0	0	0	0
regulation of primary metabolic process	GO:0080090	BnaA01g05500D	chrA01	AT4G39410	WRKY13_ATWRKY13	-1.00634	0	0	0	0	0	0	0
regulation of primary metabolic process	GO:0080090	BnaC02g02300D	chrC02	AT5G05410	DREB2A_DREB2	-1.01295	0	0	0	0	0	0	0
regulation of primary metabolic process	GO:0080090	BnaA09g48450D	chrA09	AT1G09530	PIF3_POC1_PAP3	0	0	0	0	0	-1.02828	0	0
regulation of primary metabolic process	GO:0080090	BnaA01g37250D	chrA01_random	AT3G13810	IDD11	0	0	0	0	0	0	-0.540941	-0.501034
regulation of primary metabolic process	GO:0080090	BnaA09g48410D	chrA09	AT1G09570	PHYA_FHY2_FRE1_HY8	0	0	0	0	-1.04338	0	0	0
regulation of primary metabolic process	GO:0080090	BnaC06g28080D	chrC06	AT1G69570	Dof_type_zinc_finger_DNA_binding_family_protein	0	0	0	-1.07041	0	0	0	0
regulation of primary metabolic process	GO:0080090	BnaA07g24230D	chrA07	AT1G69570	Dof_type_zinc_finger_DNA_binding_family_protein	0	0	0	0	0	-1.08555	0	0
regulation of primary metabolic process	GO:0080090	BnaC02g43320D	chrC02	AT5G64810	WRKY51_ATWRKY51	0	0	0	0	0	0	0	-1.09325
regulation of primary metabolic process	GO:0080090	BnaA05g24520D	chrA05	AT3G15030	TCP4_MEE35	0	0	-1.12452	0	0	0	0	0
regulation of primary metabolic process	GO:0080090	BnaC03g76640D	chrC03_random	AT4G36540	BEE2	0	0	0	0	-1.15468	0	0	0
regulation of primary metabolic process	GO:0080090	BnaC08g42660D	chrC08	AT1G09570	PHYA_FHY2_FRE1_HY8	0	0	0	0	0	0	-0.626259	-0.588272
regulation of primary metabolic process	GO:0080090	BnaC07g27330D	chrC07	AT5G49620	MYB78	0	0	0	0	0	0	0	-1.23059
regulation of primary metabolic process	GO:0080090	BnaC07g43950D	chrC07	AT4G32800	Integrase_type_DNA_binding_superfamily_protein	0	0	0	0	0	0	0	-1.23256
regulation of primary metabolic process	GO:0080090	BnaC08g42700D	chrC08	AT1G09530	PIF3_POC1_PAP3	0	0	0	-0.6525	0	-0.605107	0	0
regulation of primary metabolic process	GO:0080090	BnaA05g34410D	chrA05_random	AT2G43060	IBH1	0	0	0	0	0	0	0	-1.27338
regulation of primary metabolic process	GO:0080090	BnaA02g34400D	chrA02	AT5G64810	WRKY51_ATWRKY51	0	0	0	0	-1.27861	0	0	0
regulation of primary metabolic process	GO:0080090	BnaC07g46750D	chrC07	AT4G37730	AtbZIP7_bZIP7	0	0	0	0	0	0	0	-1.37382
regulation of primary metabolic process	GO:0080090	BnaC09g07850D	chrC09	AT5G66700	HB53_HB_8_ATHB53	-1.37743	0	0	0	0	0	0	0
regulation of primary metabolic process	GO:0080090	BnaAnng39820D	chrAnn_random	AT4G39410	WRKY13_ATWRKY13	0	0	0	0	0	0	0	-1.37764
regulation of primary metabolic process	GO:0080090	BnaAnng19460D	chrAnn_random	AT1G74430	MYB95_ATMYB95_ATMYBCP66	0	0	0	0	0	0	0	-1.4338
regulation of primary metabolic process	GO:0080090	BnaA03g04840D	chrA03	AT5G14340	AtMYB40_MYB40	0	0	0	0	0	-1.47701	0	0
regulation of primary metabolic process	GO:0080090	BnaA09g52670D	chrA09_random	AT5G66700	HB53_HB_8_ATHB53	-1.48629	0	0	0	0	0	0	0
regulation of primary metabolic process	GO:0080090	BnaC02g22880D	chrC02	AT1G74430	MYB95_ATMYB95_ATMYBCP66	0	0	0	0	0	0	0	-1.50887
regulation of primary metabolic process	GO:0080090	BnaA02g02830D	chrA02	AT5G15830	AtbZIP3_bZIP3	0	0	0	0	0	0	0	-1.54453
regulation of primary metabolic process	GO:0080090	BnaA06g29370D	chrA06	AT5G49620	MYB78	0	0	0	0	0	0	0	-1.58774
regulation of primary metabolic process	GO:0080090	BnaA04g28820D	chrA04_random	AT2G31230	ATERF15_ERF15	0	0	0	0	0	0	0	-1.6072
regulation of primary metabolic process	GO:0080090	BnaA09g07010D	chrA09	AT5G64810	WRKY51_ATWRKY51	0	0	0	-1.68788	0	0	0	0
regulation of primary metabolic process	GO:0080090	BnaC03g22840D	chrC03	AT2G40750	WRKY54_ATWRKY54	0	0	0	0	0	0	0	-1.74777
regulation of primary metabolic process	GO:0080090	BnaA04g02560D	chrA04	AT3G56400	WRKY70_ATWRKY70	0	-0.837483	0	0	-0.928409	0	0	0
regulation of primary metabolic process	GO:0080090	BnaC03g49530D	chrC03	AT5G64750	ABR1	0	0	0	0	0	0	0	-1.79313
regulation of primary metabolic process	GO:0080090	BnaC03g60600D	chrC03	AT4G39410	WRKY13_ATWRKY13	0	0	0	0	0	0	0	-1.80868
regulation of primary metabolic process	GO:0080090	BnaC01g01320D	chrC01	AT4G37730	AtbZIP7_bZIP7	0	0	-1.02848	0	0	0	0	-0.793125
regulation of primary metabolic process	GO:0080090	BnaA07g27840D	chrA07	AT1G69310	WRKY57_ATWRKY57	0	0	0	0	0	0	-0.948705	-0.929834
regulation of primary metabolic process	GO:0080090	BnaC07g38350D	chrC07	AT4G23550	WRKY29_ATWRKY29	0	0	0	0	0	0	0	-1.94077
regulation of primary metabolic process	GO:0080090	BnaA04g12540D	chrA04	AT2G21900	WRKY59_ATWRKY59	0	0	-1.94701	0	0	0	0	0
regulation of primary metabolic process	GO:0080090	BnaA08g10660D	chrA08	AT4G23550	WRKY29_ATWRKY29	0	0	0	0	0	0	0	-1.96704
regulation of primary metabolic process	GO:0080090	BnaCnng44310D	chrCnn_random	AT5G06800	myb_like_HTH_transcriptional_regulator_family_protein	0	0	0	0	-2.04145	0	0	0
regulation of primary metabolic process	GO:0080090	BnaA09g03330D	chrA09	AT5G49450	AtbZIP1_bZIP1	0	-2.18813	0	0	0	0	0	0
regulation of primary metabolic process	GO:0080090	BnaC06g43500D	chrC06_random	AT1G66470	RHD6	0	0	0	0	-2.20953	0	0	0
regulation of primary metabolic process	GO:0080090	BnaA02g05730D	chrA02	AT5G22570	WRKY38_ATWRKY38	0	0	-2.24123	0	0	0	0	0
regulation of primary metabolic process	GO:0080090	BnaA10g19370D	chrA10	AT5G14340	AtMYB40_MYB40	0	0	0	0	-2.32625	0	0	0
regulation of primary metabolic process	GO:0080090	BnaAnng01860D	chrAnn_random	AT5G06800	myb_like_HTH_transcriptional_regulator_family_protein	-1.21162	0	0	0	-1.14365	0	0	0
regulation of primary metabolic process	GO:0080090	BnaA03g29470D	chrA03	AT3G06490	MYB108_AtMYB108_BOS1	0	0	0	0	0	0	0	-2.35723
regulation of primary metabolic process	GO:0080090	BnaAnng16550D	chrAnn_random	AT3G10040	sequence_specific_DNA_binding_transcription_factors	0	0	0	0	0	0	0	-2.35724
regulation of primary metabolic process	GO:0080090	BnaCnng26190D	chrCnn_random	AT1G69310	WRKY57_ATWRKY57	0	0	0	0	0	0	-1.02686	-1.38725
regulation of primary metabolic process	GO:0080090	BnaA06g23710D	chrA06	AT5G64750	ABR1	0	0	0	0	0	0	0	-2.44056
regulation of primary metabolic process	GO:0080090	BnaC03g67380D	chrC03	AT4G31800	WRKY18_ATWRKY18	0	0	0	0	-0.937085	-1.61252	0	0
regulation of primary metabolic process	GO:0080090	BnaA01g05060D	chrA01	AT4G31800	WRKY18_ATWRKY18	0	0	0	-1.31933	0	0	0	-1.27027
regulation of primary metabolic process	GO:0080090	BnaA03g06490D	chrA03	AT5G17300	RVE1	0	-1.47636	0	0	0	0	0	-1.22717
regulation of primary metabolic process	GO:0080090	BnaA03g46020D	chrA03	AT4G23550	WRKY29_ATWRKY29	0	0	0	0	0	0	0	-2.72273
regulation of primary metabolic process	GO:0080090	BnaA07g22240D	chrA07	AT1G74430	MYB95_ATMYB95_ATMYBCP66	0	0	0	-1.13371	0	-0.790288	-0.82651	0
regulation of primary metabolic process	GO:0080090	BnaCnng52600D	chrCnn_random	AT3G56400	WRKY70_ATWRKY70	0	0	-1.45239	0	-1.31971	0	0	0
regulation of primary metabolic process	GO:0080090	BnaA08g24340D	chrA08	AT1G13300	HRS1	0	0	0	0	-1.43385	0	0	-1.4082
regulation of primary metabolic process	GO:0080090	BnaC09g54480D	chrC09_random	AT5G14340	AtMYB40_MYB40	0	0	0	0	-2.90916	0	0	0
regulation of primary metabolic process	GO:0080090	BnaCnng58050D	chrCnn_random	AT3G10040	sequence_specific_DNA_binding_transcription_factors	0	0	0	0	0	0	0	-3.01818
regulation of primary metabolic process	GO:0080090	BnaCnng15140D	chrCnn_random	AT3G47500	CDF3	0	0	-1.09839	0	-1.05615	0	0	-0.907664
regulation of primary metabolic process	GO:0080090	BnaC05g04210D	chrC05	AT1G06160	ORA59	0	0	0	0	0	0	0	-3.08787
regulation of primary metabolic process	GO:0080090	BnaA05g01840D	chrA05	AT2G40750	WRKY54_ATWRKY54	-1.22246	0	0	0	0	0	0	-1.89159
regulation of primary metabolic process	GO:0080090	BnaA01g32800D	chrA01	AT3G06490	MYB108_AtMYB108_BOS1	0	0	0	0	0	0	0	-3.1436
regulation of primary metabolic process	GO:0080090	BnaA05g11530D	chrA05	AT2G31230	ATERF15_ERF15	0	0	-0.909486	-1.1322	0	0	0	-1.20191
regulation of primary metabolic process	GO:0080090	BnaC09g40660D	chrC09	AT5G17300	RVE1	0	-1.47503	0	0	-1.856	0	0	0
regulation of primary metabolic process	GO:0080090	BnaA06g05470D	chrA06	AT1G09570	PHYA_FHY2_FRE1_HY8	-0.585484	-0.652448	-0.752501	-0.610304	0	0	-0.925009	0
regulation of primary metabolic process	GO:0080090	BnaA05g11360D	chrA05	AT2G31380	STH	0	0	0	0	0	0	0	-3.82418
regulation of primary metabolic process	GO:0080090	BnaA09g35840D	chrA09	AT3G56400	WRKY70_ATWRKY70	0	-0.731996	0	-0.766244	-1.23632	-1.11725	0	0
regulation of primary metabolic process	GO:0080090	BnaA07g24310D	chrA07	AT1G69310	WRKY57_ATWRKY57	0	0	-1.12215	-0.775789	0	0	-1.21288	-0.800278
regulation of primary metabolic process	GO:0080090	BnaC04g42060D	chrC04	AT2G31230	ATERF15_ERF15	0	-1.08123	0	0	0	-1.07192	0	-1.76917
regulation of primary metabolic process	GO:0080090	BnaCnng67570D	chrCnn_random	AT3G06490	MYB108_AtMYB108_BOS1	0	0	0	0	0	0	-1.51668	-2.47246
regulation of primary metabolic process	GO:0080090	BnaC06g15910D	chrC06	AT3G56400	WRKY70_ATWRKY70	0	0	-0.933699	-0.975963	-1.2441	-0.863075	0	0
regulation of primary metabolic process	GO:0080090	BnaC05g21490D	chrC05	AT1G27740	RSL4	0	-1.7966	0	0	0	0	0	-2.25624
regulation of primary metabolic process	GO:0080090	BnaA07g37120D	chrA07_random	AT1G25550	myb_like_transcription_factor_family_protein	0	0	-1.07628	0	0	0	-1.16904	-1.82433
regulation of primary metabolic process	GO:0080090	BnaCnng30730D	chrCnn_random	AT2G31380	STH	0	0	0	0	0	0	0	-4.08479
regulation of primary metabolic process	GO:0080090	BnaAnng01320D	chrAnn_random	AT5G05410	DREB2A_DREB2	-0.924537	0	0	0	-0.902925	-1.08483	0	-1.17743
regulation of primary metabolic process	GO:0080090	BnaC04g13510D	chrC04	AT2G31230	ATERF15_ERF15	-0.730698	0	-0.733779	-0.802308	-0.803371	0	0	-1.04649
regulation of primary metabolic process	GO:0080090	BnaA10g24150D	chrA10	AT5G06800	myb_like_HTH_transcriptional_regulator_family_protein	-1.1401	-0.997072	-0.893095	0	-1.12692	0	0	0
regulation of primary metabolic process	GO:0080090	BnaAnng22720D	chrAnn_random	AT3G47500	CDF3	-0.91063	0	-1.01262	0	-1.19506	0	0	-1.09018
regulation of primary metabolic process	GO:0080090	BnaA02g34710D	chrA02	AT5G66700	HB53_HB_8_ATHB53	-2.15051	0	-2.09304	0	0	0	0	0
regulation of primary metabolic process	GO:0080090	BnaA07g25860D	chrA07	AT1G66470	RHD6	-1.31551	0	0	0	-1.31471	0	-1.64548	0
regulation of primary metabolic process	GO:0080090	BnaC02g43290D	chrC02	AT5G64750	ABR1	0	0	0	0	0	0	0	-4.39287
regulation of primary metabolic process	GO:0080090	BnaA01g00310D	chrA01	AT4G37730	AtbZIP7_bZIP7	-1.03803	0	-1.14281	-1.24099	0	0	0	-0.996596
regulation of primary metabolic process	GO:0080090	BnaA02g35240D	chrA02_random	AT5G57620	MYB36_AtMYB36	-0.610921	-0.598176	0	-0.698379	-0.630415	-0.999289	0	-0.906632
regulation of primary metabolic process	GO:0080090	BnaA09g28450D	chrA09	AT1G25340	MYB116_AtMYB116	0	-2.05732	0	0	0	-2.44396	0	0
regulation of primary metabolic process	GO:0080090	BnaA10g01150D	chrA10	AT1G02450	NIMIN1_NIMIN_1	0	-0.992861	0	-1.07908	0	-0.818235	0	-1.62089
regulation of primary metabolic process	GO:0080090	BnaA02g34370D	chrA02	AT5G64750	ABR1	0	0	0	0	0	0	0	-4.52008
regulation of primary metabolic process	GO:0080090	BnaA02g30960D	chrA02	AT5G49620	MYB78	0	-1.3065	-1.18489	0	0	0	0	-2.07603
regulation of primary metabolic process	GO:0080090	BnaC01g06660D	chrC01	AT4G31800	WRKY18_ATWRKY18	0	-1.16727	0	-1.12633	-1.07647	-1.20095	0	0
regulation of primary metabolic process	GO:0080090	BnaA06g34070D	chrA06	AT2G02710	PLP_PLPB	-0.988883	-0.827521	-0.736843	-1.14551	0	0	0	-0.903477
regulation of primary metabolic process	GO:0080090	BnaC05g01240D	chrC05	AT1G02450	NIMIN1_NIMIN_1	0	-0.9534	0	-1.16615	0	-0.848966	0	-1.63415
regulation of primary metabolic process	GO:0080090	BnaA10g04090D	chrA10	AT1G06160	ORA59	0	0	0	-1.67963	0	0	0	-2.93182
regulation of primary metabolic process	GO:0080090	BnaC02g39310D	chrC02	AT5G28770	BZO2H3	-0.851309	-0.809964	-0.951	-1.03984	0	0	0	-0.976053
regulation of primary metabolic process	GO:0080090	BnaA07g16850D	chrA07	AT3G56400	WRKY70_ATWRKY70	0	-0.895273	-1.21056	-1.32401	-1.22283	0	0	0
regulation of primary metabolic process	GO:0080090	BnaC03g38150D	chrC03	AT3G13810	IDD11	0	-0.94136	-0.783652	-1.08372	0	-1.01659	0	-0.83403
regulation of primary metabolic process	GO:0080090	BnaA09g50010D	chrA09	AT1G06160	ORA59	0	0	0	-1.92727	0	0	0	-2.80883
regulation of primary metabolic process	GO:0080090	BnaC03g17400D	chrC03	AT2G31230	ATERF15_ERF15	0	-1.22269	0	0	0	-1.33012	0	-2.22462
regulation of primary metabolic process	GO:0080090	BnaA05g27930D	chrA05	AT3G11020	DREB2B_DREB2	0	-1.47316	-1.50587	0	0	0	0	-1.81486
regulation of primary metabolic process	GO:0080090	BnaA06g23750D	chrA06	AT5G64810	WRKY51_ATWRKY51	-0.961137	-0.740031	-1.27527	-1.23406	-0.589545	0	0	0
regulation of primary metabolic process	GO:0080090	BnaA04g29310D	chrA04_random	AT2G40350	NA	0	0	0	0	-2.69978	0	-2.20028	0
regulation of primary metabolic process	GO:0080090	BnaC04g47350D	chrC04	AT2G40750	WRKY54_ATWRKY54	-0.948307	-1.056	0	-1.14476	-0.908145	-0.858562	0	0
regulation of primary metabolic process	GO:0080090	BnaA08g16080D	chrA08	AT4G40060	ATHB16_ATHB_16_HB16	-0.794407	-0.654295	-0.701499	-0.58418	-0.805858	0	-0.6341	-0.771464
regulation of primary metabolic process	GO:0080090	BnaA03g31790D	chrA03	AT3G11580	AP2_B3_like_transcriptional_factor_family_protein	0	0	0	0	-3.2536	0	0	-1.70995
regulation of primary metabolic process	GO:0080090	BnaC02g18310D	chrC02	AT1G68520	B_box_type_zinc_finger_protein_with_CCT_domain	0	0	-1.78669	0	0	0	0	-3.1862
regulation of primary metabolic process	GO:0080090	BnaC04g52930D	chrC04_random	AT2G43060	IBH1	0	0	0	0	-1.47748	0	-1.38767	-2.16083
regulation of primary metabolic process	GO:0080090	BnaC03g06410D	chrC03	AT5G14340	AtMYB40_MYB40	-1.47291	0	0	0	-3.57191	0	0	0
regulation of primary metabolic process	GO:0080090	BnaC03g49470D	chrC03	AT5G64810	WRKY51_ATWRKY51	-1.1001	-0.773588	-1.24669	-1.13708	-0.803659	0	0	0
regulation of primary metabolic process	GO:0080090	BnaC08g19170D	chrC08	AT1G19700	BEL10_BLH10	-1.08425	-0.808328	-0.585041	-1.00729	0	-0.556037	-0.524942	-0.515169
regulation of primary metabolic process	GO:0080090	BnaC06g25390D	chrC06	AT1G69310	WRKY57_ATWRKY57	0	0	-0.85151	-0.865394	0	-0.622254	-1.46433	-1.3188
regulation of primary metabolic process	GO:0080090	BnaC07g21830D	chrC07	AT2G02710	PLP_PLPB	-0.88195	-0.797157	-0.733094	-1.04916	0	-0.658126	0	-1.04828
regulation of primary metabolic process	GO:0080090	BnaA02g31000D	chrA02	AT5G28770	BZO2H3	-1.11477	-0.852922	-0.94177	-1.01966	0	0	0	-1.28222
regulation of primary metabolic process	GO:0080090	BnaCnng59480D	chrCnn_random	AT5G57620	MYB36_AtMYB36	-0.788229	0	0	0	-1.22518	-1.46585	-1.06718	-0.682061
regulation of primary metabolic process	GO:0080090	BnaA02g16580D	chrA02	AT1G73830	BEE3	0	0	0	0	0	0	0	-5.24754
regulation of primary metabolic process	GO:0080090	BnaC05g22860D	chrC05	AT3G06490	MYB108_AtMYB108_BOS1	0	0	0	0	0	0	-2.13797	-3.16631
regulation of primary metabolic process	GO:0080090	BnaA06g27720D	chrA06	AT5G25475	AP2_B3_like_transcriptional_factor_family_protein	0	-1.89879	0	-1.26675	0	0	0	-2.18715
regulation of primary metabolic process	GO:0080090	BnaCnng19880D	chrCnn_random	AT1G09570	PHYA_FHY2_FRE1_HY8	-0.681295	-0.734402	-0.818919	-0.625576	-0.729768	0	-1.05394	-0.726948
regulation of primary metabolic process	GO:0080090	BnaC08g27340D	chrC08	AT3G56400	WRKY70_ATWRKY70	0	0	-0.934711	-0.982862	-1.4499	-1.10072	-0.907544	0
regulation of primary metabolic process	GO:0080090	BnaA09g55920D	chrA09_random	AT2G21900	WRKY59_ATWRKY59	0	0	-1.44366	-1.30846	-1.01609	0	0	-1.64623
regulation of primary metabolic process	GO:0080090	BnaA08g15250D	chrA08	AT4G36540	BEE2	0	-1.5027	0	-1.36756	-1.40034	-1.26582	0	0
regulation of primary metabolic process	GO:0080090	BnaA10g02150D	chrA10	AT1G03790	SOM	0	-5.56025	0	0	0	0	0	0
regulation of primary metabolic process	GO:0080090	BnaC01g36430D	chrC01	AT3G15030	TCP4_MEE35	-1.41223	-1.51705	-1.18401	0	0	0	-1.50207	0
regulation of primary metabolic process	GO:0080090	BnaC05g07080D	chrC05	AT1G09530	PIF3_POC1_PAP3	-0.969149	0	0	-1.29777	-0.974659	-1.3062	-1.07083	0
regulation of primary metabolic process	GO:0080090	BnaC06g34680D	chrC06	AT1G73830	BEE3	0	0	0	0	-1.7217	0	-1.5721	-2.35755
regulation of primary metabolic process	GO:0080090	BnaA06g37850D	chrA06_random	AT1G09530	PIF3_POC1_PAP3	0	0	-1.73343	-1.53583	0	0	-1.1544	-1.24873
regulation of primary metabolic process	GO:0080090	BnaA08g18780D	chrA08	AT1G27740	RSL4	0	0	0	0	0	0	-2.88493	-2.86924
regulation of primary metabolic process	GO:0080090	BnaC02g09670D	chrC02	AT5G22570	WRKY38_ATWRKY38	0	-1.24432	-1.9354	-1.49088	-1.08363	0	0	0
regulation of primary metabolic process	GO:0080090	BnaC08g35490D	chrC08	AT2G21900	WRKY59_ATWRKY59	-1.388	0	0	-1.55177	-1.20125	0	0	-1.70854
regulation of primary metabolic process	GO:0080090	BnaA04g23480D	chrA04	AT2G40750	WRKY54_ATWRKY54	-0.766333	-1.11609	-0.766662	-1.27513	-1.18721	0	0	-0.74148
regulation of primary metabolic process	GO:0080090	BnaC09g49920D	chrC09	AT5G05410	DREB2A_DREB2	0	0	0	0	-1.59835	0	-1.7809	-2.474
regulation of primary metabolic process	GO:0080090	BnaC06g43390D	chrC06_random	AT1G69570	Dof_type_zinc_finger_DNA_binding_family_protein	-1.15506	-1.06381	0	-1.3104	-1.15373	0	0	-1.17044
regulation of primary metabolic process	GO:0080090	BnaA01g29050D	chrA01	AT3G15030	TCP4_MEE35	0	0	-1.54256	-1.04747	0	0	-2.18097	-1.21288
regulation of primary metabolic process	GO:0080090	BnaA07g20890D	chrA07	AT1G66470	RHD6	-1.55847	0	0	0	-1.76642	0	-1.4777	-1.20267
regulation of primary metabolic process	GO:0080090	BnaC06g13020D	chrC06	AT1G66470	RHD6	-1.55847	0	0	0	-1.76642	0	-1.4777	-1.20266
regulation of primary metabolic process	GO:0080090	BnaA02g34570D	chrA02	AT5G65130	Integrase_type_DNA_binding_superfamily_protein	-3.62127	0	-2.39022	0	0	0	0	0
regulation of primary metabolic process	GO:0080090	BnaA07g38970D	chrA07_random	AT1G73830	BEE3	0	0	0	0	-1.76232	0	-2.12839	-2.20024
regulation of primary metabolic process	GO:0080090	BnaA02g33230D	chrA02	AT5G62165	AGL42	-0.92471	-0.897269	0	-0.918312	-1.06616	-1.09993	0	-1.20902
regulation of primary metabolic process	GO:0080090	BnaA08g15490D	chrA08	AT4G37180	Homeodomain_like_superfamily_protein	0	0	0	0	-1.68226	-1.29508	-1.63234	-1.52123
regulation of primary metabolic process	GO:0080090	BnaAnng40920D	chrAnn_random	AT2G31230	ATERF15_ERF15	0	-1.23397	0	-1.44266	0	-1.46087	0	-2.0102
regulation of primary metabolic process	GO:0080090	BnaA06g07440D	chrA06	AT1G13300	HRS1	0	-1.23978	-1.91605	-1.5634	0	0	0	-1.50709
regulation of primary metabolic process	GO:0080090	BnaC03g66900D	chrC03	AT4G32800	Integrase_type_DNA_binding_superfamily_protein	0	0	0	0	0	0	-3.27507	-2.99321
regulation of primary metabolic process	GO:0080090	BnaC07g22940D	chrC07	AT3G25790	myb_like_transcription_factor_family_protein	-1.62106	-1.44223	-1.66828	-1.70388	0	0	0	0
regulation of primary metabolic process	GO:0080090	BnaA03g33060D	chrA03	AT3G13810	IDD11	0	-1.09485	-1.21011	-1.44493	0	-1.16961	0	-1.51788
regulation of primary metabolic process	GO:0080090	BnaA04g13200D	chrA04	AT2G22750	basic_helix_loop_helix_	0	-1.51757	0	-1.63877	0	-1.4792	0	-1.97667
regulation of primary metabolic process	GO:0080090	BnaCnng59700D	chrCnn_random	AT3G15030	TCP4_MEE35	-1.0617	-1.00698	-1.31594	0	-0.971044	0	-1.30391	-0.96563
regulation of primary metabolic process	GO:0080090	BnaC03g01590D	chrC03	AT5G04150	BHLH101	0	0	0	0	0	-2.05403	-2.13207	-2.50586
regulation of primary metabolic process	GO:0080090	BnaA01g32300D	chrA01	AT3G08730	ATPK1_ATPK6_ATS6K1_PK6_PK1_S6K1	-0.881608	-0.774798	-0.778784	-0.999641	-0.913928	0	-1.25369	-1.1082
regulation of primary metabolic process	GO:0080090	BnaA05g25580D	chrA05	AT3G13810	IDD11	-1.12297	-0.892724	-1.10404	-1.1453	-0.562565	-0.602806	-0.680397	-0.752366
regulation of primary metabolic process	GO:0080090	BnaC05g45330D	chrC05	AT3G06490	MYB108_AtMYB108_BOS1	0	0	-1.56112	0	0	0	-2.11976	-3.26936
regulation of primary metabolic process	GO:0080090	BnaCnng28590D	chrCnn_random	AT3G13810	IDD11	-1.16025	-1.081	-0.951306	-1.40333	0	-0.833448	-0.743375	-0.798857
regulation of primary metabolic process	GO:0080090	BnaA10g25000D	chrA10	AT5G05410	DREB2A_DREB2	0	0	0	0	-1.71489	-1.2	-1.82377	-2.26398
regulation of primary metabolic process	GO:0080090	BnaC04g55700D	chrC04_random	AT4G13620	Integrase_type_DNA_binding_superfamily_protein	-1.52238	-2.64087	-1.53683	-1.31844	0	0	0	0
regulation of primary metabolic process	GO:0080090	BnaA10g17370D	chrA10	AT5G17300	RVE1	-1.74045	-2.23864	0	0	-1.55428	0	0	-1.48831
regulation of primary metabolic process	GO:0080090	BnaC05g36990D	chrC05	AT3G16350	Homeodomain_like_superfamily_protein	0	-1.43327	-1.66393	-1.83923	0	0	0	-2.10289
regulation of primary metabolic process	GO:0080090	BnaA04g26770D	chrA04	AT2G46810	basic_helix_loop_helix_	0	-3.37089	0	0	0	-3.70762	0	0
regulation of primary metabolic process	GO:0080090	BnaC01g39350D	chrC01	AT3G08730	ATPK1_ATPK6_ATS6K1_PK6_PK1_S6K1	-1.00307	0	-0.98089	-0.889915	-0.907025	0	-2.0095	-1.35435
regulation of primary metabolic process	GO:0080090	BnaC07g27220D	chrC07	AT5G49450	AtbZIP1_bZIP1	-1.89804	-1.61304	-1.3678	-1.25152	0	0	0	-1.02054
regulation of primary metabolic process	GO:0080090	BnaA07g31550D	chrA07	AT1G74430	MYB95_ATMYB95_ATMYBCP66	0	0	-1.45357	-2.01421	0	-2.44841	-1.40753	0
regulation of primary metabolic process	GO:0080090	BnaA03g19190D	chrA03	AT2G40750	WRKY54_ATWRKY54	0	-1.09773	-1.40595	-1.21338	0	0	-1.17996	-2.49834
regulation of primary metabolic process	GO:0080090	BnaA10g30200D	chrA10_random	AT5G07580	Integrase_type_DNA_binding_superfamily_protein	0	-1.27857	-1.29635	-1.38695	0	0	-1.31893	-2.13008
regulation of primary metabolic process	GO:0080090	BnaC03g08310D	chrC03	AT5G17300	RVE1	-1.22754	0	-1.01018	-1.38889	-1.46834	0	-1.0758	-1.27345
regulation of primary metabolic process	GO:0080090	BnaC01g01940D	chrC01	AT4G37180	Homeodomain_like_superfamily_protein	0	0	-1.10688	-1.19401	-1.62355	0	-1.66156	-1.86635
regulation of primary metabolic process	GO:0080090	BnaC03g61720D	chrC03	AT4G37180	Homeodomain_like_superfamily_protein	0	0	0	-1.15475	-1.63233	-1.27799	-1.83451	-1.64379
regulation of primary metabolic process	GO:0080090	BnaA05g30870D	chrA05	AT3G06490	MYB108_AtMYB108_BOS1	0	0	-1.97487	0	0	0	-2.20507	-3.47098
regulation of primary metabolic process	GO:0080090	BnaC05g00870D	chrC05	AT1G01030	NGA3	-1.62642	-1.39693	-1.32964	-1.22145	0	0	-1.05002	-1.35863
regulation of primary metabolic process	GO:0080090	BnaC07g45960D	chrC07	AT4G36060	bHLH11	0	-2.63112	0	0	0	-2.90682	0	-2.72071
regulation of primary metabolic process	GO:0080090	BnaC04g01540D	chrC04	AT2G40750	WRKY54_ATWRKY54	-1.45283	-1.55391	-1.19456	-1.23545	0	0	-1.18532	-1.97273
regulation of primary metabolic process	GO:0080090	BnaCnng36390D	chrCnn_random	AT5G07580	Integrase_type_DNA_binding_superfamily_protein	0	-1.71675	-1.84255	0	0	0	-1.89153	-3.22145
regulation of primary metabolic process	GO:0080090	BnaA09g27770D	chrA09	AT1G27740	RSL4	-2.3948	0	0	0	-3.64294	0	0	-2.67881
regulation of primary metabolic process	GO:0080090	BnaA06g40630D	chrA06_random	AT4G39410	WRKY13_ATWRKY13	-1.13421	-1.0605	-0.946113	-1.87266	0	-1.13616	-1.29528	-1.49627
regulation of primary metabolic process	GO:0080090	BnaA08g21960D	chrA08	AT1G19700	BEL10_BLH10	-1.90236	-1.48178	-1.34134	-1.77978	0	0	-1.28791	-1.20123
regulation of primary metabolic process	GO:0080090	BnaC02g07210D	chrC02	AT5G17300	RVE1	-2.1078	-2.78026	0	-2.11407	-2.06053	0	0	0
regulation of primary metabolic process	GO:0080090	BnaA06g29500D	chrA06	AT5G49450	AtbZIP1_bZIP1	-2.0498	-1.52839	-1.87187	-1.9573	0	0	0	-1.74679
regulation of primary metabolic process	GO:0080090	BnaA03g55280D	chrA03_random	AT5G05410	DREB2A_DREB2	-1.56888	-0.889574	0	-1.03442	-1.33134	-1.51741	-0.99667	-1.90312
regulation of primary metabolic process	GO:0080090	BnaAnng35540D	chrAnn_random	AT3G16350	Homeodomain_like_superfamily_protein	0	-1.43686	-1.67281	-1.43496	0	0	-1.81058	-2.88788
regulation of primary metabolic process	GO:0080090	BnaA09g19580D	chrA09	AT3G25790	myb_like_transcription_factor_family_protein	0	-1.27881	-1.41477	-1.85624	-1.25587	0	-1.33225	-2.13285
regulation of primary metabolic process	GO:0080090	BnaA03g30410D	chrA03	AT3G10040	sequence_specific_DNA_binding_transcription_factors	0	0	-2.46965	-2.698	0	0	0	-4.32207
regulation of primary metabolic process	GO:0080090	BnaC09g21560D	chrC09	AT3G25790	myb_like_transcription_factor_family_protein	0	-1.2851	-1.6131	-1.75364	-1.51224	0	-1.40946	-2.06405
regulation of primary metabolic process	GO:0080090	BnaCnng13810D	chrCnn_random	AT2G21900	WRKY59_ATWRKY59	-2.05432	-1.78189	-2.1735	-1.95854	0	0	0	-1.86775
regulation of primary metabolic process	GO:0080090	BnaA01g13230D	chrA01	AT4G23550	WRKY29_ATWRKY29	0	0	-2.09145	0	-2.40364	0	-2.95469	-2.54557
regulation of primary metabolic process	GO:0080090	BnaA02g03510D	chrA02	AT5G17300	RVE1	-2.08989	-2.11034	0	-1.90834	-2.38524	0	-1.61756	0
regulation of primary metabolic process	GO:0080090	BnaA06g29270D	chrA06	AT5G28770	BZO2H3	-1.59526	-1.53028	-1.77455	-1.6471	0	0	-1.60099	-2.17908
regulation of primary metabolic process	GO:0080090	BnaC09g06610D	chrC09	AT5G64750	ABR1	0	0	0	0	0	0	-4.48283	-6.06485
regulation of primary metabolic process	GO:0080090	BnaA01g00920D	chrA01	AT4G37180	Homeodomain_like_superfamily_protein	0	-1.19851	-1.33931	-1.50497	-2.04381	0	-2.11972	-2.49976
regulation of primary metabolic process	GO:0080090	BnaC07g27440D	chrC07	AT5G28770	BZO2H3	-1.62275	-1.36797	-1.57616	-1.61569	-1.10888	0	-1.47197	-2.11565
regulation of primary metabolic process	GO:0080090	BnaA10g00810D	chrA10	AT1G01030	NGA3	-1.73741	-1.54509	-1.56556	-1.61119	-0.87115	0	-2.1021	-1.57603
regulation of primary metabolic process	GO:0080090	BnaA08g21860D	chrA08	AT1G20340	DRT112_PETE2	-1.17471	-2.1847	-1.86823	-2.26002	-1.84626	-1.67508	0	0
regulation of primary metabolic process	GO:0080090	BnaA10g27750D	chrA10_random	AT1G04370	ATERF14_ERF14	0	0	0	-2.90363	0	-2.27993	0	-5.82626
regulation of primary metabolic process	GO:0080090	BnaC03g38850D	chrC03	AT3G15030	TCP4_MEE35	-1.99044	-1.78055	-1.59842	-1.32472	-1.47909	0	-1.82861	-1.03439
regulation of primary metabolic process	GO:0080090	BnaC05g42130D	chrC05	AT3G11020	DREB2B_DREB2	-1.33604	-1.53501	-1.71856	-1.26679	0	-1.15623	-1.53198	-2.54434
regulation of primary metabolic process	GO:0080090	BnaC06g30320D	chrC06	AT1G68670	myb_like_transcription_factor_family_protein	-0.877551	-1.31504	-1.12552	-1.58398	-1.32049	-1.02621	-1.8749	-2.05204
regulation of primary metabolic process	GO:0080090	BnaC03g07400D	chrC03	AT5G15830	AtbZIP3_bZIP3	-3.0737	0	0	-2.91429	-3.19523	0	0	-2.02973
regulation of primary metabolic process	GO:0080090	BnaA03g33680D	chrA03	AT3G15030	TCP4_MEE35	-1.75765	-1.48836	-1.70424	-1.41431	-1.79448	0	-1.9575	-1.17543
regulation of primary metabolic process	GO:0080090	BnaC02g18390D	chrC02	AT1G68670	myb_like_transcription_factor_family_protein	-1.28862	-1.32475	-1.84498	-1.69808	-1.23352	0	-1.73151	-2.46088
regulation of primary metabolic process	GO:0080090	BnaA03g55680D	chrA03_random	AT5G06800	myb_like_HTH_transcriptional_regulator_family_protein	-2.09125	-2.1909	-1.2216	0	-3.74941	0	-1.34499	-1.09212
regulation of primary metabolic process	GO:0080090	BnaA07g27330D	chrA07	AT1G68670	myb_like_transcription_factor_family_protein	0	-1.31983	-1.27235	-1.95748	-2.3907	-1.28047	-2.33785	-3.13612
regulation of primary metabolic process	GO:0080090	BnaCnng08670D	chrCnn_random	AT1G01380	ETC1	-1.79002	0	-1.70382	-1.45385	-3.24837	-2.20694	-2.29783	-1.76115
regulation of primary metabolic process	GO:0080090	BnaA06g33390D	chrA06	AT3G25790	myb_like_transcription_factor_family_protein	-2.09339	-2.03834	-2.20764	-1.7807	-2.71278	0	-2.26795	-1.9202
regulation of primary metabolic process	GO:0080090	BnaA03g26820D	chrA03	AT4G01060	ETC3_CPL3	-4.3201	-5.12567	-2.72769	-2.66807	0	0	-1.83583	0
regulation of primary metabolic process	GO:0080090	BnaC02g20610D	chrC02	AT1G71200	basic_helix_loop_helix_	-1.705	-2.77547	-2.09753	-3.09083	-1.22641	-2.56195	-1.86931	-3.13306
regulation of primary metabolic process	GO:0080090	BnaCnng26710D	chrCnn_random	AT1G20340	DRT112_PETE2	-2.15527	-2.28254	-2.81451	-2.67627	-2.7051	-1.93441	-1.62416	-2.34361
regulation of primary metabolic process	GO:0080090	BnaA07g29170D	chrA07	AT1G71200	basic_helix_loop_helix_	-2.16125	-2.34923	-2.38041	-2.11195	-2.59971	-2.02106	-3.27239	-2.9656
regulation of primary metabolic process	GO:0080090	BnaC06g32310D	chrC06	AT1G71200	basic_helix_loop_helix_	-2.25099	-2.30837	-1.82135	-2.3891	-3.80787	-1.92299	-3.31114	-2.87555
regulation of primary metabolic process	GO:0080090	BnaA03g34140D	chrA03	AT3G16350	Homeodomain_like_superfamily_protein	-3.54891	-3.299	-3.83831	-3.54341	-2.57971	0	-4.01869	-4.65215
regulation of primary metabolic process	GO:0080090	BnaC03g39590D	chrC03	AT3G16350	Homeodomain_like_superfamily_protein	-3.83259	-3.57264	-3.53061	-3.21439	-3.10395	0	-5.49275	-6.756
regulation of primary metabolic process	GO:0080090	BnaA02g15360D	chrA02	AT1G71200	basic_helix_loop_helix_	-4.56844	-4.41177	-3.93034	-4.11628	-4.95219	-3.33029	-6.09263	-6.67575
